# Supplementary material for: Stereoselective synthesis of chiral sultam-fused dihydropyridinones via photopromoted NHC catalyzed [4 + 2] annulation
Source: Royal Society of Chemistry journal article supplement (doi:10.1039/d2qo00908k), 2022-01-01
Supplement: d2qo00908k1.pdf [file d2qo00908k1.pdf]

## Supporting Information

# Stereoselective Synthesis of Chiral Sultam-Fused Dihydropyridinones *via* Photopromoted NHC Catalyzed [4+2] Annulation

Yangxu Chen, Bai Shi, Huiping Yin, Yiping Liu, Chenxia Yu, Kai Zhang,\* Tuanjie Li,\* and  
Changsheng Yao\*

*Jiangsu Key Lab of Green Synthetic Chemistry for Functional Materials, School of Chemistry &  
Materials Science, Jiangsu Normal University, Xuzhou Jiangsu 221116, P. R. China*  
*csyao@jsnu.edu.cn*

### Table of Contents

|                                                                    |    |
|--------------------------------------------------------------------|----|
| 1. General Methods and Materials .....                             | 2  |
| 2. References .....                                                | 2  |
| 3. General Procedures for the Synthesis of Products .....          | 3  |
| 3.1 General procedure for the synthesis of products <b>3</b> ..... | 3  |
| 3.2 Procedure of the sunlight reaction. ....                       | 4  |
| 4. Characterization Data of Products .....                         | 4  |
| 5. NMR Spectra .....                                               | 11 |
| 6. HPLC Spectra of Compounds <b>3a–3q</b> .....                    | 29 |

## 1. General Methods and Materials

Unless otherwise mentioned, all reactions were carried out under an atmosphere of argon in dry glassware and were monitored by analytical thin-layer chromatography (TLC), which was visualized by ultraviolet light (254 nm). All solvents were obtained from commercial sources and were purified according to standard procedures. All syntheses and manipulations were carried out under a dry argon atmosphere. Purification of the products was accomplished by flash chromatography using silica gel (200-300 mesh). Melting points were determined in open capillaries and were uncorrected.  $^1\text{H}$  NMR spectra were measured on a 400 MHz spectrometer in  $\text{CDCl}_3$  (100 MHz,  $^{13}\text{C}$  NMR) or  $\text{DMSO}-d_6$  with chemical shift ( $\delta$ ) given in ppm relative to TMS as internal standard. Data were reported as follows: chemical shift, multiplicity (s = singlet, d = doublet, t = triplet, q = quartet, m = multiple), coupling constants (Hz), integration. High-resolution mass spectra (HRMS) were measured with ESI in a positive mode. The ee value determination was carried out using chiral HPLC with Chiralpak AD-H, IA and OD-H column on Agilent 1100 with a UV-detector.

Saccharine-derived 1-azadienes<sup>1</sup> **1** and  $\alpha$ -diazoketones<sup>2, 3</sup> **2** were prepared according to literatures, respectively.

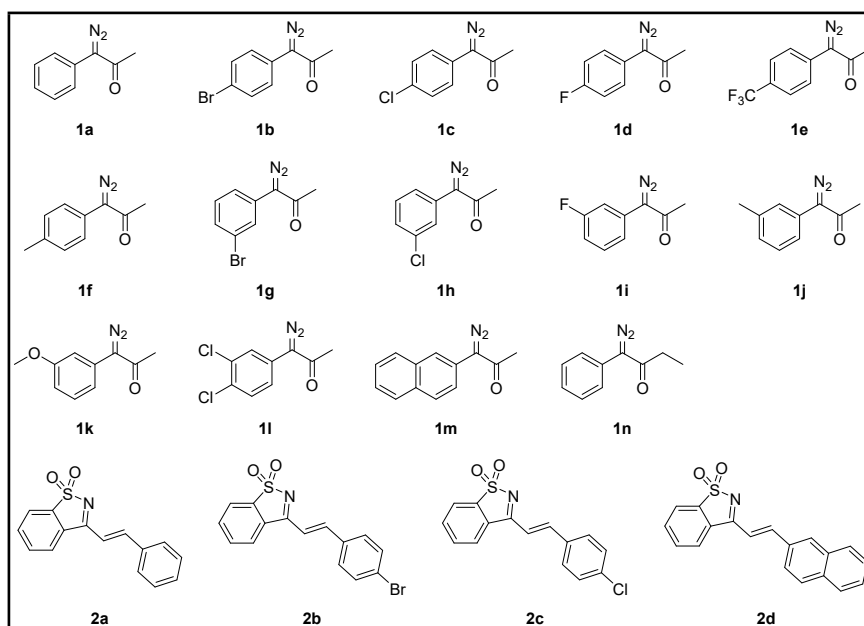

## 2. References

1. X. Feng, Z. Zhou, C. Ma, X. Yin, R. Li, L. Dong and Y.-C. Chen, Trienamines Derived from Interrupted Cyclic 2,5-Dienones: Remote  $\delta,\epsilon$ -C-C Bond Activation for Asymmetric Inverse-Electron-Demand Aza-Diels–Alder Reaction, *Angew. Chem. Int. Ed.*, 2013, **52**, 14173-14176.
2. B. Xu, S.-F. Zhu, X.-D. Zuo, Z.-C. Zhang and Q.-L. Zhou, Enantioselective N-H Insertion Reaction of  $\alpha$ -Aryl  $\alpha$ -Diazoketones: An Efficient Route to Chiral  $\alpha$ -Aminoketones, *Angew. Chem. Int. Ed.*, 2014, **53**, 3913-3916.
3. Q. Lu, S. Mondal, S. Cembellín and F. Glorius, MnI/AgI Relay Catalysis: Traceless Diazo-Assisted C(sp<sup>2</sup>)–H/C(sp<sup>3</sup>)–H Coupling to  $\beta$ -(Hetero)Aryl/Alkenyl Ketones, *Angew. Chem. Int. Ed.*, 2018, **57**, 10732-10736.

## 3. General Procedures for the Synthesis of Products

### 3.1 General procedure for the synthesis of products 3

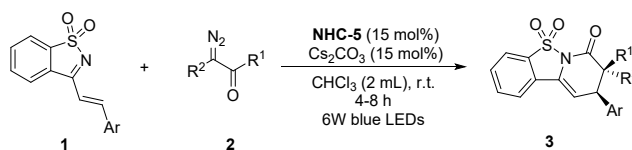

A dried and argon-filled Schlenk tube was charged with saccharine-derived 1-azadienes **1** (0.10 mmol),  $\alpha$ -diazoketones **2** (0.20 mmol, 2.0 equiv.), **NHC-5** (0.015 mmol, 6.8 mg), and Cs<sub>2</sub>CO<sub>3</sub> (0.015 mmol, 4.9 mg) in dry CHCl<sub>3</sub> (2 mL). The reaction mixture was stirred under the irradiation of 6W blue LEDs at room temperature until the consumption of saccharine-derived 1-azadienes **1** as monitored by TLC. The solvent was removed in vacuo and the residue was purified by chromatography on silica gel using PE/EA (10:1) as eluent to afford the desired products **3**.

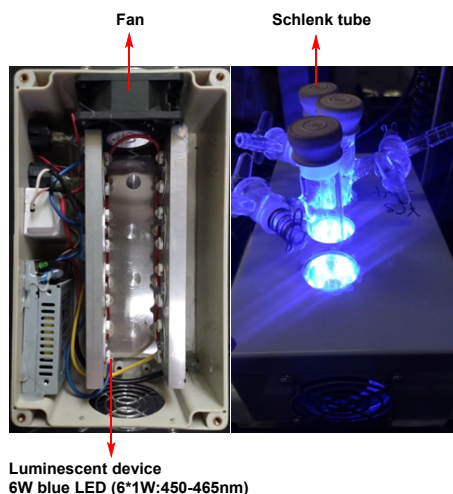

### 3.2 Procedure of the sunlight reaction

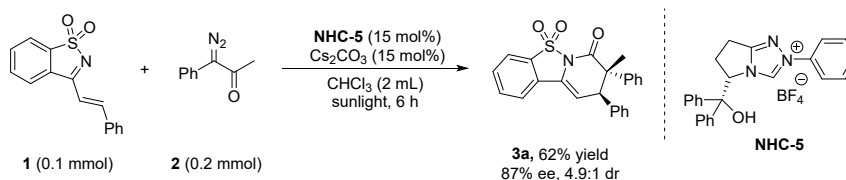

An oven-dried 10 mL Schlenk tube equipped with a magnetic stir bar was charged with 1-azadienes **1** (0.1 mmol, 1.0 eq.),  $\alpha$ -diazoketones **2** (0.2 mmol, 2.0 eq.), **NHC-5** (0.015 mmol, 6.8 mg), and  $\text{Cs}_2\text{CO}_3$  (0.015 mmol, 4.9 mg) in dry  $\text{CHCl}_3$  (2 mL) under Ar and irradiation of sunlight, after 6 h of stirring at room temperature until the reaction was completed, as monitored by TLC analysis. The product **3** was purified by flash column chromatography on silica gel (PE/EA=10/1).

### 4. Characterization Data of Products

**(8*S*,9*R*)-8-methyl-8,9-diphenyl-8,9-dihydro-7*H*-benzo[4,5]isothiazolo[2,3-*a*]pyridin-7-one 5,5-dioxide (3a).**

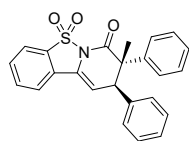

White solid (28.1 mg, 70% yield); mp 194.7 – 196.5 °C;  $^1\text{H}$  NMR (400 MHz,  $\text{CDCl}_3$ )  $\delta$  7.96 – 7.78 (m, 1H, major + minor), 7.77 – 7.64 (m, 1H, major + minor), 7.63 – 7.54 (m, 2H, major + minor), 7.49 – 7.42 (m, 2H, major + minor), 7.36 – 7.27 (m, 4H, major + minor), 7.24 – 7.17 (m, 2H, major + minor), 7.16 – 7.03 (m, 1H, major + minor), 6.83 – 6.71 (m, 1H, major + minor), 6.15 (d,  $J$  = 6.1 Hz, 0.82H, major), 6.06 (d,  $J$  = 3.9 Hz, 0.2H, minor), 4.30 (d,  $J$  = 6.1 Hz, 0.83H, major), 4.01 (d,  $J$  = 3.8 Hz, 0.18H, minor), 1.84 (s, 0.52H, minor), 1.30 (s, 2.42H, major).  $^{13}\text{C}$  NMR (100 MHz,  $\text{CDCl}_3$ )  $\delta$  (major) 169.9, 141.9, 137.5, 133.9, 132.7, 130.8, 129.1, 128.8, 128.7, 128.0, 127.9, 127.6, 126.5, 125.8, 121.7, 121.5, 106.6, 52.7, 50.4, 23.3. HRMS (ESI)  $m/z$  calcd for  $[\text{M} + \text{Na}]^+$   $\text{C}_{24}\text{H}_{19}\text{NNaO}_3\text{S}$ : 424.0978; found: 424.0972; HPLC (Daicel Chiralpak IA column, *n*-hexane/*i*-PrOH = 70/30, flow rate = 1.0

mL/min, 254 nm, 25 °C, retention time:  $t_{\text{major}} = 14.923$  min,  $t_{\text{minor}} = 36.160$  min, 95% ee; 9.8:1 dr).

**(8*S*,9*R*)-8-(4-bromophenyl)-8-methyl-9-phenyl-8,9-dihydro-7*H*-benzo[4,5]isothiazolo[2,3-*a*]pyridin-7-one 5,5-dioxide (3b).**

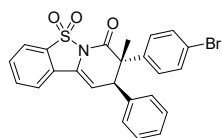

White solid (35.9 mg, 75% yield); mp 224.2 – 225.1 °C; <sup>1</sup>H NMR (400 MHz, CDCl<sub>3</sub>)  $\delta$  7.82 (d,  $J = 7.7$  Hz, 1H), 7.70 – 7.55 (m, 3H), 7.48 – 7.40 (m, 2H), 7.34 – 7.27 (m, 5H), 7.23 – 7.11 (m, 2H), 6.17 (d,  $J = 6.1$  Hz, 1H), 4.24 (d,  $J = 6.0$  Hz, 1H), 1.29 (s, 3H). <sup>13</sup>C NMR (100 MHz, CDCl<sub>3</sub>)  $\delta$  169.5, 140.9, 137.1, 134.0, 132.6, 131.9, 130.9, 129.2, 129.1, 128.7, 128.2, 127.8, 126.3, 121.7, 121.6, 121.5, 106.4, 52.4, 50.2, 22.9. HRMS (ESI)  $m/z$  calcd for [M + Na]<sup>+</sup> C<sub>24</sub>H<sub>18</sub>BrNNaO<sub>3</sub>S: 502.0083; found: 502.0081; HPLC (Daicel Chiralpak IA column, *n*-hexane/*i*-PrOH = 80/20, flow rate = 1.0 mL/min, 254 nm, 25 °C, retention time:  $t_{\text{major}} = 20.663$  min,  $t_{\text{minor}} = 42.583$  min, 97% ee; 15.3:1 dr).

**(8*S*,9*R*)-8-(4-chlorophenyl)-8-methyl-9-phenyl-8,9-dihydro-7*H*-benzo[4,5]isothiazolo[2,3-*a*]pyridin-7-one 5,5-dioxide (3c).**

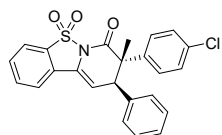

White solid (34.8 mg, 80% yield); mp 149.3 – 150.7 °C; <sup>1</sup>H NMR (400 MHz, CDCl<sub>3</sub>)  $\delta$  7.85 (d,  $J = 7.6$  Hz, 1H), 7.70 – 7.57 (m, 3H), 7.40 – 7.27 (m, 7H), 7.20 – 7.13 (m, 2H), 6.16 (d,  $J = 5.8$  Hz, 1H), 4.24 (d,  $J = 6.0$  Hz, 1H), 1.30 (s, 3H). <sup>13</sup>C NMR (100 MHz, CDCl<sub>3</sub>)  $\delta$  169.5, 140.3, 137.1, 134.0, 133.5, 132.7, 131.0, 129.2, 129.1, 129.0, 128.7, 128.2, 127.5, 126.3, 121.7, 121.6, 106.3, 52.4, 50.4, 23.0. HRMS (ESI)  $m/z$  calcd for [M + Na]<sup>+</sup> C<sub>24</sub>H<sub>18</sub>ClNNaO<sub>3</sub>S: 458.0588; found: 458.0582; HPLC (Daicel Chiralpak IA column, *n*-hexane/*i*-PrOH = 80/20, flow rate = 1.0 mL/min, 254 nm, 25 °C, retention time:  $t_{\text{major}} = 22.913$  min,  $t_{\text{minor}} = 49.327$  min, 98% ee; 9.8:1 dr).

**(8*S*,9*R*)-8-(4-fluorophenyl)-8-methyl-9-phenyl-8,9-dihydro-7*H*-benzo[4,5]isothiazolo[2,3-*a*]pyridin-7-one 5,5-dioxide (3d).**

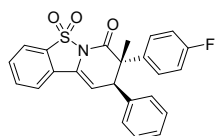

White solid (28.4 mg, 68% yield); mp 129.1 – 130.4 °C; <sup>1</sup>H NMR (400 MHz, CDCl<sub>3</sub>)  $\delta$  7.95 – 7.81 (m, 1H), 7.77 – 7.57 (m, 3H), 7.44 – 7.36 (m, 2H), 7.35 – 7.28 (m, 3H), 7.20 – 7.12 (m, 2H), 7.06 – 6.97 (m, 2H), 6.16 (d,  $J = 5.8$  Hz, 1H), 4.24 (d,  $J = 5.9$  Hz, 1H), 1.31 (s, 3H). <sup>13</sup>C NMR (100 MHz, CDCl<sub>3</sub>)  $\delta$  169.7, 161.9, (d,  $J_{\text{C-F}} = 245.8$  Hz), 137.5 (d,  $J_{\text{C-F}} = 3.3$  Hz), 137.3, 134.0, 132.7, 130.9, 129.2, 129.1, 128.7, 128.2, 127.8 (d,  $J_{\text{C-F}} = 7.9$  Hz), 126.4, 121.6, 115.7 (d,  $J_{\text{C-F}} = 21.2$  Hz), 106.3, 52.2, 50.6, 23.1. <sup>19</sup>F NMR (376 MHz, CDCl<sub>3</sub>)  $\delta$  -114.6. HRMS (ESI)  $m/z$  calcd for [M + Na]<sup>+</sup> C<sub>24</sub>H<sub>18</sub>FNNaO<sub>3</sub>S: 442.0884; found: 442.0880; HPLC (Daicel Chiralpak IA column, *n*-hexane/*i*-PrOH = 80/20, flow rate = 1.0 mL/min, 254 nm, 25 °C, retention time:  $t_{\text{major}} = 17.923$  min,  $t_{\text{minor}} = 40.783$  min, 90% ee; 11.9:1 dr).

**(8*S*,9*R*)-8-methyl-9-phenyl-8-(4-(trifluoromethyl)phenyl)-8,9-dihydro-7*H*-**

**benzo[4,5]isothiazolo[2,3-*a*]pyridin-7-one 5,5-dioxide (3e).**

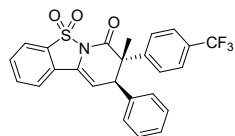

White solid (33.3 mg, 71% yield); mp 197.4 – 198.1 °C; <sup>1</sup>H NMR (400 MHz, CDCl<sub>3</sub>) δ 7.96 – 7.82 (m, 1.03H, major), 7.79 – 7.52 (m, 6.83H, major), 7.44 – 7.28 (m, 3H, major + minor), 7.22 – 7.11 (m, 2H, major + minor), 6.95 (d, *J* = 8.6 Hz, 0.26H, minor), 6.74 (d, *J* = 7.6 Hz, 0.23H, minor), 6.17 (d, *J* = 6.0 Hz, 0.87H, major), 6.11 (d, *J* = 4.4 Hz, 0.14H, minor), 4.30 (d, *J* = 6.0 Hz, 0.87H, major), 3.99 (d, *J* = 4.3 Hz, 0.13H, minor), 1.90 (s, 0.39H, minor), 1.33 (s, 2.62H, major). <sup>13</sup>C NMR (100 MHz, CDCl<sub>3</sub>) δ (major) 169.3, 145.9, 136.9, 134.1, 132.7, 131.0, 130.0 (t, *J*<sub>C-F</sub> = 32.4 Hz), 129.4, 129.3, 129.2, 128.7, 128.3, 126.5, 126.3, 125.8 (q, *J*<sub>C-F</sub> = 3.7 Hz), 121.7, 121.6, 106.2, 52.8, 50.4, 22.9. <sup>19</sup>F NMR (376 MHz, CDCl<sub>3</sub>) δ -62.6. HRMS (ESI) *m/z* calcd for [M + Na]<sup>+</sup> C<sub>25</sub>H<sub>18</sub>F<sub>3</sub>NNaO<sub>3</sub>S: 492.0852; found: 492.0852; HPLC (Daicel Chiralpak AD-H column, *n*-hexane/*i*-PrOH = 80/20, flow rate = 1.0 mL/min, 254 nm, 25 °C, retention time: *t*<sub>major</sub> = 25.383 min, *t*<sub>minor</sub> = 23.490 min, 90% ee; 5.3:1 dr).

**(8*S*,9*R*)-8-methyl-9-phenyl-8-(*p*-tolyl)-8,9-dihydro-7*H*-benzo[4,5]isothiazolo[2,3-*a*]pyridin-7-one 5,5-dioxide (3f).**

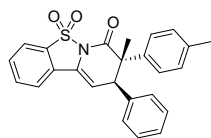

White solid (29.1 mg, 70% yield); mp 191.7 – 192.3 °C; <sup>1</sup>H NMR (400 MHz, CDCl<sub>3</sub>) δ 7.94 – 7.78 (m, 1H, major + minor), 7.76 – 7.53 (m, 3H, major + minor), 7.38 – 7.27 (m, 4H, major + minor), 7.24 – 7.17 (m, 2H, major + minor), 7.16 – 7.10 (m, 2H, major + minor), 6.91 – 6.65 (m, 1H, major + minor), 6.15 (d, *J* = 6.2 Hz, 0.85H, major), 6.04 (d, *J* = 3.9 Hz, 0.12H, minor), 4.27 (d, *J* = 6.2 Hz, 0.87H, major), 4.01 (d, *J* = 4.0 Hz, 0.13H, minor), 2.28 (s, 2.53H, major), 2.22 (s, 0.43H, minor), 1.81 (s, 0.33H, minor), 1.28 (s, 2.59H, major). <sup>13</sup>C NMR (100 MHz, CDCl<sub>3</sub>) δ (major) 170.0, 138.9, 137.7, 137.3, 133.9, 132.7, 130.7, 129.5, 129.1, 128.7, 128.0, 127.2, 126.5, 125.7, 121.6, 121.5, 106.7, 52.4, 50.3, 23.5, 20.9. HRMS (ESI) *m/z* calcd for [M + Na]<sup>+</sup> C<sub>25</sub>H<sub>21</sub>NNaO<sub>3</sub>S: 438.1134; found: 438.1129; HPLC (Daicel Chiralpak AD-H column, *n*-hexane/*i*-PrOH = 75/25, flow rate = 1.0 mL/min, 254 nm, 25 °C, retention time: *t*<sub>major</sub> = 17.540 min, *t*<sub>minor</sub> = 27.380 min, 88% ee; 3.6:1 dr).

**(8*S*,9*R*)-8-(3-bromophenyl)-8-methyl-9-phenyl-8,9-dihydro-7*H*-benzo[4,5]isothiazolo[2,3-*a*]pyridin-7-one 5,5-dioxide (3g).**

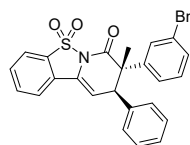

White solid (33.1 mg, 69% yield); mp 87.5 – 88.3 °C; <sup>1</sup>H NMR (400 MHz, CDCl<sub>3</sub>) δ 7.95 – 7.80 (m, 1H, major + minor), 7.78 – 7.54 (m, 4H, major + minor), 7.50 – 7.12 (m, 7H, major + minor), 6.99 – 6.71 (m, 1H, major +

minor), 6.16 (d,  $J = 6.0$  Hz, 0.81H, major), 6.11 (d,  $J = 4.5$  Hz, 0.19H, minor), 4.24 (d,  $J = 6.1$  Hz, 0.84H, major), 3.94 (d,  $J = 4.5$  Hz, 0.19H, minor), 1.85 (s, 0.53H, minor), 1.30 (s, 2.53H, major).  $^{13}\text{C}$  NMR (100 MHz,  $\text{CDCl}_3$ )  $\delta$  (major) 169.3, 144.2, 137.0, 134.0, 132.7, 131.0, 130.9, 130.4, 129.2, 129.1, 129.0, 128.7, 128.2, 126.3, 124.8, 122.9, 121.7, 121.6, 106.2, 52.6, 50.3, 23.0. HRMS (ESI)  $m/z$  calcd for  $[\text{M} + \text{Na}]^+ \text{C}_{24}\text{H}_{18}\text{BrNNaO}_3\text{S}$ : 502.0083; found: 502.0081; HPLC (Daicel Chiralpak AD-H column, *n*-hexane/*i*-PrOH = 80/20, flow rate = 1.0 mL/min, 254 nm, 25 °C, retention time:  $t_{\text{major}} = 28.697$  min,  $t_{\text{minor}} = 66.607$  min, 91% ee; 6.5:1 dr).

**(8*S*,9*R*)-8-(3-chlorophenyl)-8-methyl-9-phenyl-8,9-dihydro-7*H*-benzo[4,5]isothiazolo[2,3-*a*]pyridin-7-one 5,5-dioxide (3h).**

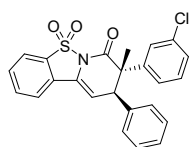

White solid (33.4 mg, 77% yield); mp 102.6 – 103.6 °C;  $^1\text{H}$  NMR (400 MHz,  $\text{CDCl}_3$ )  $\delta$  7.95 – 7.80 (m, 1H), 7.78 – 7.57 (m, 3H), 7.45 – 7.40 (m, 1H), 7.35 – 7.27 (m, 4H), 7.25 – 7.12 (m, 4H), 6.17 (d,  $J = 6.0$  Hz, 1H), 4.25 (d,  $J = 6.0$  Hz, 1H), 1.30 (s, 3H).  $^{13}\text{C}$  NMR (100 MHz,  $\text{CDCl}_3$ )  $\delta$  169.3, 143.9, 137.0, 134.7, 134.0, 132.7, 131.0, 130.2, 129.3, 129.1, 128.7, 128.2, 127.9, 126.4, 126.2, 124.4, 121.7(1), 121.6(7), 106.2, 52.6, 50.4, 23.0. HRMS (ESI)  $m/z$  calcd for  $[\text{M} + \text{Na}]^+ \text{C}_{24}\text{H}_{18}\text{ClNNaO}_3\text{S}$ : 458.0588; found: 458.0581; HPLC (Daicel Chiralpak AD-H column, *n*-hexane/*i*-PrOH = 75/25, flow rate = 1.0 mL/min, 254 nm, 25 °C, retention time:  $t_{\text{major}} = 19.817$  min,  $t_{\text{minor}} = 47.400$  min, 98% ee; 16.5:1 dr).

**(8*S*,9*R*)-8-(3-fluorophenyl)-8-methyl-9-phenyl-8,9-dihydro-7*H*-benzo[4,5]isothiazolo[2,3-*a*]pyridin-7-one 5,5-dioxide (3i).**

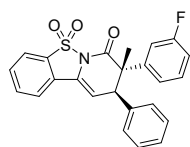

White solid (31.8 mg, 76% yield); mp 108.7 – 109.4 °C;  $^1\text{H}$  NMR (400 MHz,  $\text{CDCl}_3$ )  $\delta$  7.96 – 7.81 (m, 1H, major + minor), 7.78 – 7.57 (m, 3H, major + minor), 7.37 – 7.11 (m, 7H, major + minor), 7.11 – 6.91 (m, 1H, major + minor), 6.89 – 6.47 (m, 1H, major + minor), 6.17 (d,  $J = 6.0$  Hz, 0.85H, major), 6.09 (d,  $J = 4.3$  Hz, 0.17H, minor), 4.24 (d,  $J = 6.1$  Hz, 0.85H, major), 3.98 (d,  $J = 4.4$  Hz, 0.16H, minor), 1.85 (s, 0.49H, minor), 1.31 (s, 2.53H, major).  $^{13}\text{C}$  NMR (100 MHz,  $\text{CDCl}_3$ )  $\delta$  (major) 169.4, 162.8 (d,  $J_{\text{C-F}} = 245.0$  Hz), 144.4 (d,  $J_{\text{C-F}} = 6.9$  Hz), 137.1, 134.0, 132.7, 130.9, 130.4 (d,  $J_{\text{C-F}} = 8.3$  Hz), 129.2, 129.1, 128.7, 128.2, 126.4, 121.8 (d,  $J_{\text{C-F}} = 2.9$  Hz), 121.7, 121.6, 114.7 (d,  $J_{\text{C-F}} = 20.8$  Hz), 113.4 (d,  $J_{\text{C-F}} = 22.9$  Hz), 106.3, 52.6, 50.4, 23.0.  $^{19}\text{F}$  NMR (376 MHz,  $\text{CDCl}_3$ )  $\delta$  -111.6. HRMS (ESI)  $m/z$  calcd for  $[\text{M} + \text{Na}]^+ \text{C}_{24}\text{H}_{18}\text{FNNaO}_3\text{S}$ : 442.0884; found: 442.0884; HPLC (Daicel Chiralpak IA column, *n*-hexane/*i*-PrOH = 80/20, flow rate = 1.0 mL/min, 254 nm, 25 °C, retention time:  $t_{\text{major}} = 19.560$  min,  $t_{\text{minor}} = 58.523$  min, 90% ee; 6.1:1 dr).

**(8*S*,9*R*)-8-methyl-9-phenyl-8-(*m*-tolyl)-8,9-dihydro-7*H*-benzo[4,5]isothiazolo[2,3-*a*]pyridin-7-**

**one 5,5-dioxide (3j).**

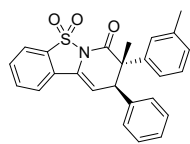

White solid (30.3 mg, 73% yield); mp 97.7 – 98.6 °C; <sup>1</sup>H NMR (400 MHz, CDCl<sub>3</sub>) δ 7.95 – 7.78 (m, 1H), 7.75 – 7.52 (m, 3H), 7.36 – 7.11 (m, 8H), 7.09 – 6.92 (m, 1H), 6.14 (d, *J* = 6.2 Hz, 1H), 4.29 (d, *J* = 6.2 Hz, 1H), 2.32 (s, 3H), 1.29 (s, 3H). <sup>13</sup>C NMR (100 MHz, CDCl<sub>3</sub>) δ 170.0, 142.0, 138.5, 137.6, 133.9, 132.7, 130.7, 129.8, 129.1, 128.7, 128.6, 128.4, 128.0, 126.5(3), 126.5(1), 122.7, 121.7, 121.5, 106.7, 52.7, 50.4, 23.5, 21.6. HRMS (ESI) *m/z* calcd for [M + Na]<sup>+</sup> C<sub>25</sub>H<sub>21</sub>NNaO<sub>3</sub>S: 438.1134; found: 438.1129; HPLC (Daicel Chiralpak OD-H column, *n*-hexane/*i*-PrOH = 80/20, flow rate = 1.0 mL/min, 254 nm, 25 °C, retention time: *t*<sub>major</sub> = 13.893 min, *t*<sub>minor</sub> = 40.057 min, 89% ee; 9.1:1 dr).

**(8S,9R)-8-(3-methoxyphenyl)-8-methyl-9-phenyl-8,9-dihydro-7H-benzo[4,5]isothiazolo[2,3-a]pyridin-7-one 5,5-dioxide (3k).**

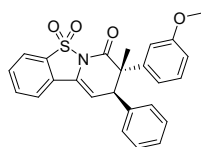

White solid (30.6 mg, 71% yield); mp 81.9 – 82.5 °C; <sup>1</sup>H NMR (400 MHz, CDCl<sub>3</sub>) δ 7.94 – 7.80 (m, 1H, major + minor), 7.76 – 7.54 (m, 3H, major + minor), 7.36 – 7.14 (m, 6H, major + minor), 7.10 – 6.96 (m, 2H, major + minor), 6.83 – 6.66 (m, 1H, major + minor), 6.14 (d, *J* = 6.4 Hz, 0.88H, major), 6.06 (d, *J* = 3.9 Hz, 0.12H, minor), 4.28 (d, *J* = 6.2 Hz, 0.9H, major), 4.01 (d, *J* = 3.9 Hz, 0.1H, minor), 3.76 (s, 2.71H, major), 3.49 (s, 0.33H, minor), 1.83 (s, 0.28H, minor), 1.29 (s, 2.81H, major). <sup>13</sup>C NMR (100 MHz, CDCl<sub>3</sub>) δ (major) 169.8, 159.8, 143.7, 137.5, 133.9, 132.8, 130.8, 129.8, 129.1, 128.7, 128.1, 128.0, 126.5, 121.7, 121.6, 118.0, 113.0, 111.8, 106.6, 55.3, 52.8, 50.5, 23.5. HRMS (ESI) *m/z* calcd for [M + Na]<sup>+</sup> C<sub>25</sub>H<sub>21</sub>NNaO<sub>4</sub>S: 454.1084; found: 454.1080; HPLC (Daicel Chiralpak IA column, *n*-hexane/*i*-PrOH = 80/20, flow rate = 1.0 mL/min, 254 nm, 25 °C, retention time: *t*<sub>major</sub> = 23.523 min, *t*<sub>minor</sub> = 31.207 min, 94% ee; 11.2:1 dr).

**(8S,9R)-8-(3,4-dichlorophenyl)-8-methyl-9-phenyl-8,9-dihydro-7H-benzo[4,5]isothiazolo[2,3-a]pyridin-7-one 5,5-dioxide (3l).**

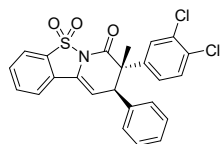

White solid (31.4 mg, 67% yield); mp 90.3 – 91.5 °C; <sup>1</sup>H NMR (400 MHz, CDCl<sub>3</sub>) δ 7.85 (d, *J* = 7.7 Hz, 1H), 7.73 – 7.58 (m, 3H), 7.51 (d, *J* = 2.3 Hz, 1H), 7.44 – 7.22 (m, 5H), 7.19 – 7.12 (m, 2H), 6.18 (d, *J* = 5.8 Hz, 1H), 4.22 (d, *J* = 5.8 Hz, 1H), 1.30 (s, 3H). <sup>13</sup>C NMR (100 MHz, CDCl<sub>3</sub>) δ 169.0, 142.0, 136.7, 134.1, 132.9, 132.6, 131.9, 131.1, 130.7, 129.3, 129.2, 128.7, 128.3, 128.2, 126.2, 125.8, 121.7(5), 121.6(8), 106.0, 52.3, 50.2, 22.7. HRMS (ESI) *m/z* calcd for [M + Na]<sup>+</sup> C<sub>24</sub>H<sub>17</sub>Cl<sub>2</sub>NNaO<sub>3</sub>S: 492.0198; found: 492.0195; HPLC (Daicel Chiralpak AD-H column, *n*-hexane/*i*-PrOH = 75/25, flow rate = 1.0 mL/min, 254 nm, 25 °C, retention time: *t*<sub>major</sub> = 16.457 min, *t*<sub>minor</sub> = 22.213 min, 99% ee; >20:1 dr).



**(8*S*,9*R*)-8-methyl-8-(naphthalen-2-yl)-9-phenyl-8,9-dihydro-7*H*-benzo[4,5]isothiazolo[2,3-*a*]pyridin-7-one 5,5-dioxide (3m).**

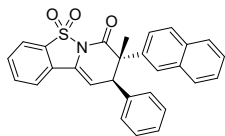

White solid (32.0 mg, 71% yield); mp 212.5 – 213.8 °C; <sup>1</sup>H NMR (400 MHz, CDCl<sub>3</sub>) δ 7.98 – 7.94 (m, 0.23H, minor), 7.88 – 7.65 (m, 5H, major + minor), 7.64 – 7.52 (m, 3H, major + minor), 7.51 – 7.28 (m, 5H, major + minor), 7.25 – 7.15 (m, 1H, major + minor), 7.12 – 6.99 (m, 1H, major + minor), 6.80 – 6.73 (m, 0.61H, major), 6.17 (d, *J* = 6.2 Hz, 0.77H, major), 6.09 (d, *J* = 4.2 Hz, 0.2H, minor), 4.44 (d, *J* = 6.2 Hz, 0.77H, major), 4.07 (d, *J* = 4.0 Hz, 0.24H, minor), 1.96 (s, 0.59H, minor), 1.39 (s, 2.24H, major). <sup>13</sup>C NMR (100 MHz, CDCl<sub>3</sub>) δ (major) 170.0, 139.2, 137.5, 133.9, 133.1, 132.7, 132.5, 130.8, 129.8, 129.2, 128.8, 128.7, 128.3, 128.1, 128.0, 127.4, 126.3, 125.8, 124.9, 123.8, 121.7, 121.6, 106.5, 52.9, 50.3, 23.2. HRMS (ESI) *m/z* calcd for [M + Na]<sup>+</sup> C<sub>28</sub>H<sub>21</sub>NNaO<sub>3</sub>S: 474.1134; found: 474.1131; HPLC (Daicel Chiralpak AD-H column, *n*-hexane/*i*-PrOH = 75/25, flow rate = 1.0 mL/min, 254 nm, 25 °C, retention time: *t*<sub>major</sub> = 32.080 min, *t*<sub>minor</sub> = 51.340 min, 93% ee; 7.0:1 dr).

**(8*S*,9*R*)-8-ethyl-8,9-diphenyl-8,9-dihydro-7*H*-benzo[4,5]isothiazolo[2,3-*a*]pyridin-7-one 5,5-dioxide (3n).**

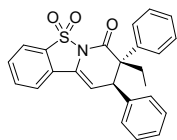

White solid (27.4 mg, 66% yield); mp 86.7 – 87.3 °C; <sup>1</sup>H NMR (400 MHz, CDCl<sub>3</sub>) δ 7.95 – 7.89 (m, 0.41H, minor), 7.82 – 7.71 (m, 1H, major + minor), 7.70 – 7.51 (m, 2H, major + minor), 7.46 - 7.39 (m, 1H, major + minor), 7.39 – 7.20 (m, 6H, major + minor), 7.14 – 7.01 (m, 2H, major + minor), 6.98 – 6.92 (m, 1H, major + minor), 6.73 - 6.67 (m, 0.6H, major), 6.20 (d, *J* = 6.2 Hz, 0.68H, major), 6.16 (d, *J* = 5.4 Hz, 0.38H, minor), 4.35 (d, *J* = 6.4 Hz, 0.68H, major), 3.90 (d, *J* = 5.4 Hz, 0.39H, minor), 2.50 – 2.33 (m, 0.65H, minor), 1.66 – 1.48 (m, 1.33H, major), 1.05 (t, *J* = 7.2 Hz, 0.94H, minor), 0.59 (t, *J* = 7.3 Hz, 2.04H, major). <sup>13</sup>C NMR (100 MHz, CDCl<sub>3</sub>) δ (major + minor) 169.8, 168.5, 166.5, 138.1, 137.9, 137.7, 136.2, 134.1, 133.8, 132.8, 132.7, 130.9, 130.6, 129.2, 128.8, 128.7, 128.6(1), 128.5(8), 128.5, 128.3, 128.2, 128.0, 127.6(5), 127.5(8), 127.4, 127.1, 126.8, 126.6, 126.3, 121.8, 121.6, 121.5, 107.0, 106.3, 57.5, 55.9, 52.9, 47.3, 29.1, 27.1, 9.3, 8.2. HRMS (ESI) *m/z* calcd for [M + Na]<sup>+</sup> C<sub>25</sub>H<sub>21</sub>NNaO<sub>3</sub>S: 438.1143; found: 438.1134; HPLC (Daicel Chiralpak OD-H column, *n*-hexane/*i*-PrOH = 80/20, flow rate = 1.0 mL/min, 254 nm, 25 °C, retention time: *t*<sub>major</sub> = 10.970 min, *t*<sub>minor</sub> = 27.817 min, 89% ee; 3.5:1 dr).

**(8*S*,9*R*)-9-(4-bromophenyl)-8-(4-chlorophenyl)-8-methyl-8,9-dihydro-7*H*-benzo[4,5]isothiazolo[2,3-*a*]pyridin-7-one 5,5-dioxide (3o).**

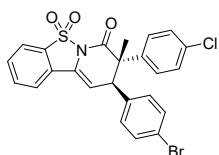

White solid (35.8 mg, 70% yield); mp 234.6 – 235.3 °C; <sup>1</sup>H NMR (400 MHz, CDCl<sub>3</sub>) δ 7.86 (d, *J* = 8.3 Hz, 1H), 7.72 – 7.59 (m, 3H), 7.44 (d, *J* = 8.4 Hz, 2H), 7.36 – 7.28 (m, 4H), 7.02 (d, *J* = 8.4 Hz, 2H), 6.11 (d, *J* = 5.9 Hz, 1H), 4.22 (d, *J* = 5.7 Hz, 1H), 1.30 (s, 3H). <sup>13</sup>C NMR (100 MHz, CDCl<sub>3</sub>) δ 169.2, 139.9, 136.1, 134.1, 133.7, 132.8, 132.2, 131.2, 130.4, 129.6, 129.0, 128.8, 127.5, 126.1, 122.2, 121.7, 105.5, 52.2, 49.8, 22.7. HRMS (ESI) *m/z* calcd for [M + Na]<sup>+</sup> C<sub>24</sub>H<sub>17</sub>BrClNNaO<sub>3</sub>S: 535.9693; found: 535.9694; HPLC (Daicel Chiralpak IA column, *n*-hexane/*i*-PrOH = 80/20, flow rate = 1.0 mL/min, 254 nm, 25 °C, retention time: *t*<sub>major</sub> = 27.290 min, *t*<sub>minor</sub> = 37.370 min, 95% ee; >20:1 dr).

**(8*S*,9*R*)-8,9-bis(4-chlorophenyl)-8-methyl-8,9-dihydro-7*H*-benzo[4,5]isothiazolo[2,3-*a*]pyridin-7-one 5,5-dioxide (3p).**

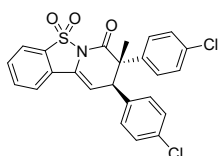

White solid (31.9 mg, 68% yield); mp 237.6 – 238.9 °C; <sup>1</sup>H NMR (400 MHz, CDCl<sub>3</sub>) δ 7.85 (d, *J* = 7.7 Hz, 1H), 7.72 – 7.59 (m, 3H), 7.36 – 7.27 (m, 6H), 7.08 (d, *J* = 8.1 Hz, 2H), 6.12 (d, *J* = 5.8 Hz, 1H), 4.23 (d, *J* = 5.8 Hz, 1H), 1.30 (s, 3H). <sup>13</sup>C NMR (100 MHz, CDCl<sub>3</sub>) δ 169.3, 139.9, 135.6, 134.1, 133.6, 132.7, 131.1, 130.1, 129.5, 129.2, 129.0, 128.8, 127.5, 126.2, 121.7(2), 121.6(7), 105.6, 52.3, 49.7, 22.6. HRMS (ESI) *m/z* calcd for [M + Na]<sup>+</sup> C<sub>24</sub>H<sub>17</sub>Cl<sub>2</sub>NNaO<sub>3</sub>S: 492.0198; found: 492.0195; HPLC (Daicel Chiralpak IA column, *n*-hexane/*i*-PrOH = 80/20, flow rate = 1.0 mL/min, 254 nm, 25 °C, retention time: *t*<sub>major</sub> = 24.933 min, *t*<sub>minor</sub> = 34.830 min, 95% ee; >20:1 dr).

**(8*S*,9*R*)-8-(4-chlorophenyl)-8-methyl-9-(naphthalen-2-yl)-8,9-dihydro-7*H*-benzo[4,5]isothiazolo[2,3-*a*]pyridin-7-one 5,5-dioxide (3q).**

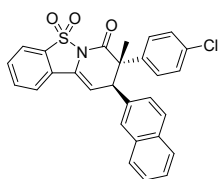

White solid (31.5 mg, 65% yield); mp 181.3 – 182.9 °C; <sup>1</sup>H NMR (400 MHz, CDCl<sub>3</sub>) δ 7.89 – 7.74 (m, 4H), 7.70 – 7.57 (m, 4H), 7.52 – 7.44 (m, 2H), 7.43 – 7.36 (m, 2H), 7.34 – 7.28 (m, 2H), 7.25 – 7.20 (m, 1H), 6.20 (d, *J* = 5.9 Hz, 1H), 4.40 (d, *J* = 5.9 Hz, 1H), 1.33 (s, 3H). <sup>13</sup>C NMR (100 MHz, CDCl<sub>3</sub>) δ 169.6, 140.3, 134.6, 134.0, 133.5, 133.3, 132.9, 132.8, 131.0, 129.3, 129.1, 129.0, 128.8, 128.0, 127.9, 127.6, 127.5, 126.6, 126.4, 126.0, 121.7, 121.6, 106.2, 52.4, 50.6, 23.0. HRMS (ESI) *m/z* calcd for [M + Na]<sup>+</sup> C<sub>28</sub>H<sub>20</sub>ClNNaO<sub>3</sub>S: 508.0745; found: 508.0742; HPLC (Daicel Chiralpak IA column, *n*-hexane/*i*-PrOH = 80/20, flow rate = 1.0 mL/min, 254 nm, 25 °C, retention time: *t*<sub>major</sub> = 27.670 min, *t*<sub>minor</sub> = 61.177 min, 84% ee; >20:1 dr).

## 5. NMR Spectra

$^1\text{H}$  NMR spectrum of compound (**3a**)

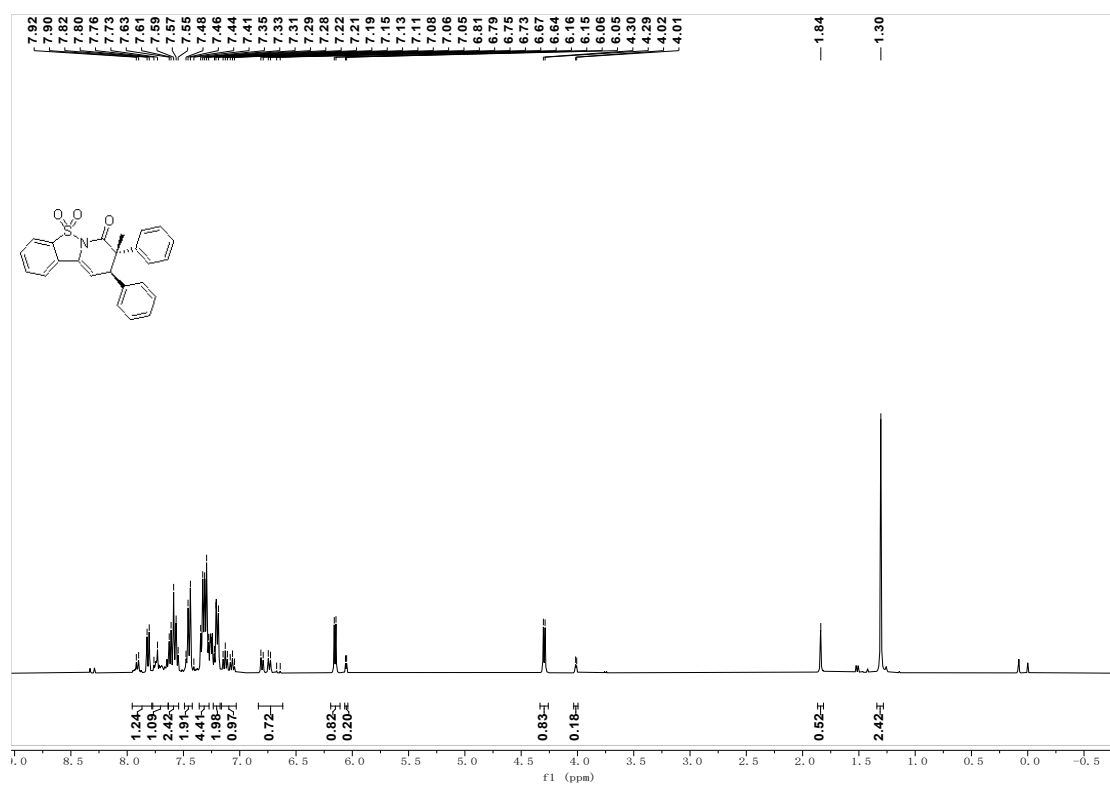

$^{13}\text{C}$  NMR spectrum of compound (**3a**)

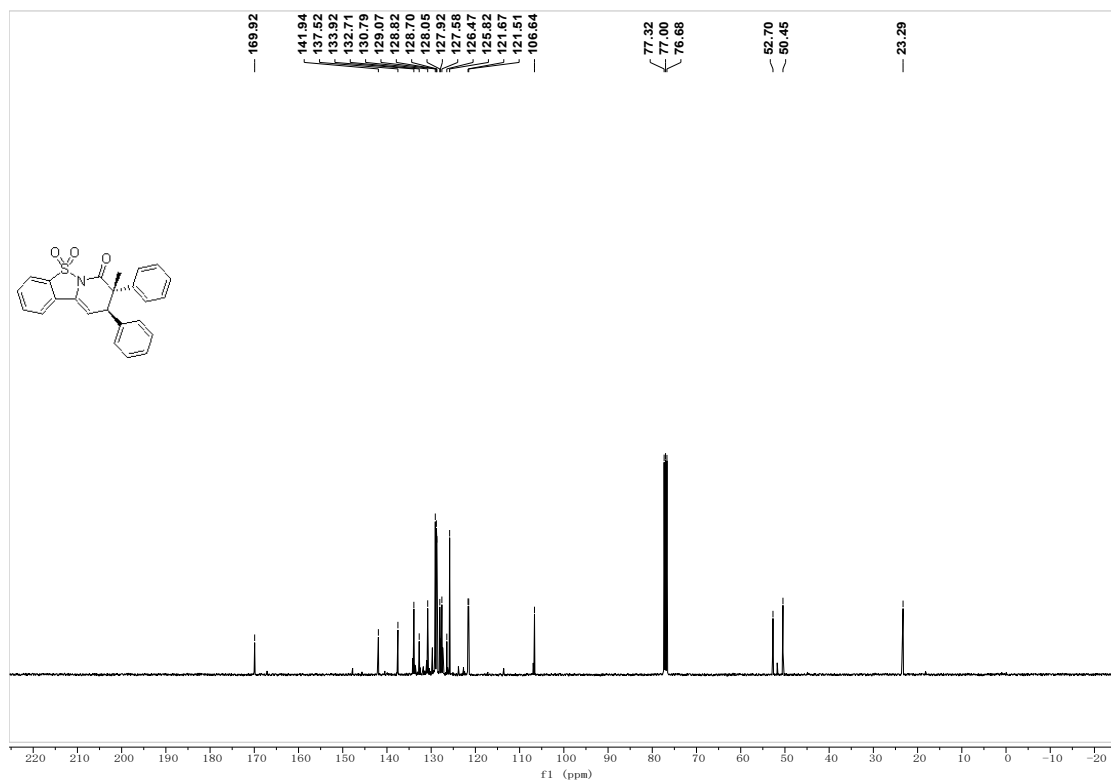

<sup>1</sup>H NMR spectrum of compound (3b)

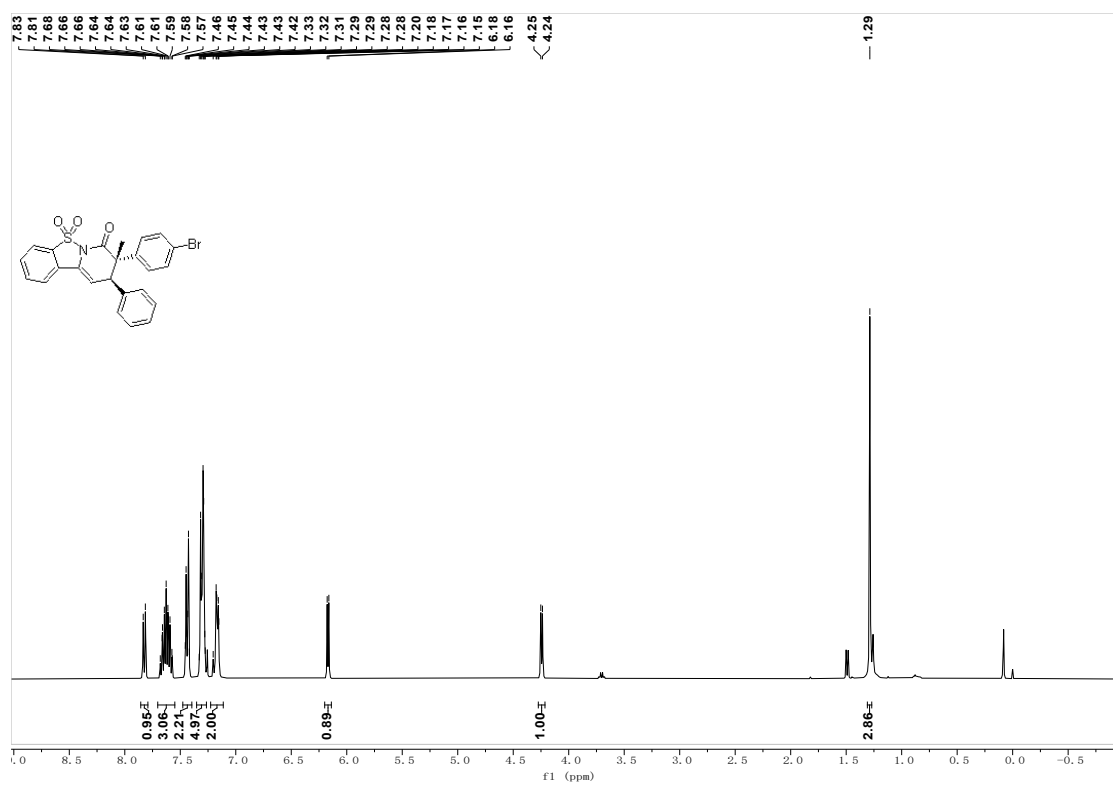

<sup>13</sup>C NMR spectrum of compound (3b)

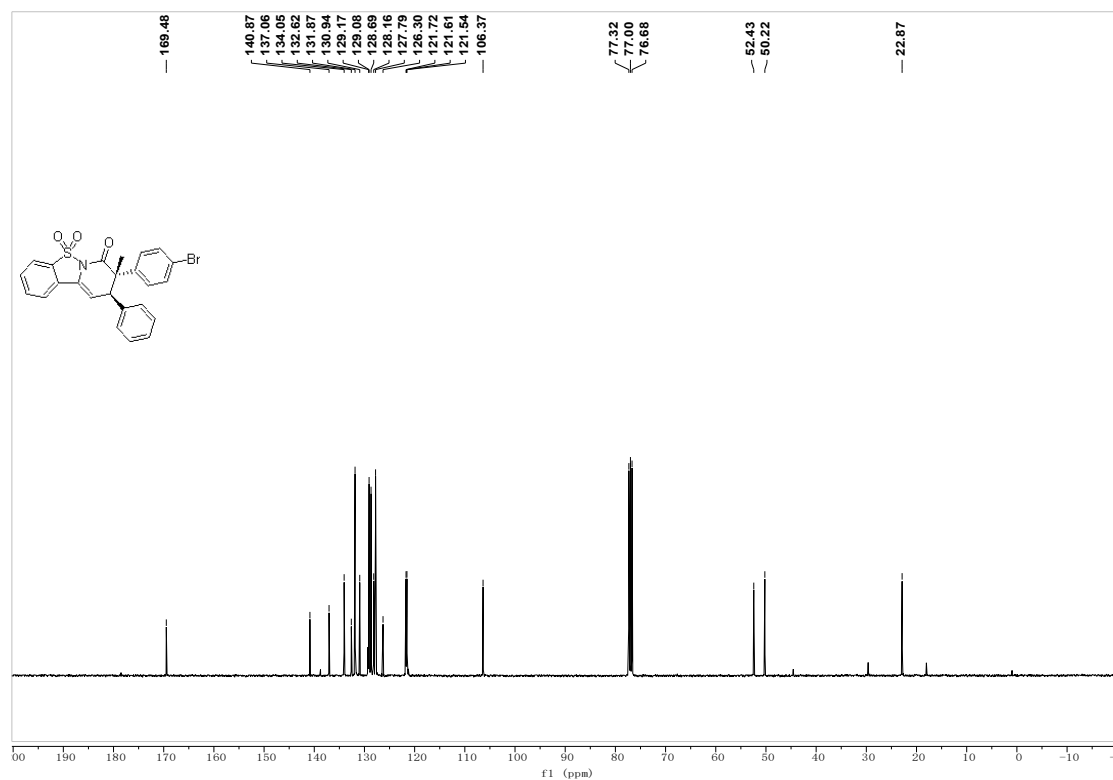

<sup>1</sup>H NMR spectrum of compound (3c)

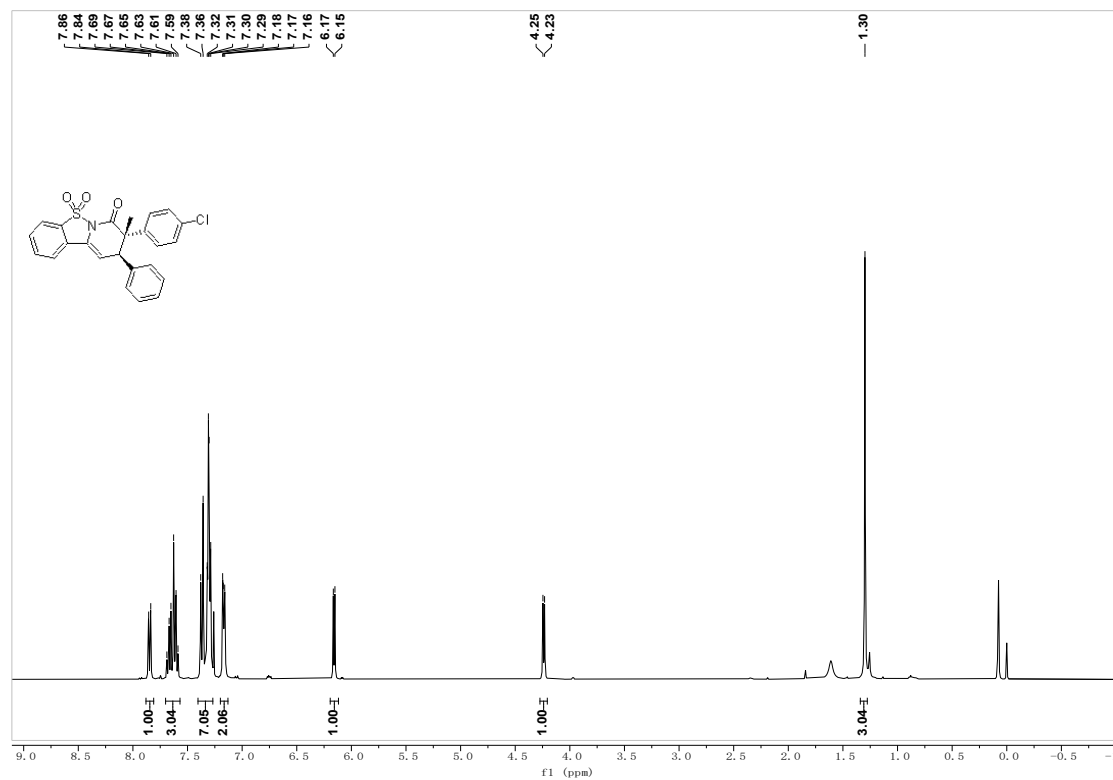

<sup>13</sup>C NMR spectrum of compound (3c)

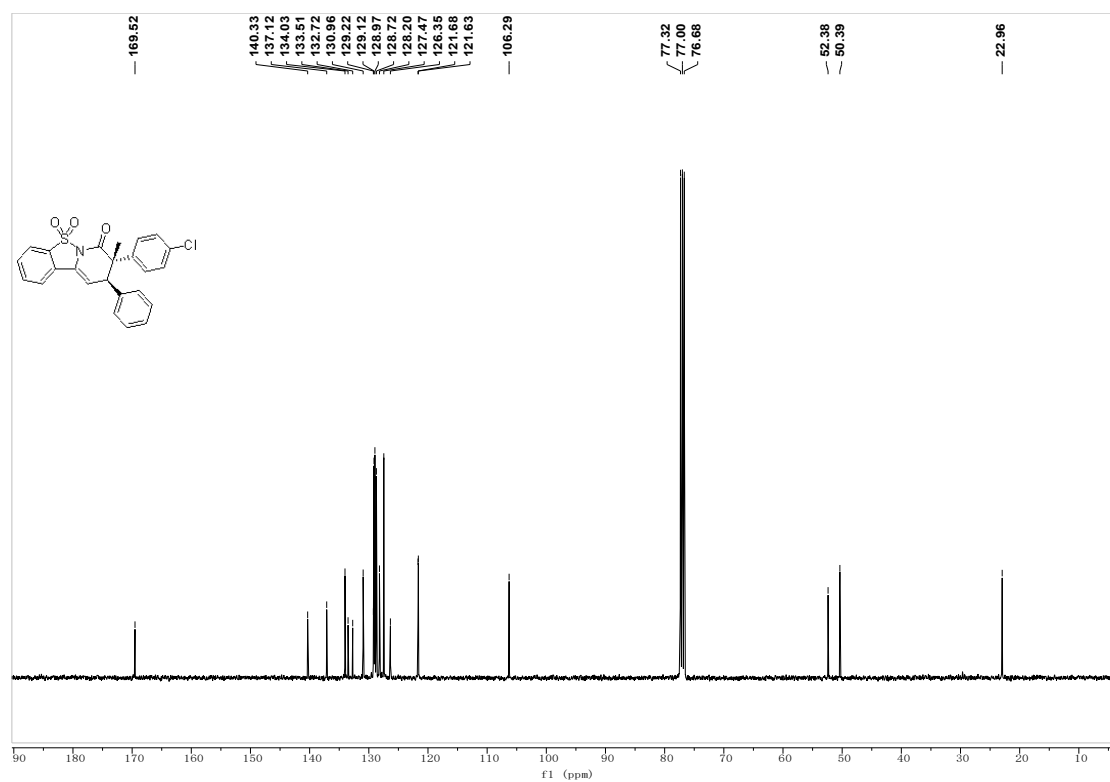

<sup>1</sup>H NMR spectrum of compound (3d)

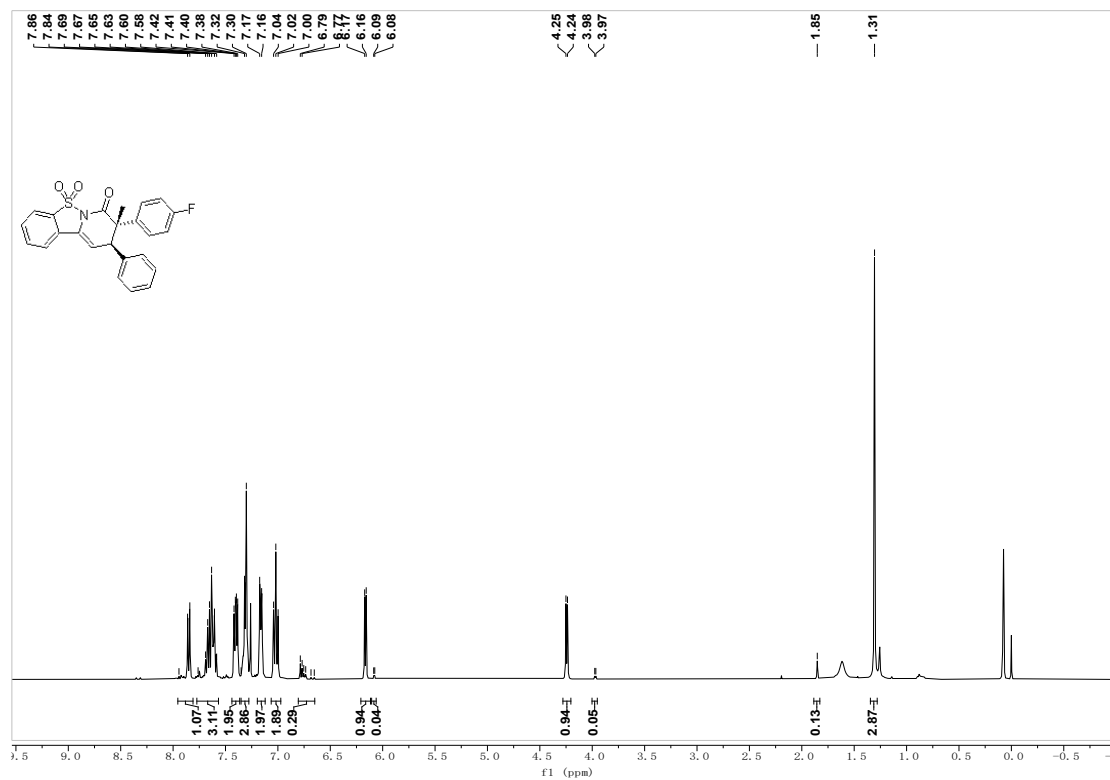

<sup>13</sup>C NMR spectrum of compound (3d)

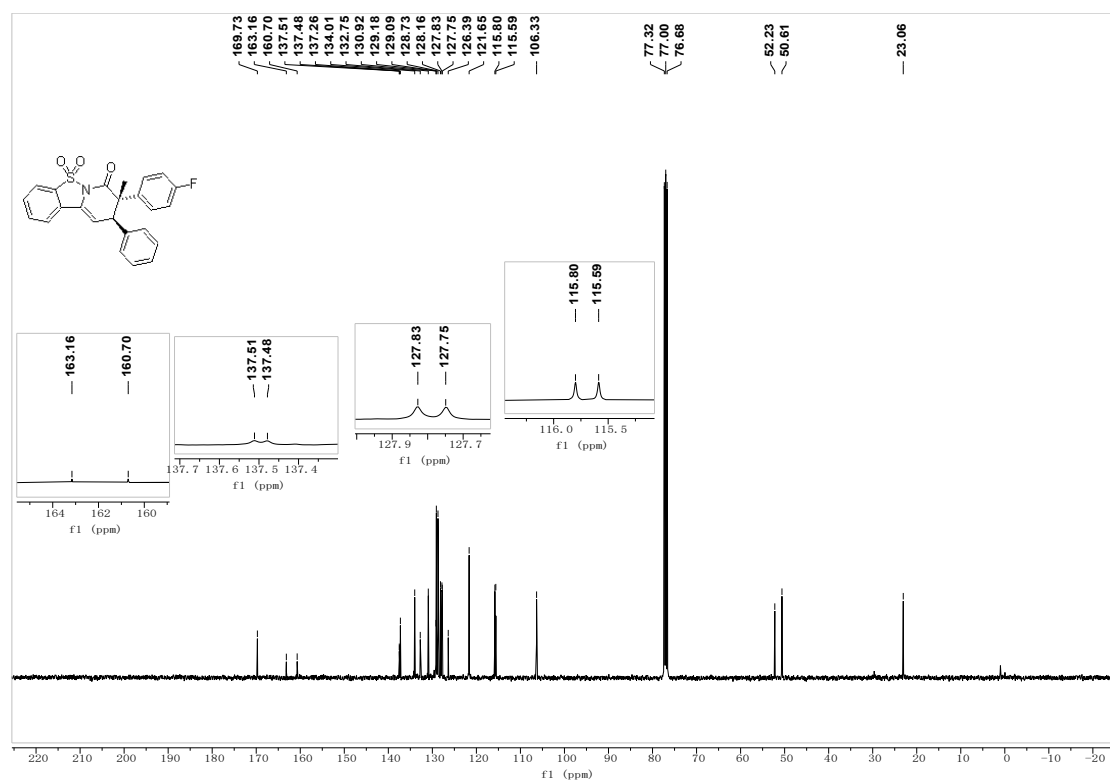

<sup>19</sup>F NMR spectrum of compound (3d)

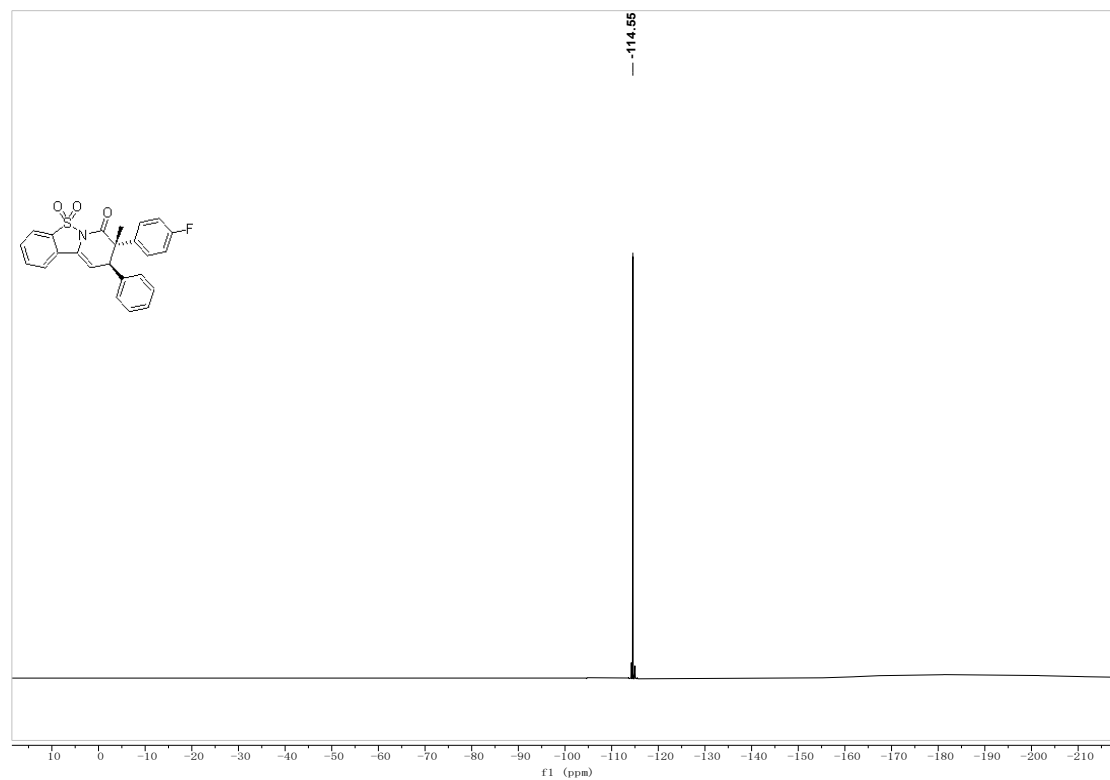

<sup>1</sup>H NMR spectrum of compound (3e)

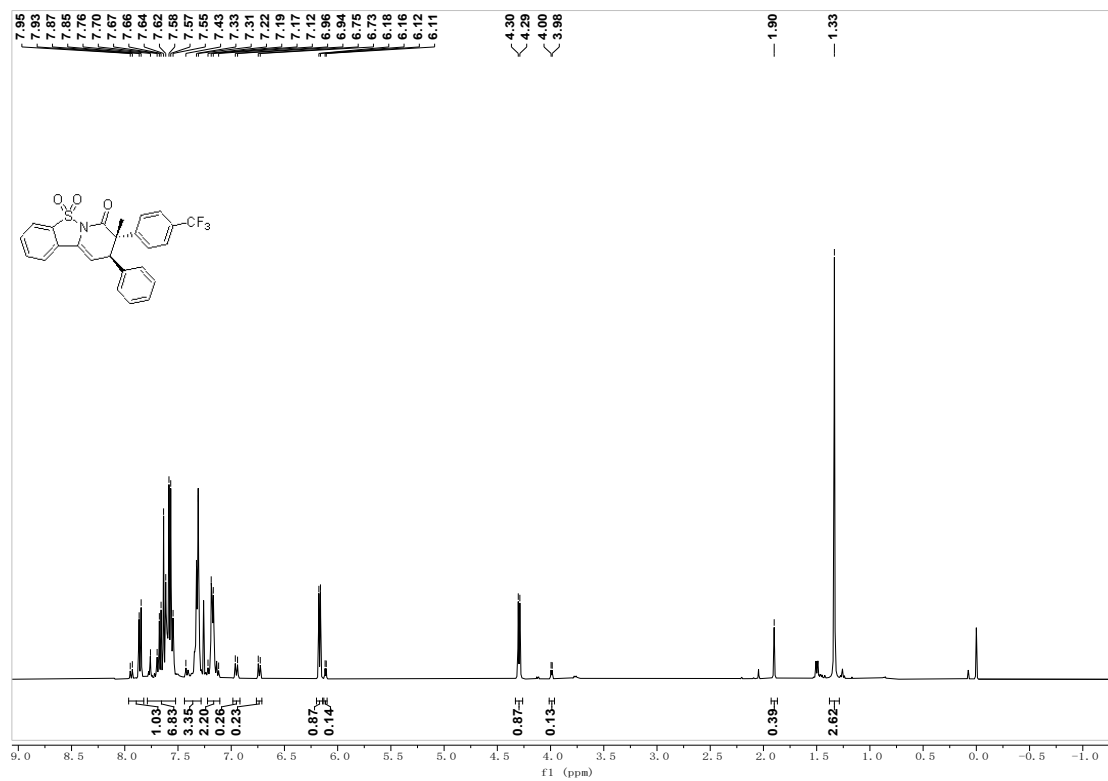

<sup>13</sup>C NMR spectrum of compound (3e)

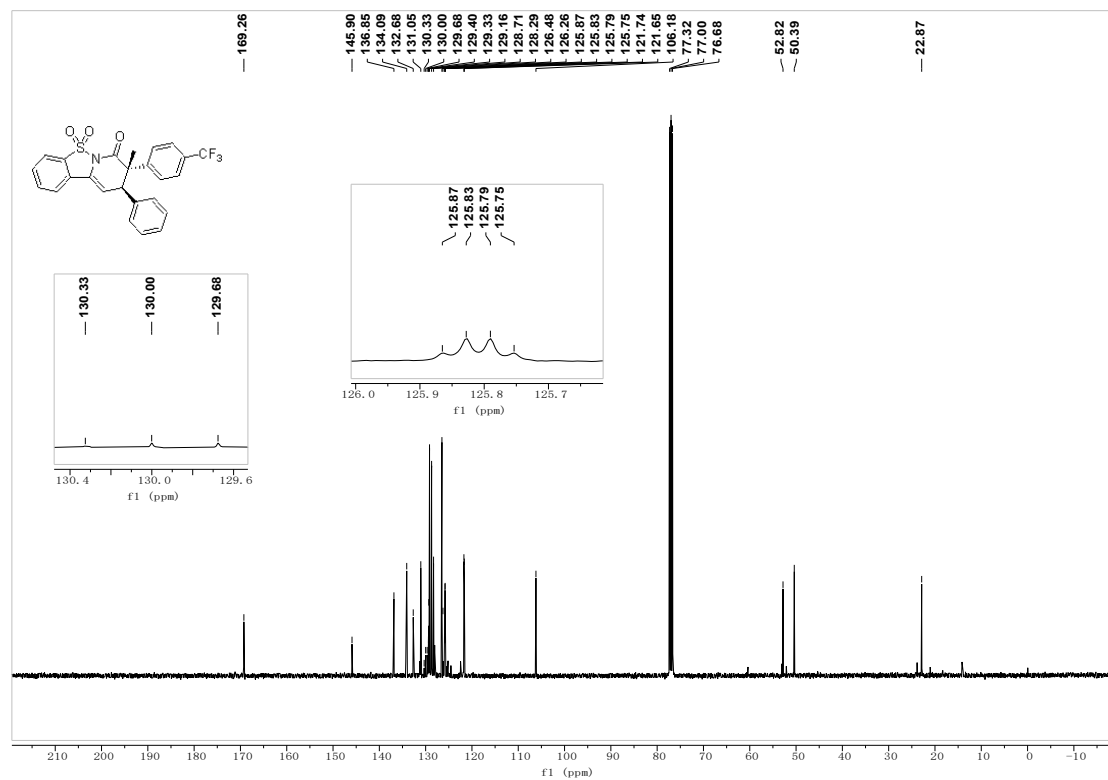



$^{19}\text{F}$  NMR spectrum of compound (3e)

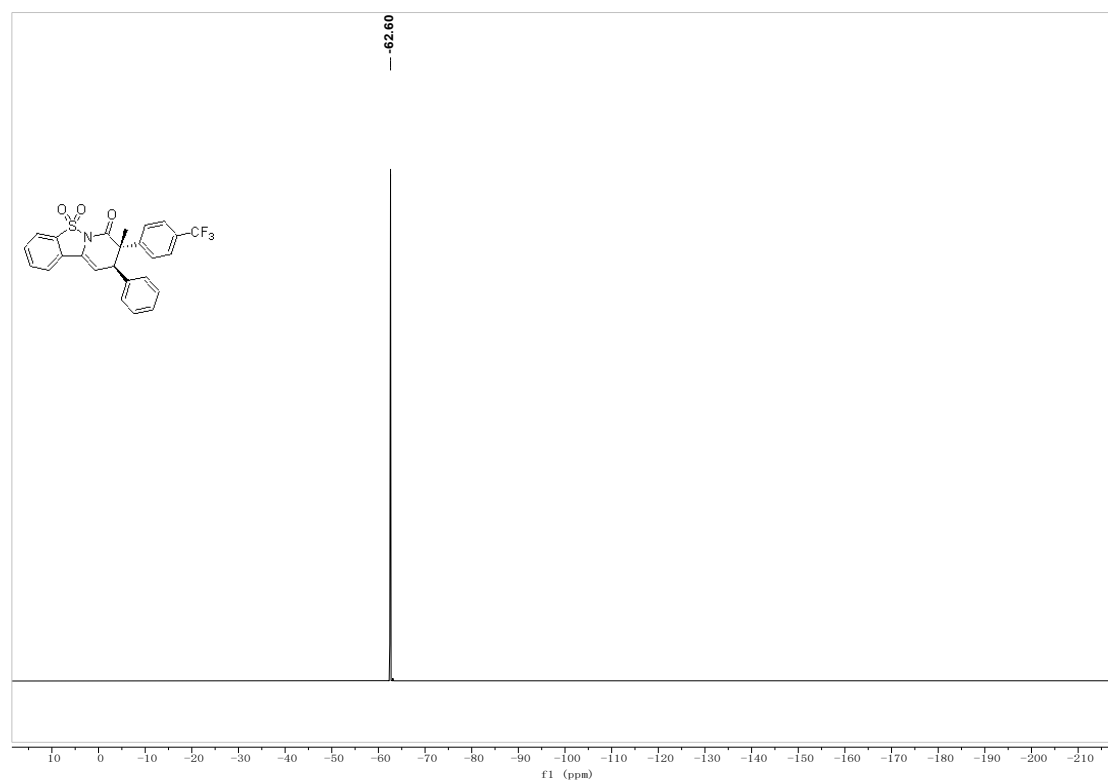

$^1\text{H}$  NMR spectrum of compound (3f)

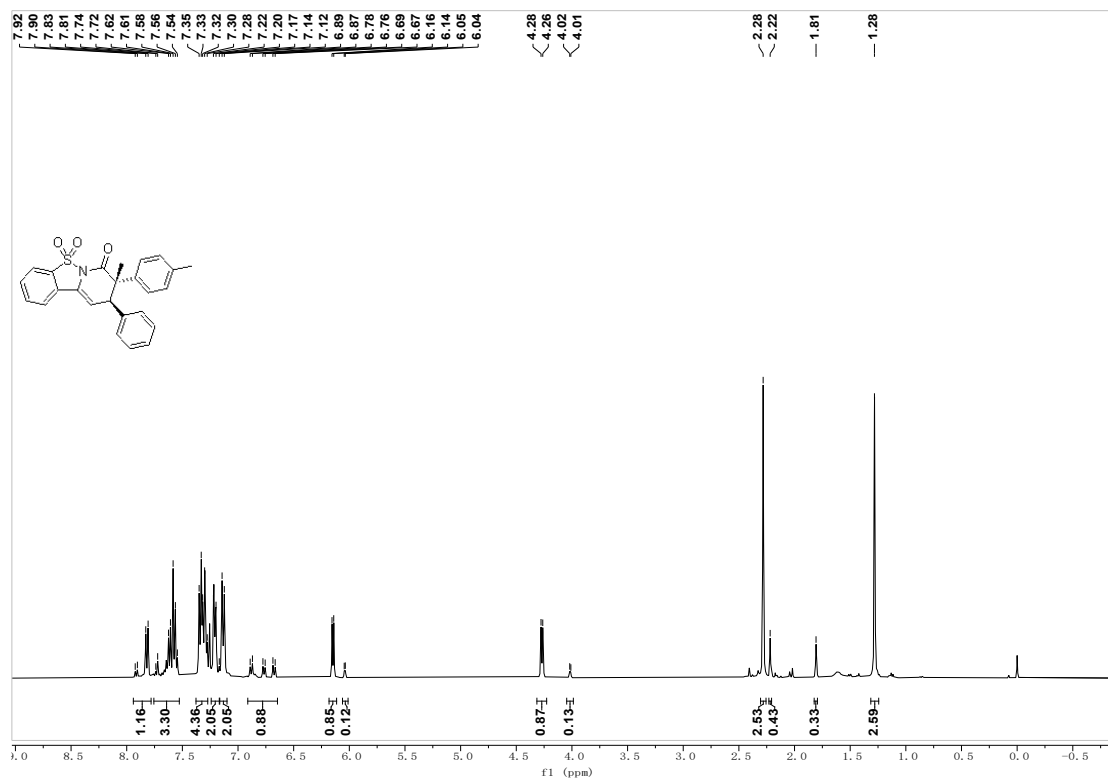

<sup>13</sup>C NMR spectrum of compound (**3f**)

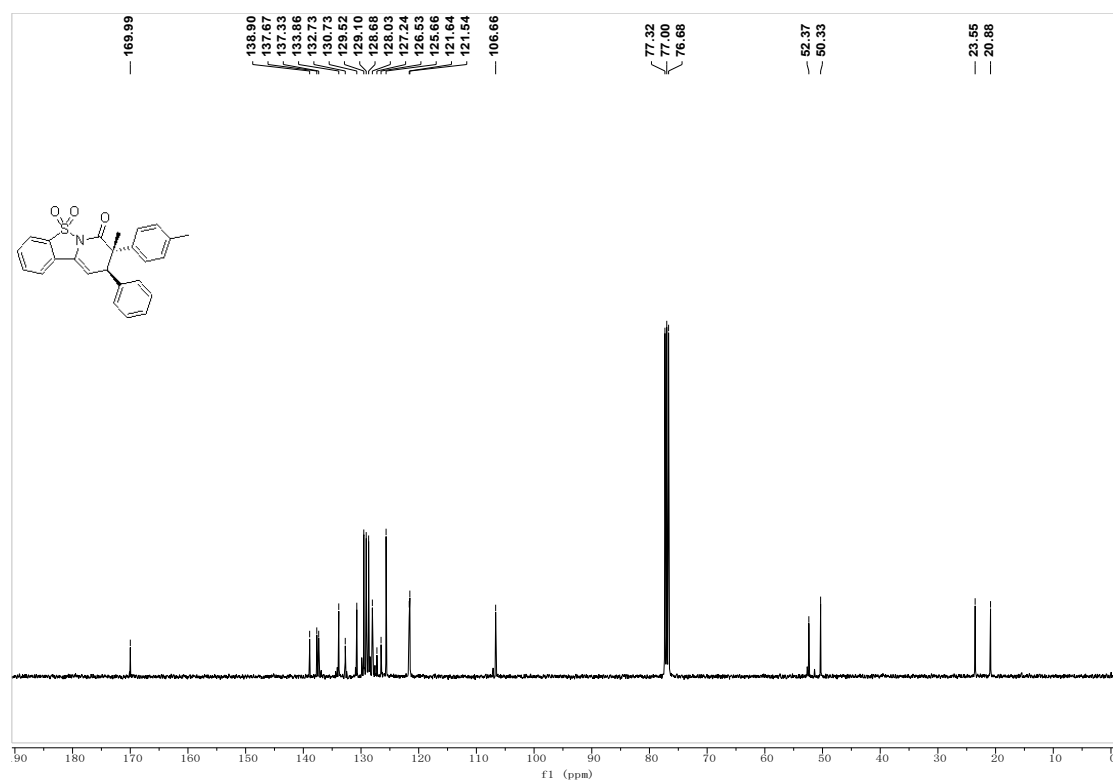

<sup>1</sup>H NMR spectrum of compound (**3g**)

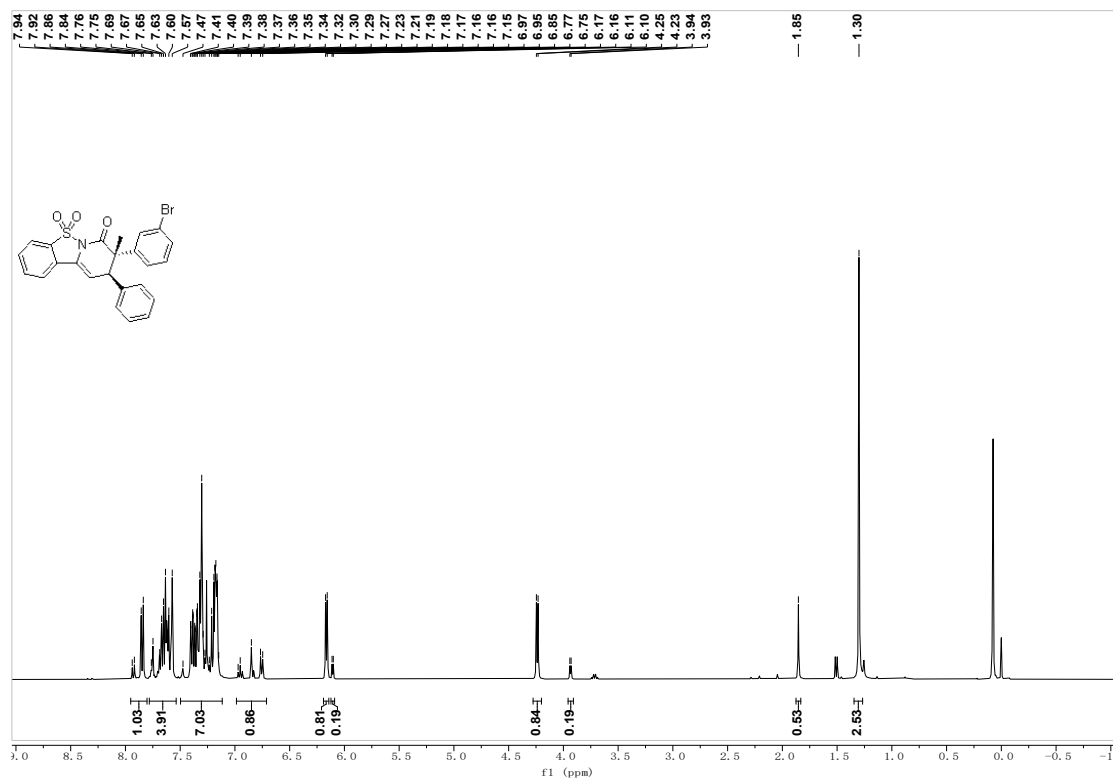

$^{13}\text{C}$  NMR spectrum of compound (**3g**)

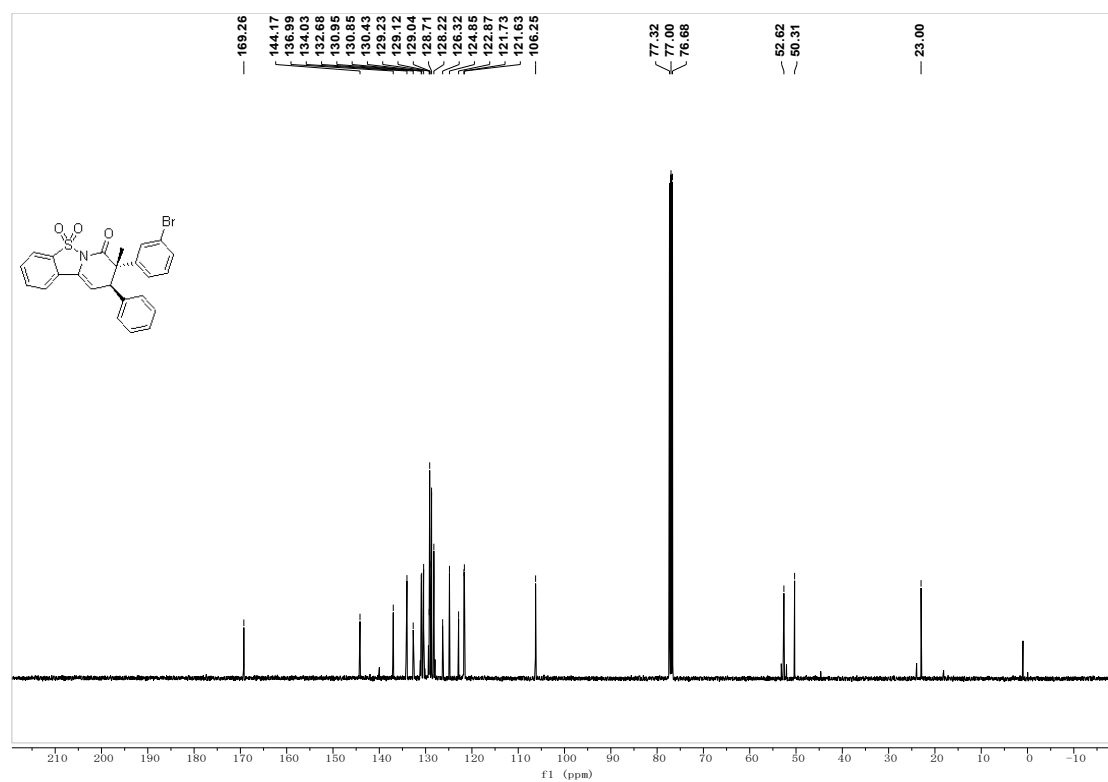

$^1\text{H}$  NMR spectrum of compound (**3h**)

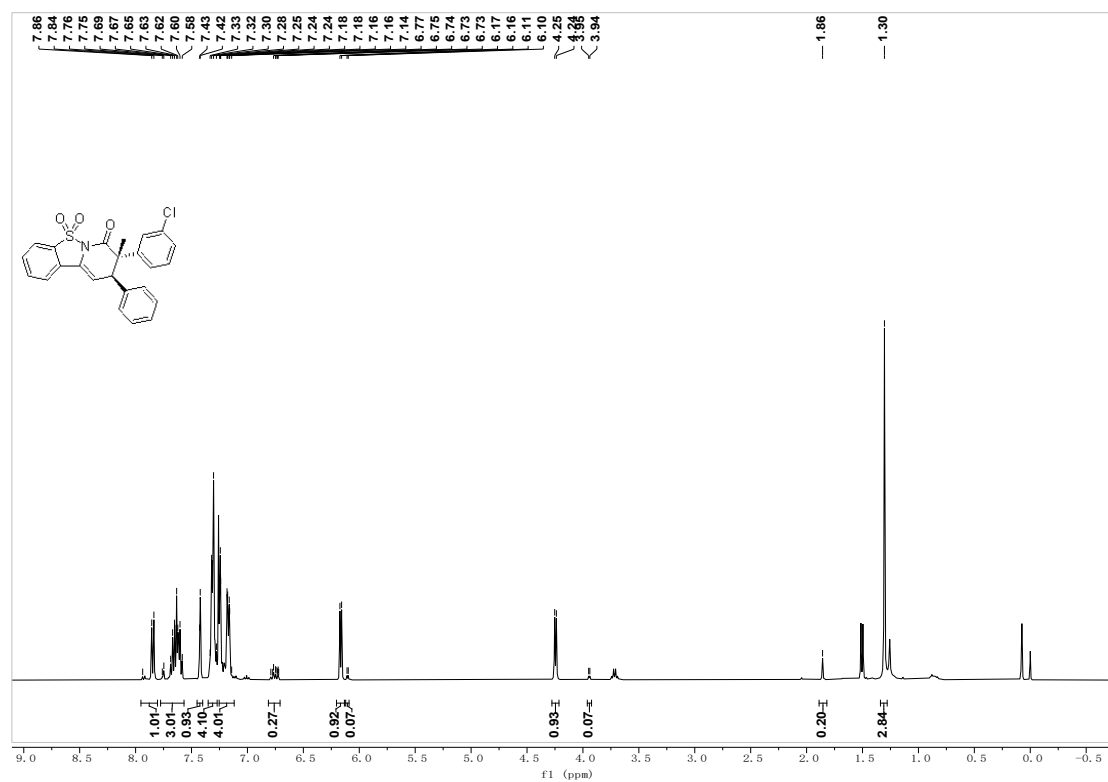

$^{13}\text{C}$  NMR spectrum of compound (**3h**)

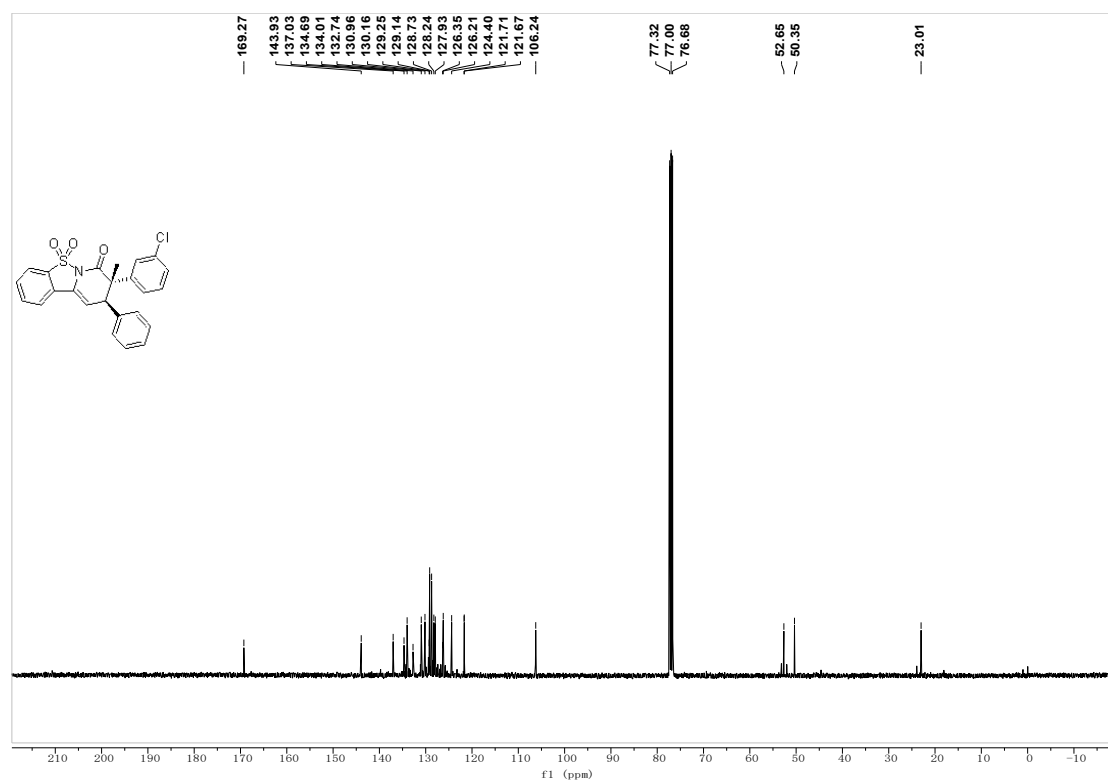

$^1\text{H}$  NMR spectrum of compound (**3i**)

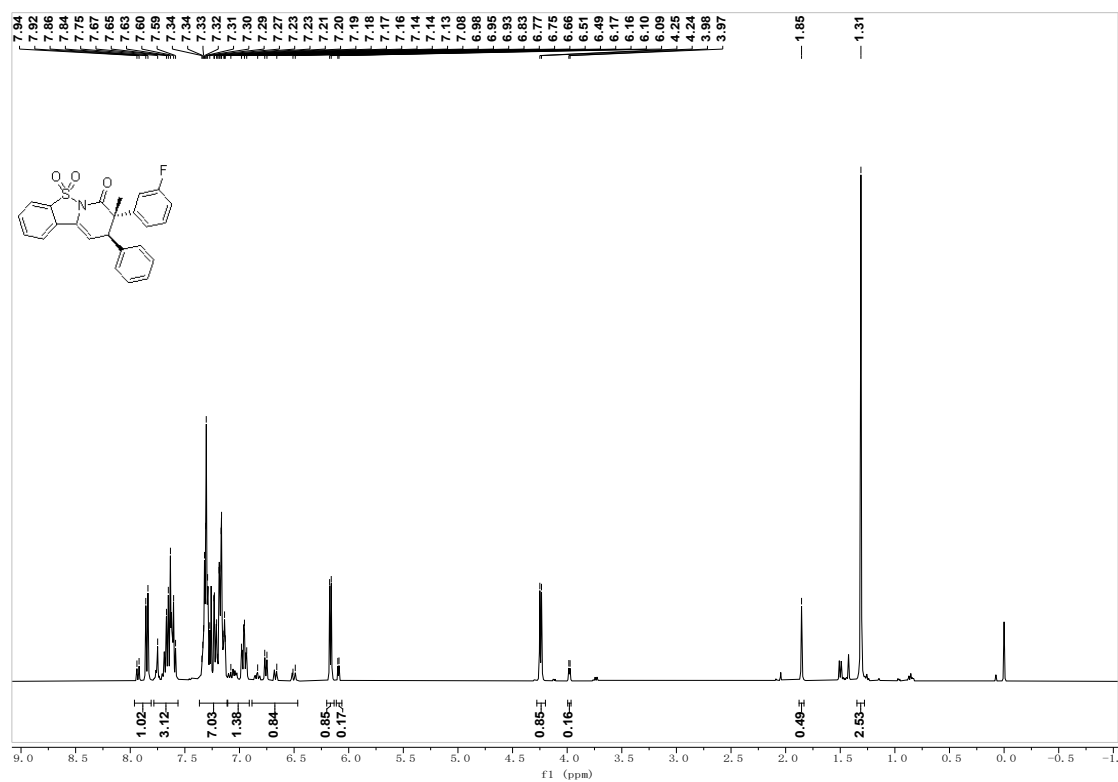

<sup>13</sup>C NMR spectrum of compound (3i)

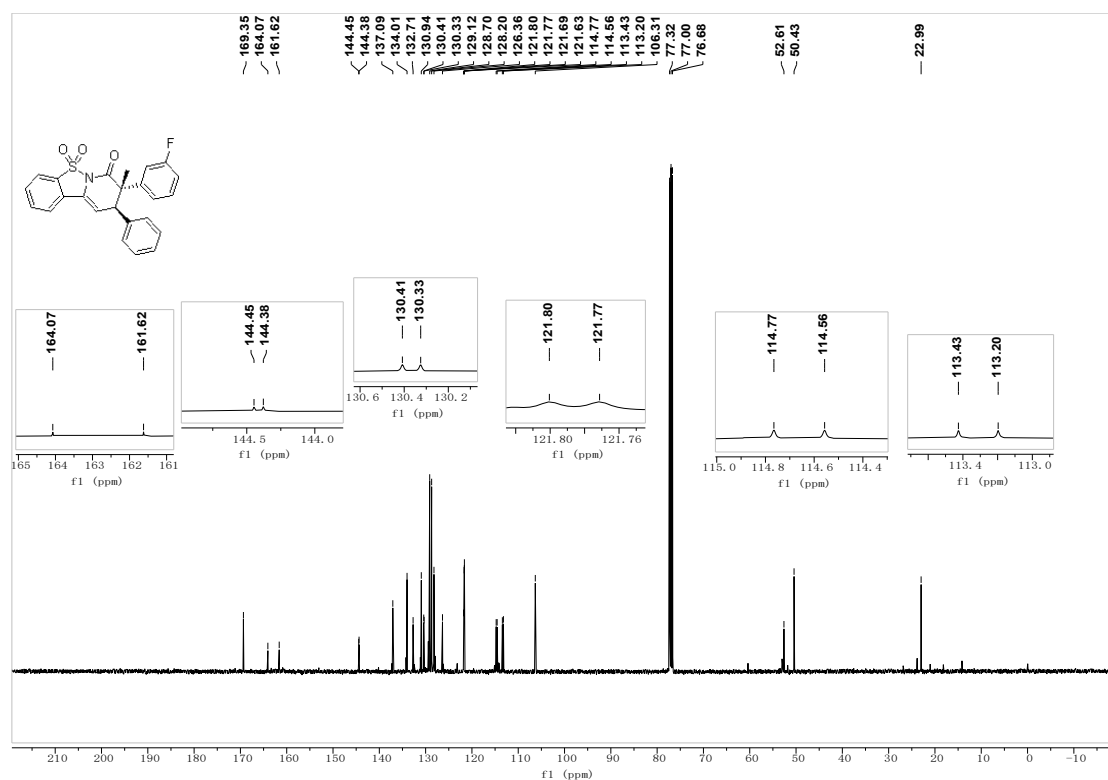

<sup>19</sup>F NMR spectrum of compound (3i)

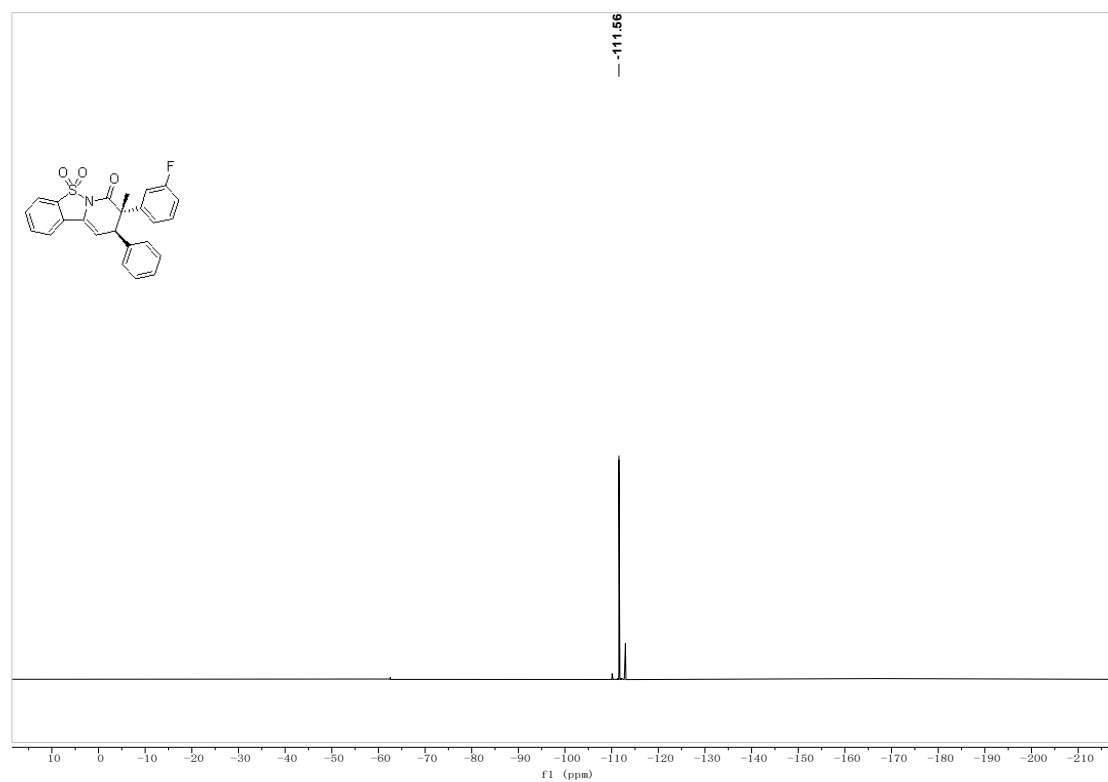

<sup>1</sup>H NMR spectrum of compound (3j)

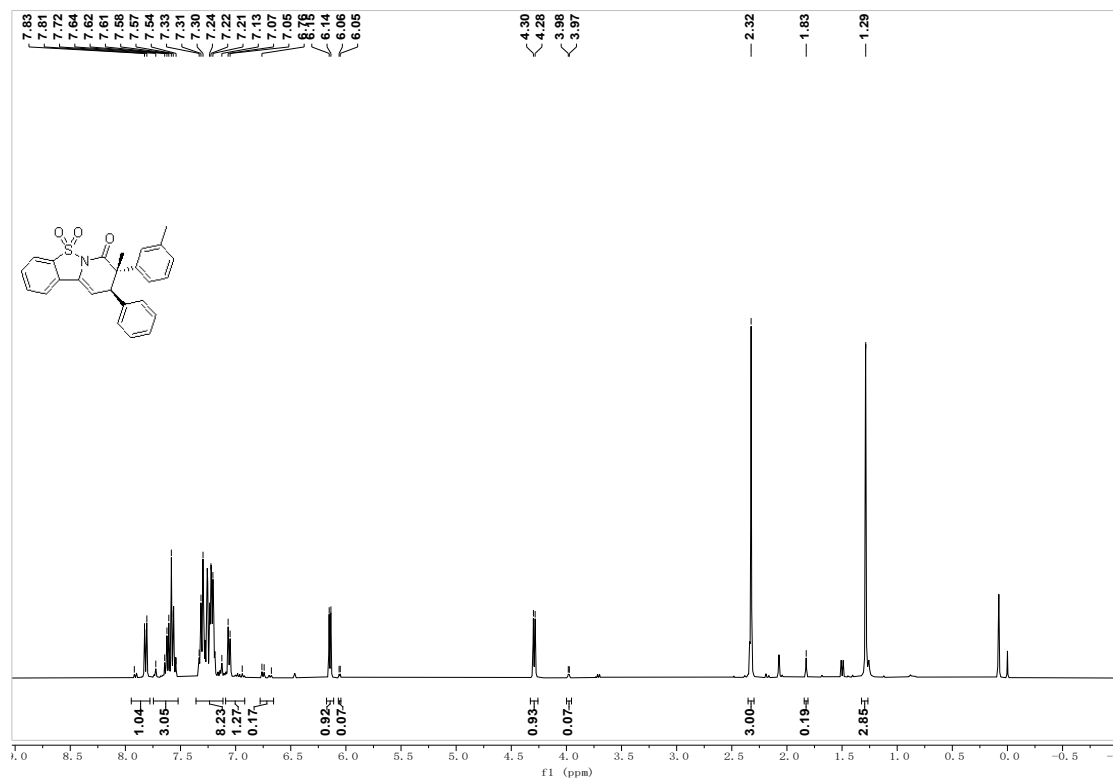

<sup>13</sup>C NMR spectrum of compound (3j)

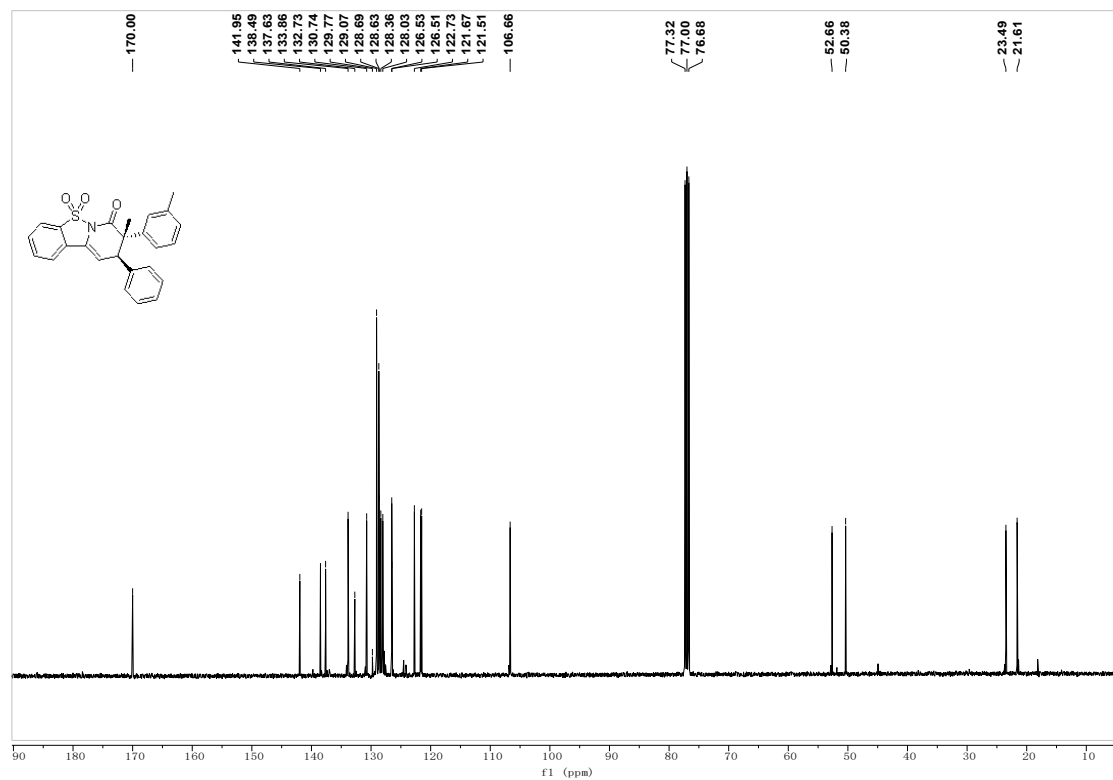

<sup>1</sup>H NMR spectrum of compound (3k)

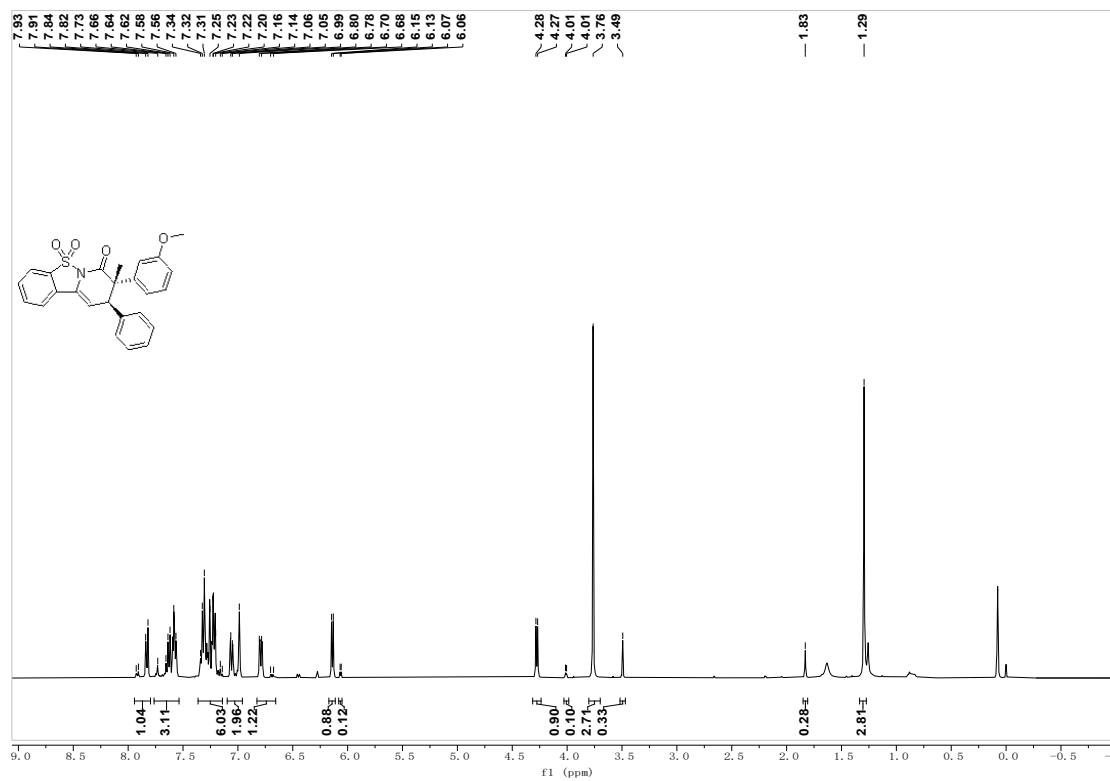

<sup>13</sup>C NMR spectrum of compound (3k)

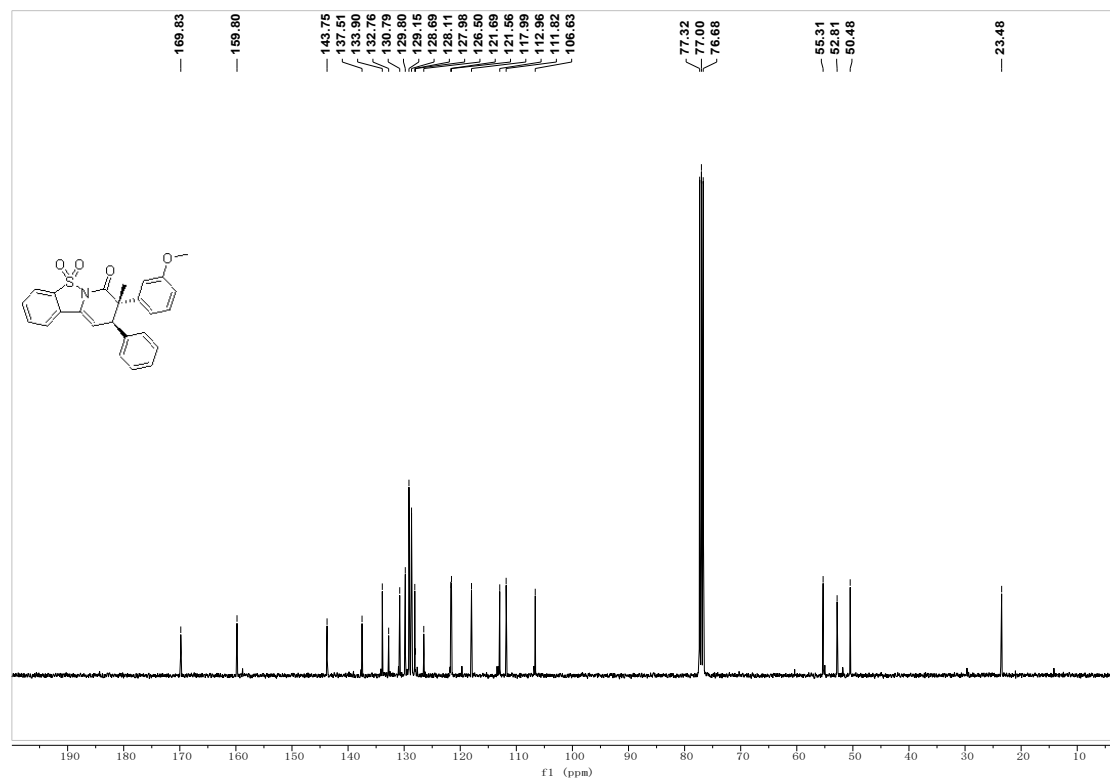

<sup>1</sup>H NMR spectrum of compound (31)

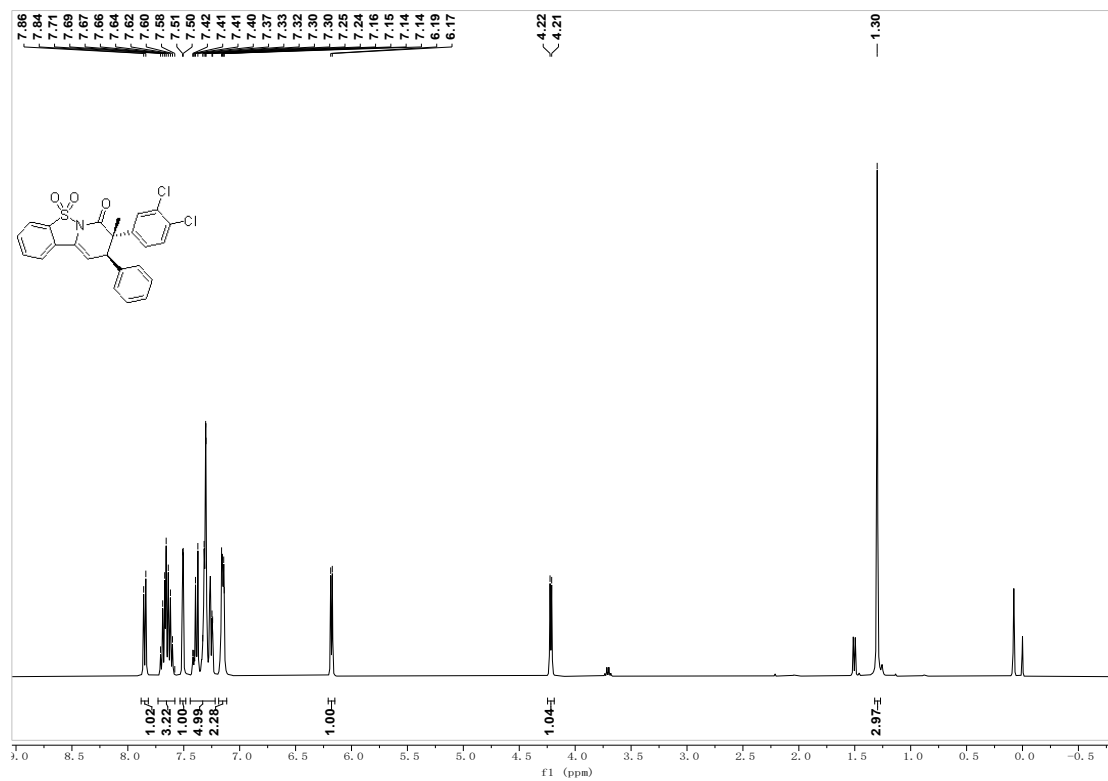

<sup>13</sup>C NMR spectrum of compound (31)

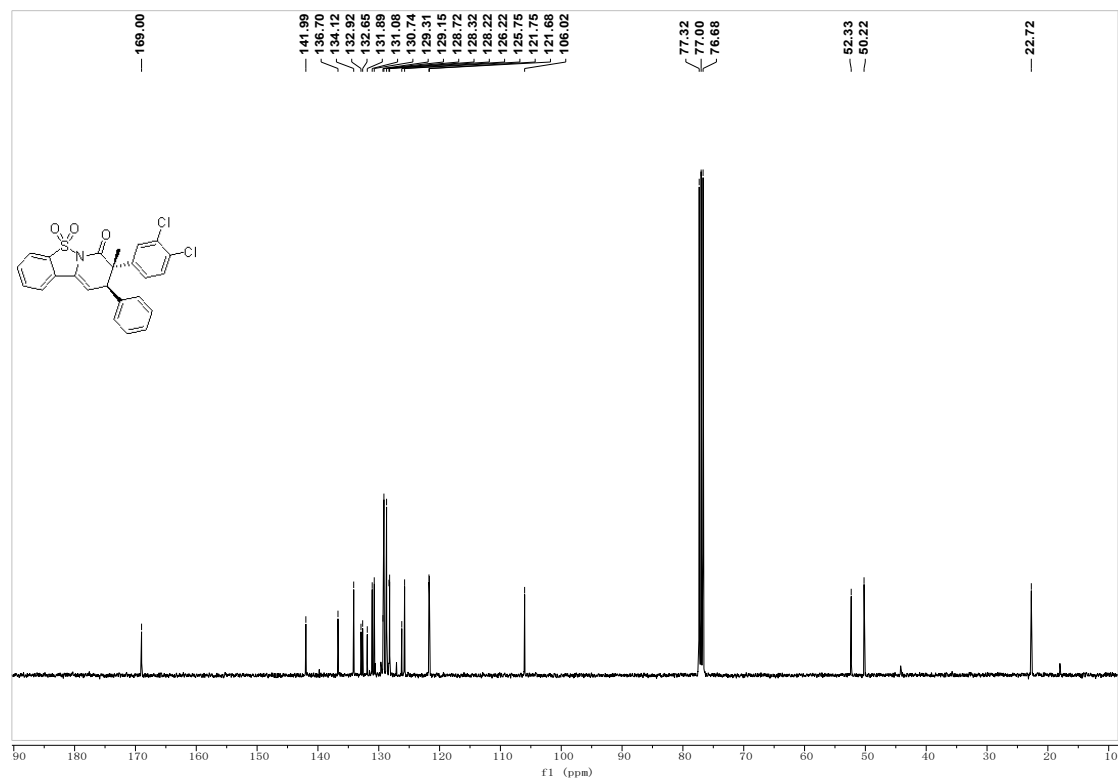



<sup>1</sup>H NMR spectrum of compound (3m)

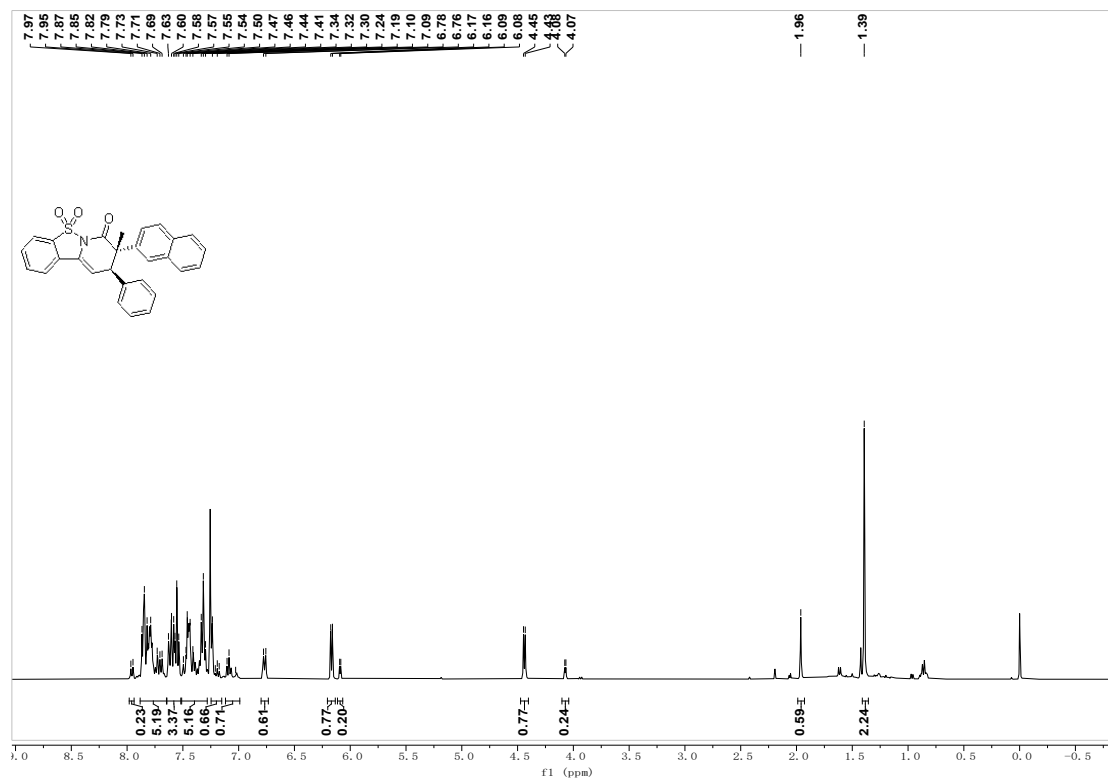

<sup>13</sup>C NMR spectrum of compound (3m)

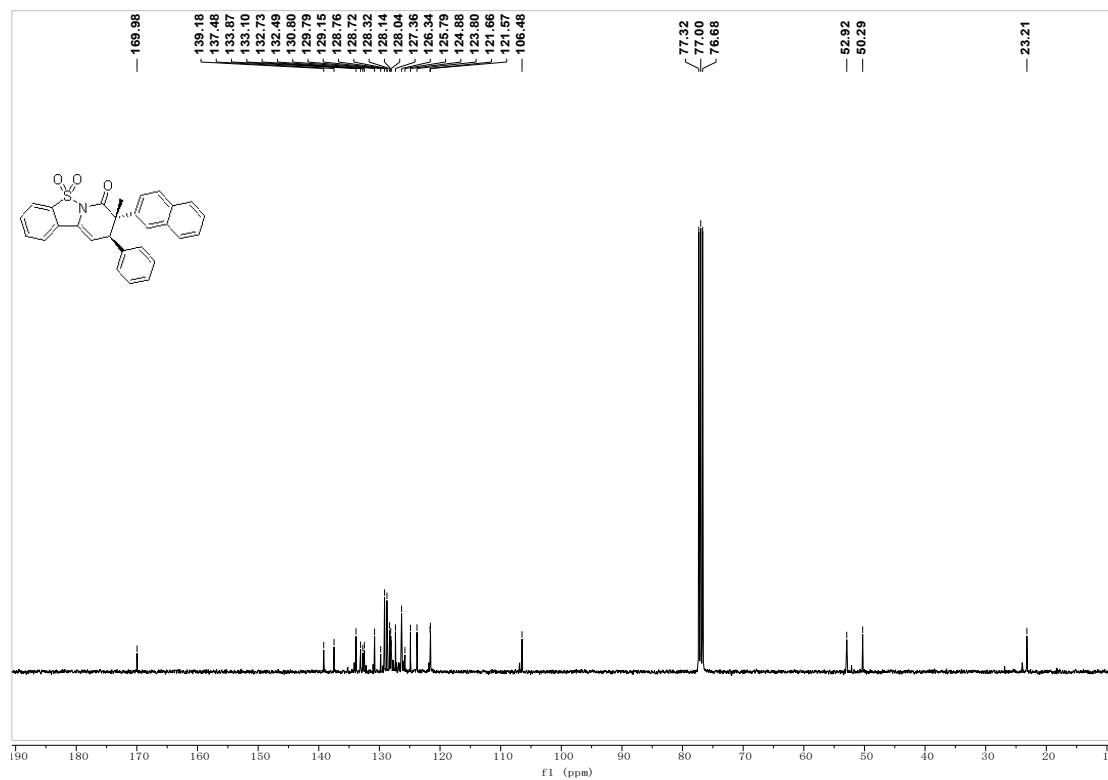

<sup>1</sup>H NMR spectrum of compound (3n)

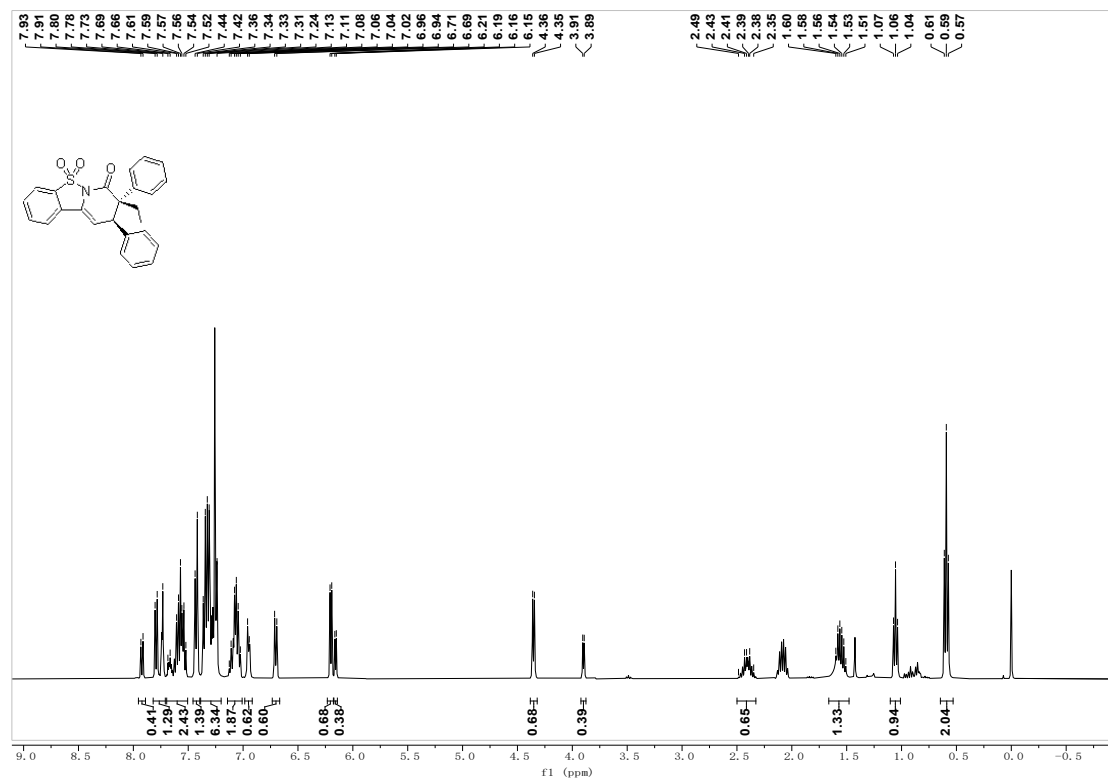

<sup>13</sup>C NMR spectrum of compound (3n)

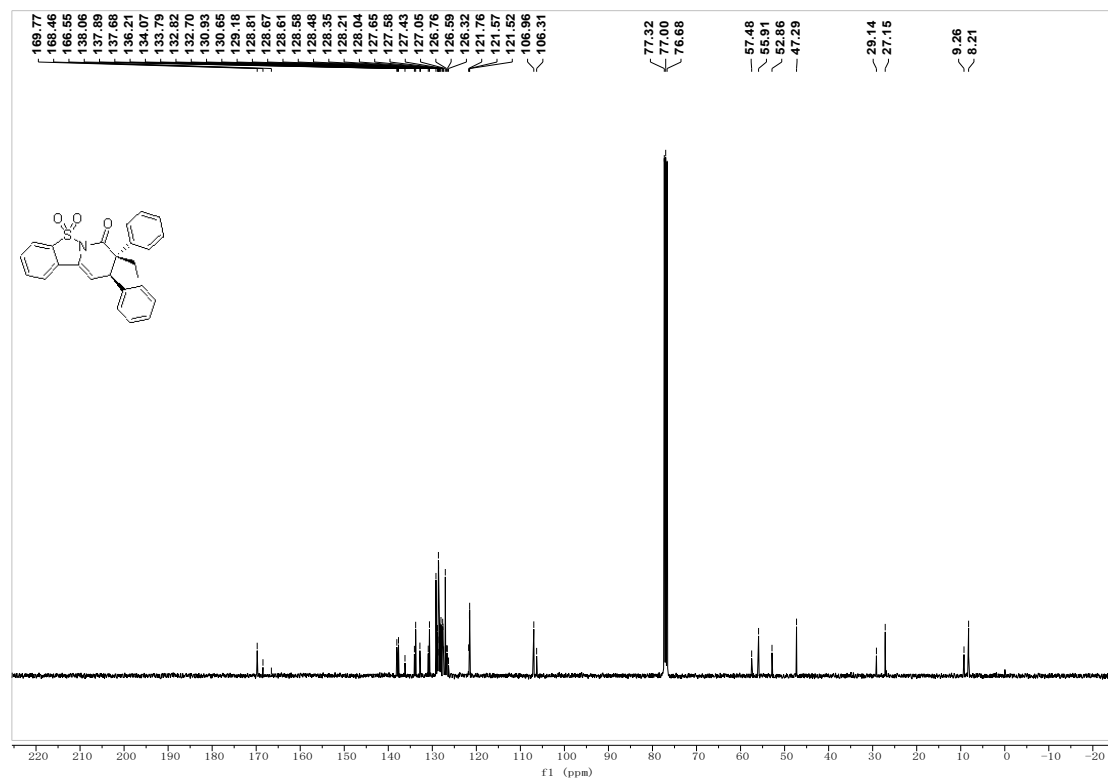

<sup>1</sup>H NMR spectrum of compound (30)

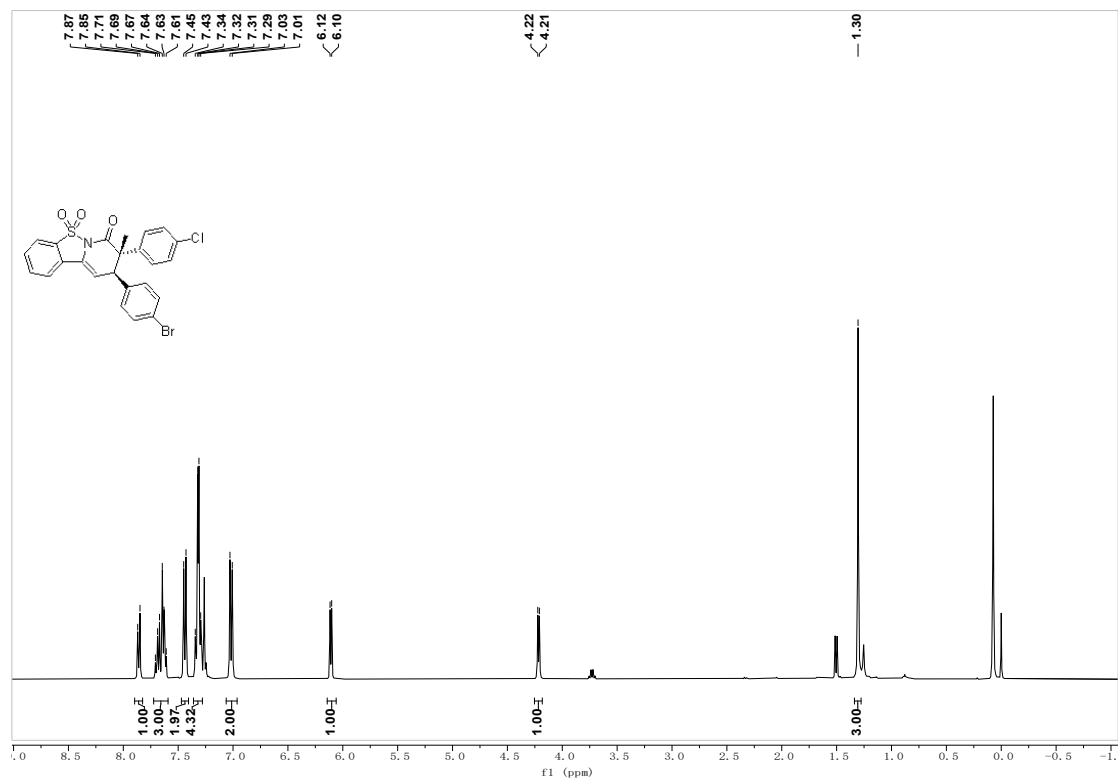

<sup>13</sup>C NMR spectrum of compound (30)

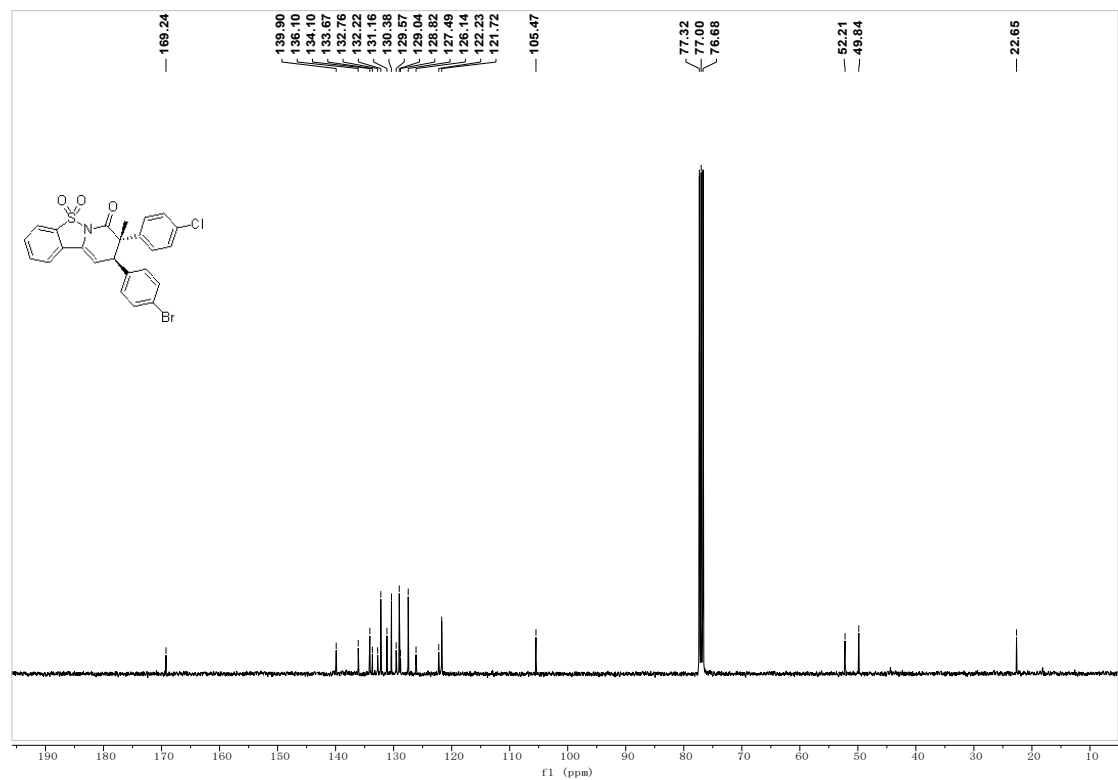

$^1\text{H}$  NMR spectrum of compound (**3p**)

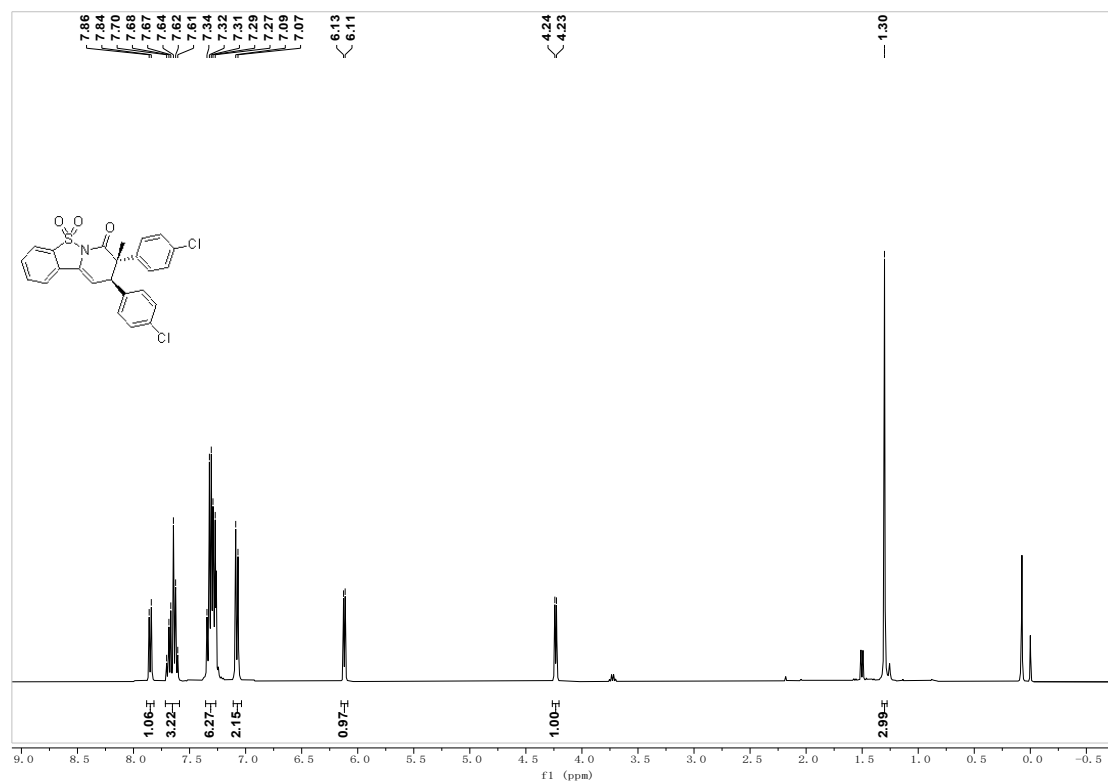

$^{13}\text{C}$  NMR spectrum of compound (**3p**)

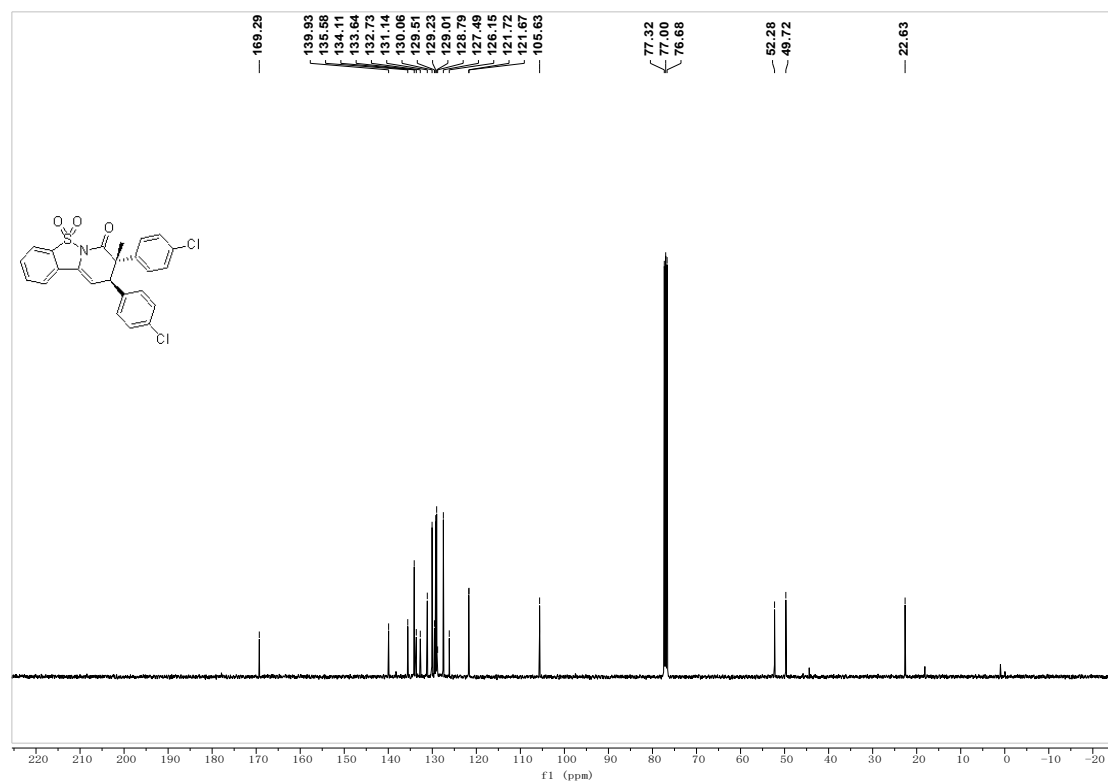

<sup>1</sup>H NMR spectrum of compound (3q)

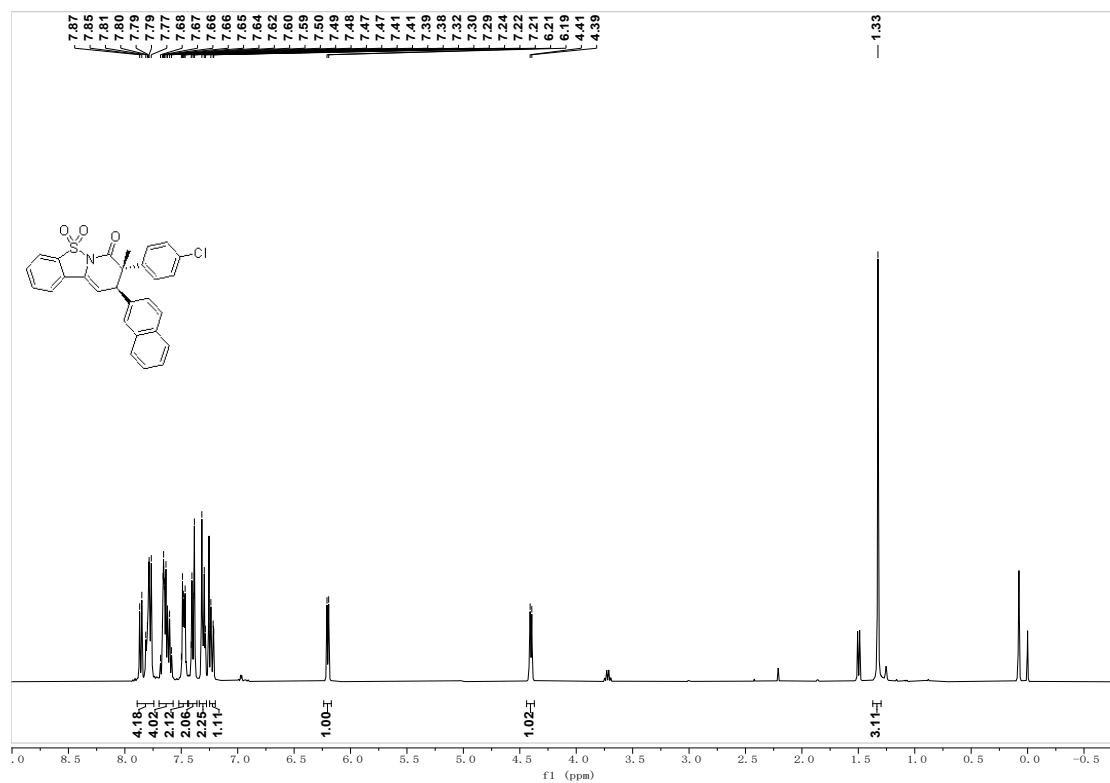

<sup>13</sup>C NMR spectrum of compound (3q)

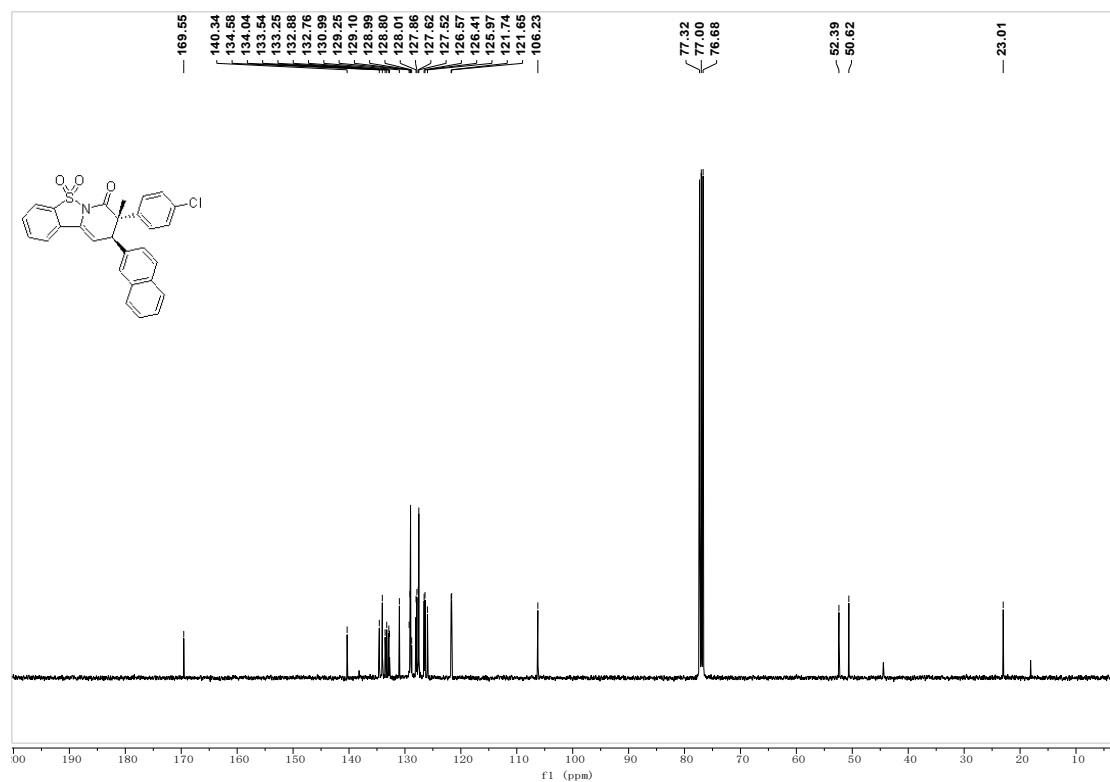

## 6. HPLC Spectra of Compounds 3a–3q

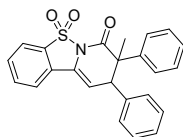

rac 3a

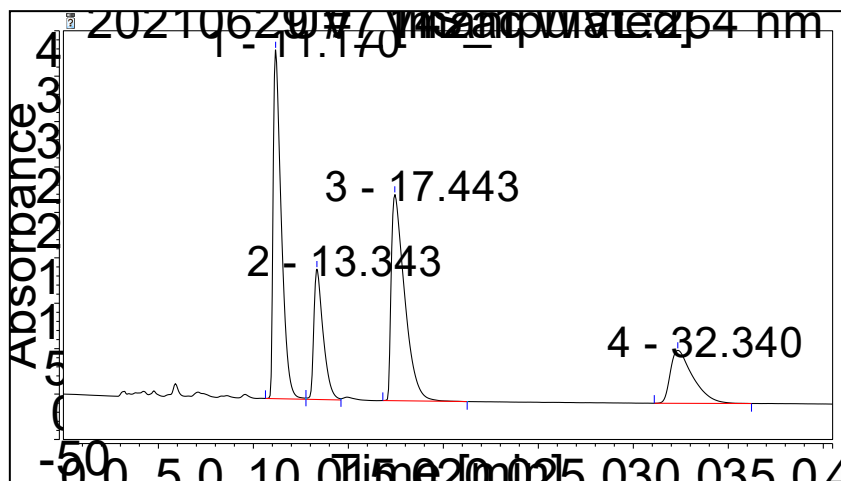

| Integration Results |                       |                 |               |                    |
|---------------------|-----------------------|-----------------|---------------|--------------------|
| Peak Name           | Retention Time<br>min | Area<br>mAU*min | Height<br>mAU | Relative Area<br>% |
| 1                   | 11.170                | 191.525         | 384.034       | 35.54              |
| 2                   | 13.343                | 81.793          | 143.519       | 15.18              |
| 3                   | 17.443                | 185.704         | 227.094       | 34.46              |
| 4                   | 32.340                | 79.930          | 58.289        | 14.83              |

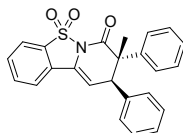

3a

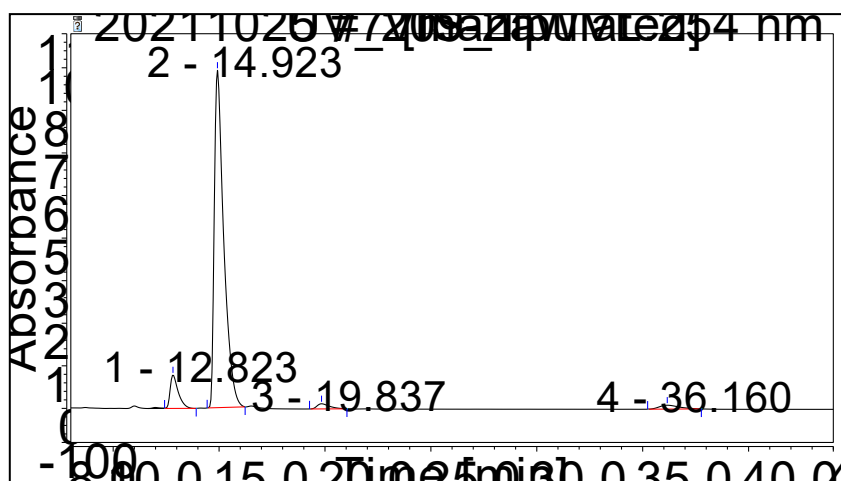

| Integration Results |                       |                 |               |                    |
|---------------------|-----------------------|-----------------|---------------|--------------------|
| Peak Name           | Retention Time<br>min | Area<br>mAU*min | Height<br>mAU | Relative Area<br>% |
| 1                   | 12.823                | 43.213          | 98.506        | 7.44               |
| 2                   | 14.923                | 514.830         | 990.457       | 88.64              |
| 3                   | 19.837                | 10.348          | 15.108        | 1.78               |
| 4                   | 36.160                | 12.417          | 11.354        | 2.14               |

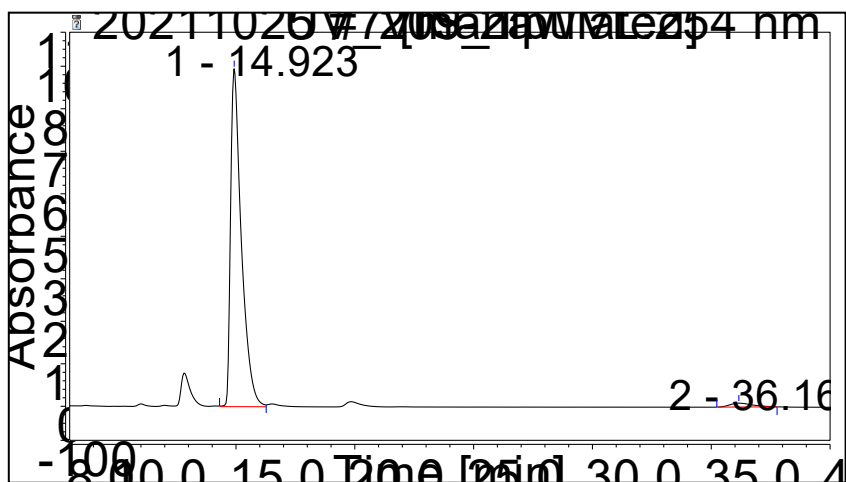

| Integration Results |                       |                 |               |                    |
|---------------------|-----------------------|-----------------|---------------|--------------------|
| Peak Name           | Retention Time<br>min | Area<br>mAU*min | Height<br>mAU | Relative Area<br>% |
| 1                   | 14.923                | 522.430         | 993.631       | 97.68              |
| 2                   | 36.160                | 12.417          | 11.354        | 2.32               |

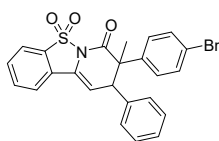

rac 3b

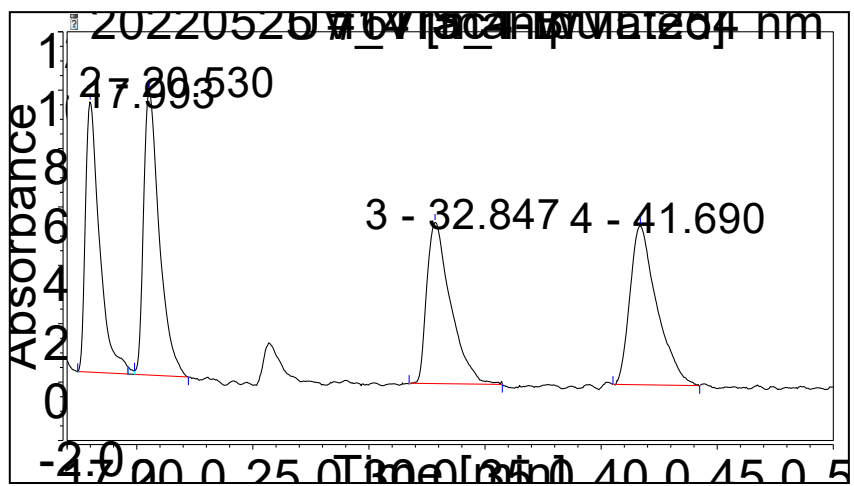

| Integration Results |                       |                 |               |                    |
|---------------------|-----------------------|-----------------|---------------|--------------------|
| Peak Name           | Retention Time<br>min | Area<br>mAU*min | Height<br>mAU | Relative Area<br>% |
| 1                   | 17.993                | 6.557           | 9.264         | 23.38              |
| 2                   | 20.530                | 7.646           | 9.758         | 27.26              |
| 3                   | 32.847                | 6.548           | 5.529         | 23.34              |
| 4                   | 41.690                | 7.301           | 5.444         | 26.03              |

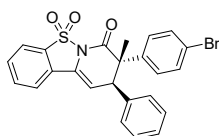

3b

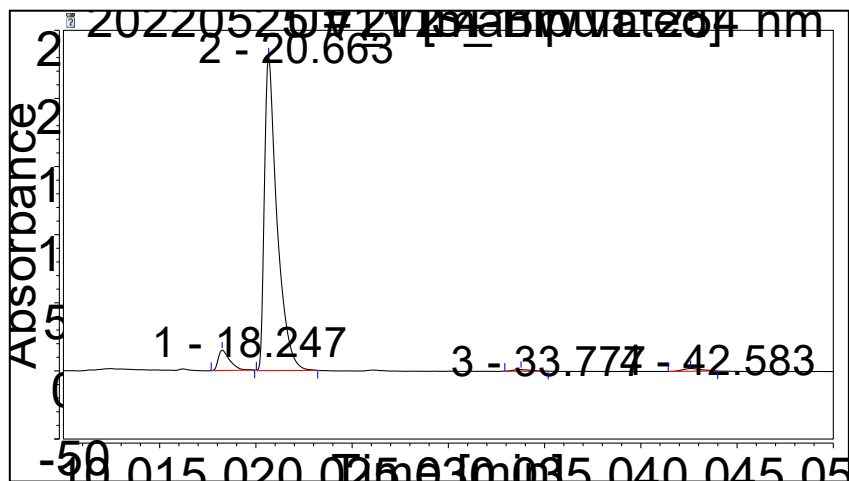

| Integration Results |                       |                 |               |                    |
|---------------------|-----------------------|-----------------|---------------|--------------------|
| Peak Name           | Retention Time<br>min | Area<br>mAU*min | Height<br>mAU | Relative Area<br>% |
| 1                   | 18.247                | 10.350          | 14.944        | 5.47               |
| 2                   | 20.663                | 175.374         | 230.960       | 92.63              |
| 3                   | 33.777                | 1.292           | 1.231         | 0.68               |
| 4                   | 42.583                | 2.321           | 2.035         | 1.23               |

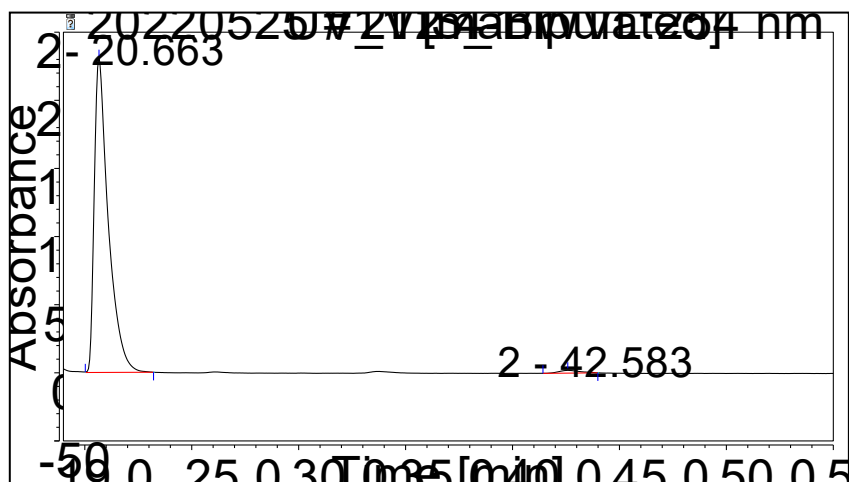

| Integration Results |                       |                 |               |                    |
|---------------------|-----------------------|-----------------|---------------|--------------------|
| Peak Name           | Retention Time<br>min | Area<br>mAU*min | Height<br>mAU | Relative Area<br>% |
| 1                   | 20.663                | 175.374         | 230.960       | 98.69              |
| 2                   | 42.583                | 2.321           | 2.035         | 1.31               |



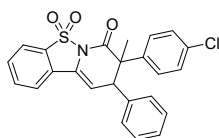

rac 3c

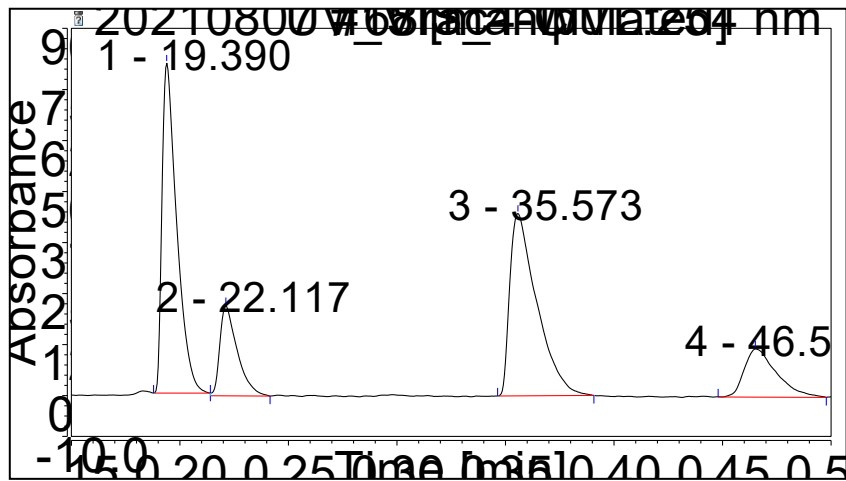

| Integration Results |                       |                 |               |                    |
|---------------------|-----------------------|-----------------|---------------|--------------------|
| Peak Name           | Retention Time<br>min | Area<br>mAU*min | Height<br>mAU | Relative Area<br>% |
| 1                   | 19.390                | 63.808          | 80.873        | 37.73              |
| 2                   | 22.117                | 20.515          | 22.097        | 12.13              |
| 3                   | 35.573                | 64.403          | 44.718        | 38.08              |
| 4                   | 46.510                | 20.391          | 11.816        | 12.06              |

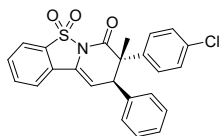

3c

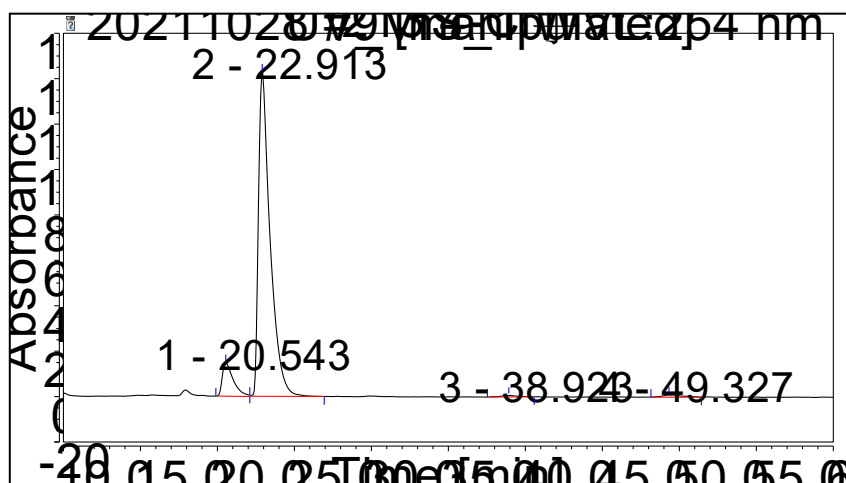

| Integration Results |                       |                 |               |                    |
|---------------------|-----------------------|-----------------|---------------|--------------------|
| Peak Name           | Retention Time<br>min | Area<br>mAU*min | Height<br>mAU | Relative Area<br>% |
| 1                   | 20.543                | 12.156          | 14.760        | 8.71               |
| 2                   | 22.913                | 125.212         | 142.766       | 89.68              |
| 3                   | 38.923                | 0.761           | 0.635         | 0.54               |
| 4                   | 49.327                | 1.497           | 0.927         | 1.07               |

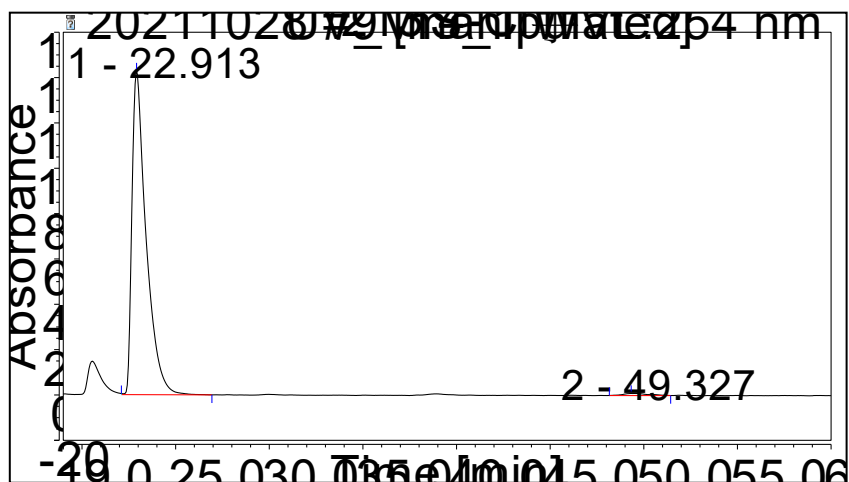

| Integration Results |                       |                 |               |                    |
|---------------------|-----------------------|-----------------|---------------|--------------------|
| Peak Name           | Retention Time<br>min | Area<br>mAU*min | Height<br>mAU | Relative Area<br>% |
| 1                   | 22.913                | 125.212         | 142.766       | 98.82              |
| 2                   | 49.327                | 1.497           | 0.927         | 1.18               |

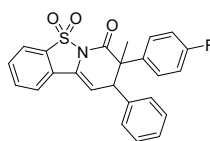

rac 3d

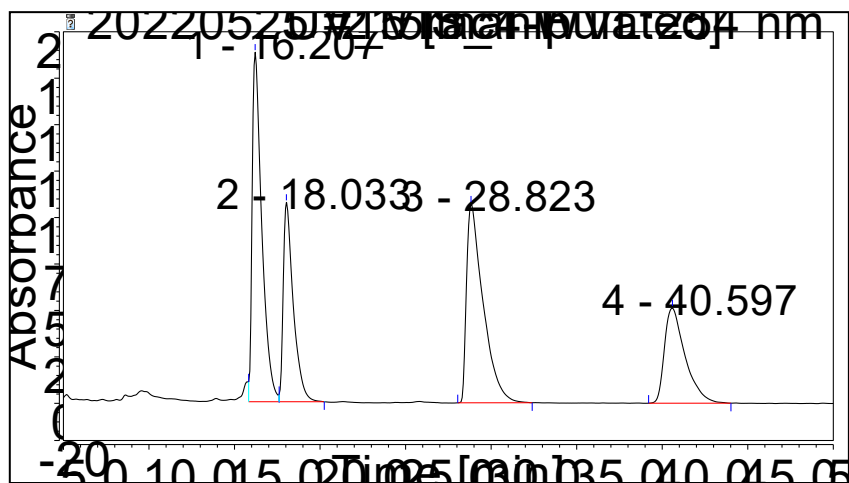

| Integration Results |                       |                 |               |                    |
|---------------------|-----------------------|-----------------|---------------|--------------------|
| Peak Name           | Retention Time<br>min | Area<br>mAU*min | Height<br>mAU | Relative Area<br>% |
| 1                   | 16.207                | 123.179         | 188.131       | 31.73              |
| 2                   | 18.033                | 73.187          | 107.301       | 18.85              |
| 3                   | 28.823                | 120.255         | 106.963       | 30.97              |
| 4                   | 40.597                | 71.631          | 51.253        | 18.45              |

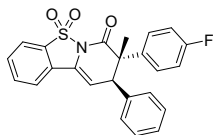

3d

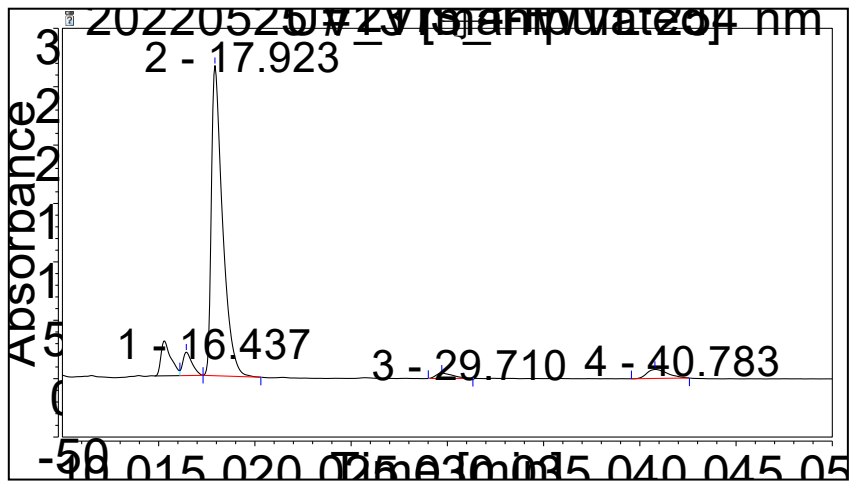

| Integration Results |                       |                 |               |                    |
|---------------------|-----------------------|-----------------|---------------|--------------------|
| Peak Name           | Retention Time<br>min | Area<br>mAU*min | Height<br>mAU | Relative Area<br>% |
| 1                   | 16.437                | 11.200          | 20.112        | 5.46               |
| 2                   | 17.923                | 179.795         | 265.584       | 87.59              |
| 3                   | 29.710                | 4.663           | 4.563         | 2.27               |
| 4                   | 40.783                | 9.612           | 7.749         | 4.68               |

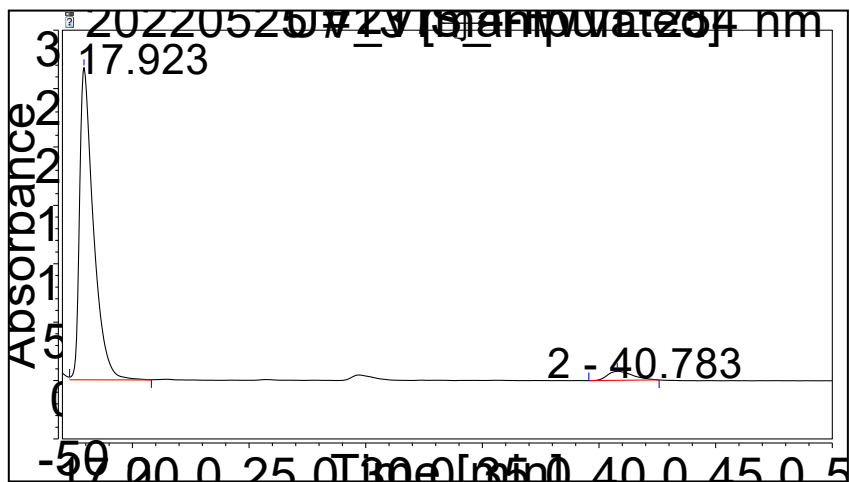

| Integration Results |                       |                 |               |                    |
|---------------------|-----------------------|-----------------|---------------|--------------------|
| Peak Name           | Retention Time<br>min | Area<br>mAU*min | Height<br>mAU | Relative Area<br>% |
| 1                   | 17.923                | 184.379         | 267.472       | 95.04              |
| 2                   | 40.783                | 9.612           | 7.749         | 4.96               |

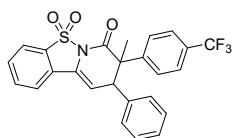

rac 3e

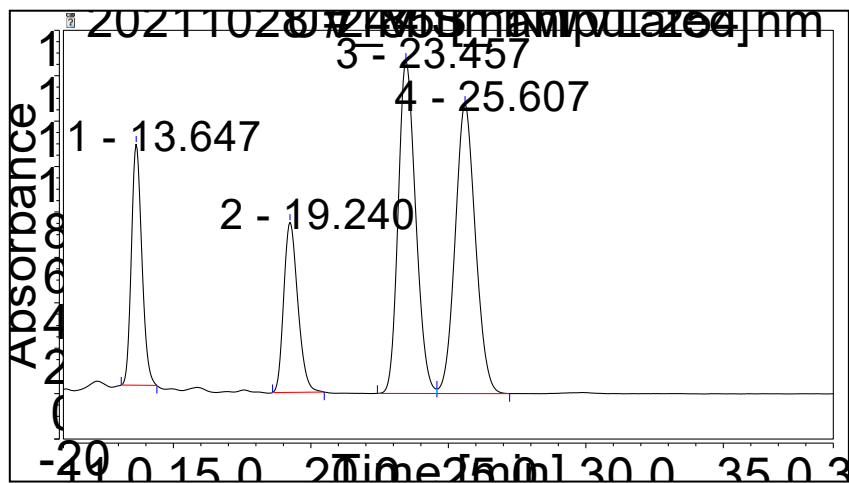

| Peak Name | Retention Time (min) | Area (mAU*min) | Height (mAU) | Relative Area (%) |
|-----------|----------------------|----------------|--------------|-------------------|
| 1         | 13.647               | 46.799         | 106.190      | 15.20             |
| 2         | 19.240               | 44.431         | 74.895       | 14.43             |
| 3         | 23.457               | 107.958        | 146.328      | 35.06             |
| 4         | 25.607               | 108.711        | 127.394      | 35.31             |

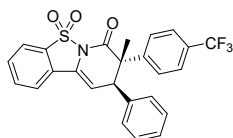

3e

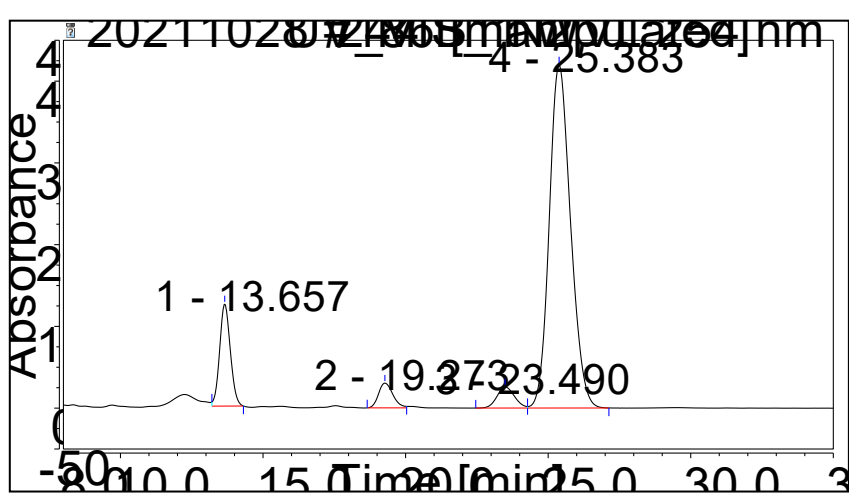

| Peak Name | Retention Time (min) | Area (mAU*min) | Height (mAU) | Relative Area (%) |
|-----------|----------------------|----------------|--------------|-------------------|
| 1         | 13.657               | 54.290         | 125.117      | 11.95             |
| 2         | 19.273               | 17.680         | 30.292       | 3.89              |
| 3         | 23.490               | 18.374         | 25.861       | 4.04              |
| 4         | 25.383               | 364.008        | 419.816      | 80.12             |

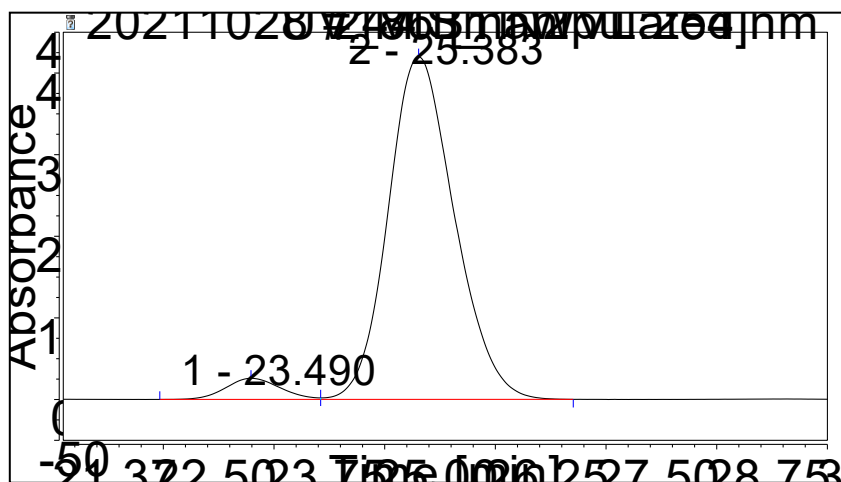

| Integration Results |                       |                 |               |                    |
|---------------------|-----------------------|-----------------|---------------|--------------------|
| Peak Name           | Retention Time<br>min | Area<br>mAU*min | Height<br>mAU | Relative Area<br>% |
| 1                   | 23.490                | 18.374          | 25.861        | 4.81               |
| 2                   | 25.383                | 364.008         | 419.816       | 95.19              |

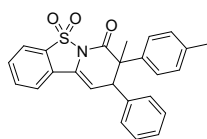

*rac* 3f

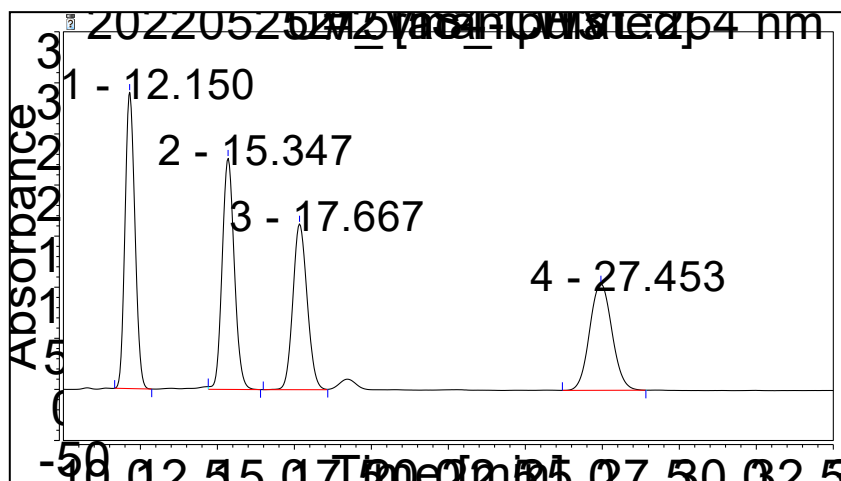

| Integration Results |                       |                 |               |                    |
|---------------------|-----------------------|-----------------|---------------|--------------------|
| Peak Name           | Retention Time<br>min | Area<br>mAU*min | Height<br>mAU | Relative Area<br>% |
| 1                   | 12.150                | 108.082         | 290.035       | 27.98              |
| 2                   | 15.347                | 103.294         | 226.439       | 26.74              |
| 3                   | 17.667                | 87.314          | 162.319       | 22.60              |
| 4                   | 27.453                | 87.609          | 104.219       | 22.68              |

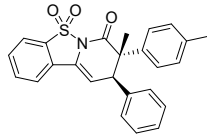

3f

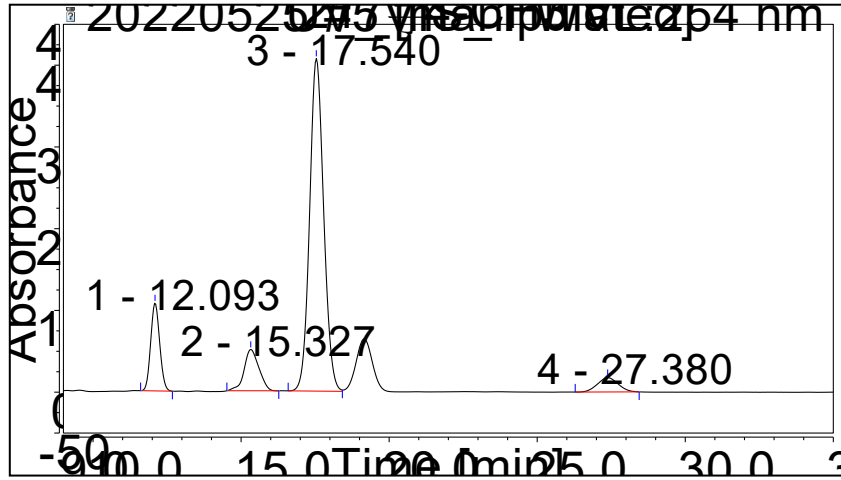

| Integration Results |                       |                 |               |                    |
|---------------------|-----------------------|-----------------|---------------|--------------------|
| Peak Name           | Retention Time<br>min | Area<br>mAU*min | Height<br>mAU | Relative Area<br>% |
| 1                   | 12.093                | 37.861          | 107.617       | 12.41              |
| 2                   | 15.327                | 29.165          | 50.540        | 9.56               |
| 3                   | 17.540                | 223.815         | 407.029       | 73.39              |
| 4                   | 27.380                | 14.124          | 17.605        | 4.63               |

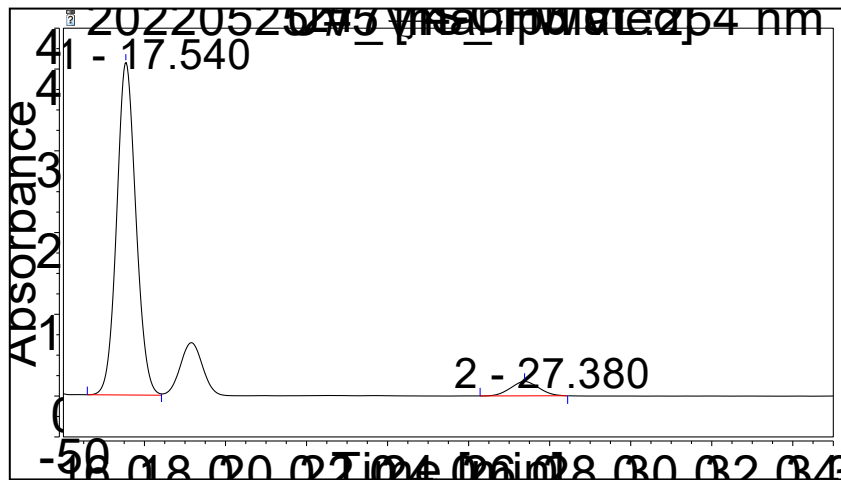

| Integration Results |                       |                 |               |                    |
|---------------------|-----------------------|-----------------|---------------|--------------------|
| Peak Name           | Retention Time<br>min | Area<br>mAU*min | Height<br>mAU | Relative Area<br>% |
| 1                   | 17.540                | 223.815         | 407.029       | 94.06              |
| 2                   | 27.380                | 14.124          | 17.605        | 5.94               |

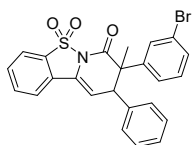

rac 3g

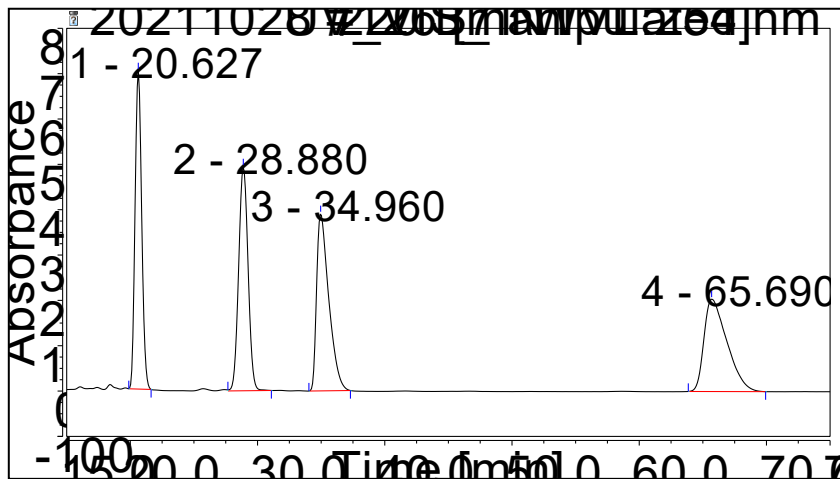

| Integration Results |                       |                 |               |                    |
|---------------------|-----------------------|-----------------|---------------|--------------------|
| Peak Name           | Retention Time<br>min | Area<br>mAU*min | Height<br>mAU | Relative Area<br>% |
| 1                   | 20.627                | 423.382         | 701.828       | 24.85              |
| 2                   | 28.880                | 422.952         | 493.822       | 24.82              |
| 3                   | 34.960                | 432.226         | 390.654       | 25.37              |
| 4                   | 65.690                | 425.446         | 203.750       | 24.97              |

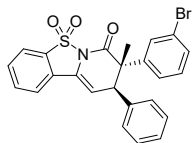

3g

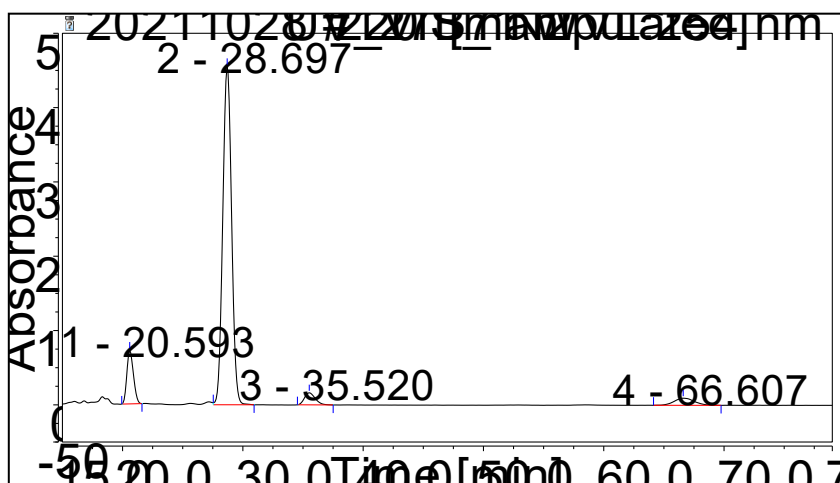

| Integration Results |                       |                 |               |                    |
|---------------------|-----------------------|-----------------|---------------|--------------------|
| Peak Name           | Retention Time<br>min | Area<br>mAU*min | Height<br>mAU | Relative Area<br>% |
| 1                   | 20.593                | 45.305          | 72.296        | 9.69               |
| 2                   | 28.697                | 386.920         | 455.160       | 82.72              |
| 3                   | 35.520                | 16.783          | 16.228        | 3.59               |
| 4                   | 66.607                | 18.713          | 9.575         | 4.00               |

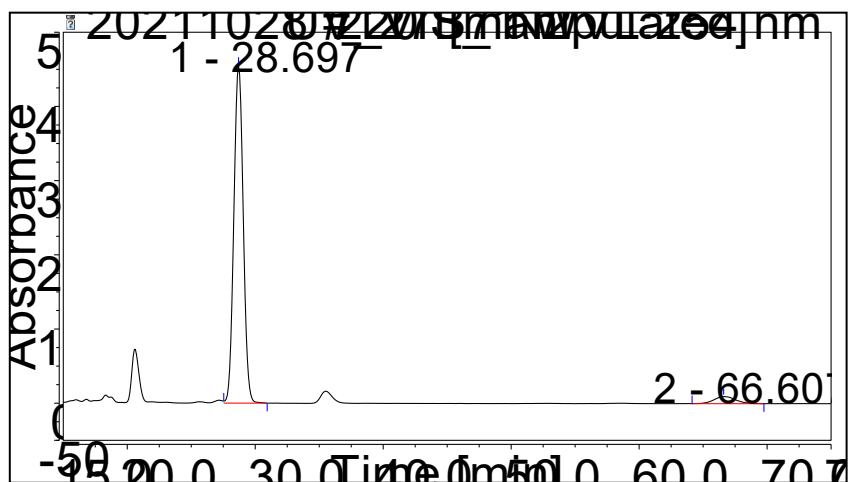

| Integration Results |                       |                 |               |                    |
|---------------------|-----------------------|-----------------|---------------|--------------------|
| Peak Name           | Retention Time<br>min | Area<br>mAU*min | Height<br>mAU | Relative Area<br>% |
| 1                   | 28.697                | 386.920         | 455.160       | 95.39              |
| 2                   | 66.607                | 18.713          | 9.575         | 4.61               |

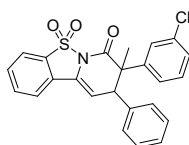

rac 3h

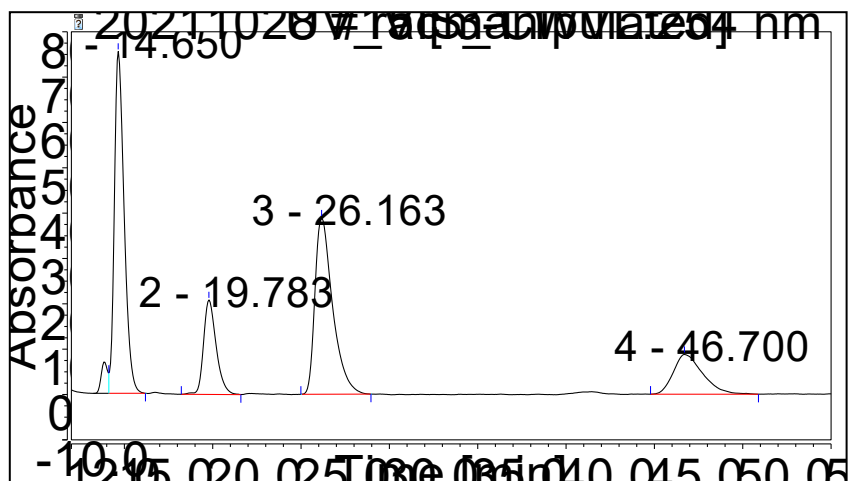

| Integration Results |                       |                 |               |                    |
|---------------------|-----------------------|-----------------|---------------|--------------------|
| Peak Name           | Retention Time<br>min | Area<br>mAU*min | Height<br>mAU | Relative Area<br>% |
| 1                   | 14.650                | 48.469          | 75.403        | 37.95              |
| 2                   | 19.783                | 17.258          | 20.854        | 13.51              |
| 3                   | 26.163                | 45.042          | 38.861        | 35.27              |
| 4                   | 46.700                | 16.944          | 8.765         | 13.27              |



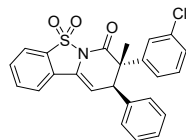

3h

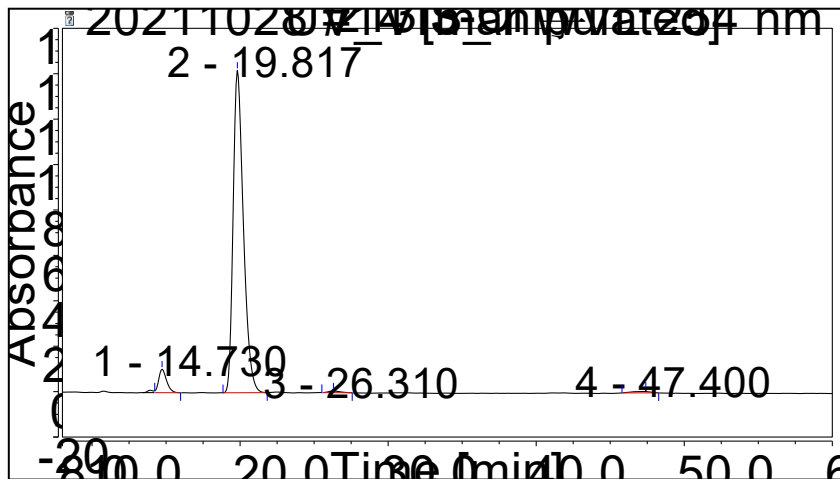

| Integration Results |                       |                 |               |                    |
|---------------------|-----------------------|-----------------|---------------|--------------------|
| Peak Name           | Retention Time<br>min | Area<br>mAU*min | Height<br>mAU | Relative Area<br>% |
| 1                   | 14.730                | 6.309           | 10.346        | 5.17               |
| 2                   | 19.817                | 114.152         | 141.958       | 93.57              |
| 3                   | 26.310                | 0.642           | 0.717         | 0.53               |
| 4                   | 47.400                | 0.893           | 1.187         | 0.73               |

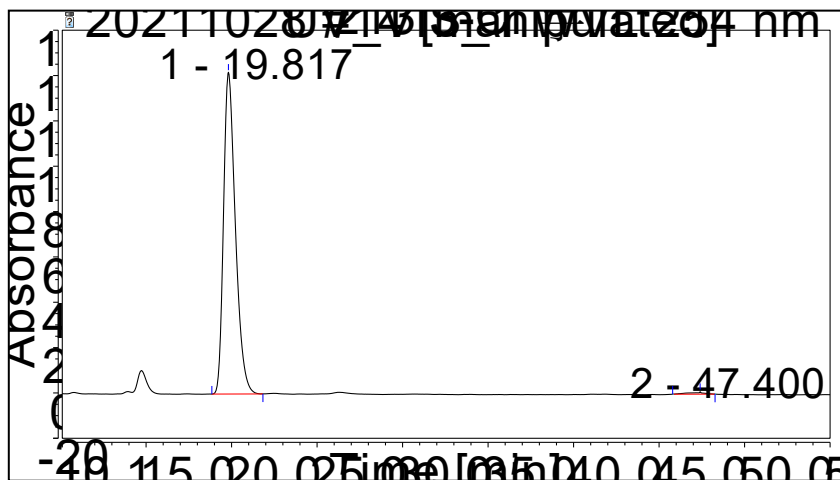

| Integration Results |                       |                 |               |                    |
|---------------------|-----------------------|-----------------|---------------|--------------------|
| Peak Name           | Retention Time<br>min | Area<br>mAU*min | Height<br>mAU | Relative Area<br>% |
| 1                   | 19.817                | 114.152         | 141.958       | 99.22              |
| 2                   | 47.400                | 0.893           | 1.187         | 0.78               |

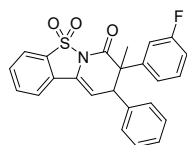

rac 3i

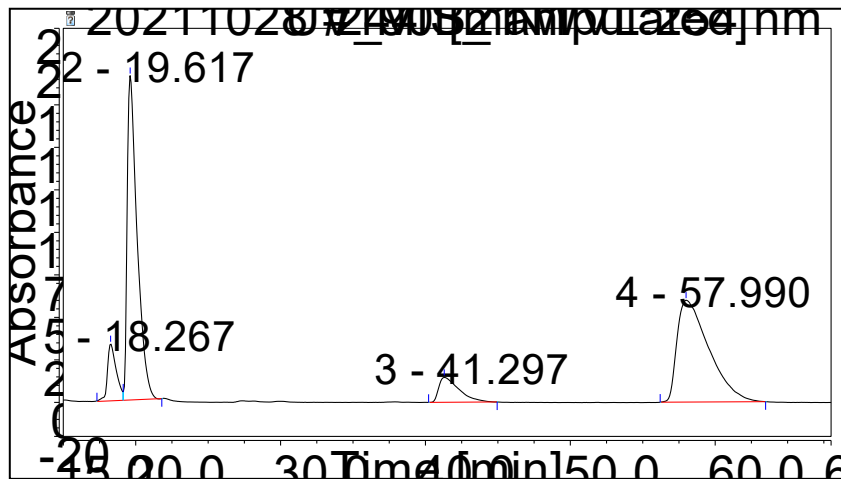

| Integration Results |                      |                |              |                   |
|---------------------|----------------------|----------------|--------------|-------------------|
| Peak Name           | Retention Time (min) | Area (mAU*min) | Height (mAU) | Relative Area (%) |
| 1                   | 18.267               | 23.710         | 33.584       | 6.74              |
| 2                   | 19.617               | 151.894        | 190.769      | 43.19             |
| 3                   | 41.297               | 23.601         | 14.609       | 6.71              |
| 4                   | 57.990               | 152.446        | 59.909       | 43.35             |

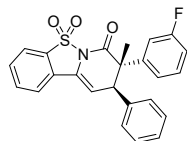

3i

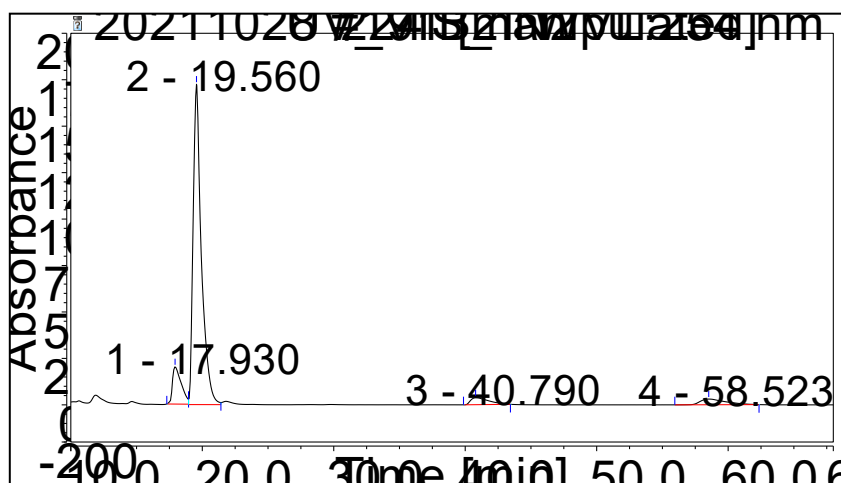

| Integration Results |                      |                |              |                   |
|---------------------|----------------------|----------------|--------------|-------------------|
| Peak Name           | Retention Time (min) | Area (mAU*min) | Height (mAU) | Relative Area (%) |
| 1                   | 17.930               | 156.148        | 200.531      | 10.17             |
| 2                   | 19.560               | 1251.650       | 1724.527     | 81.53             |
| 3                   | 40.790               | 58.880         | 36.918       | 3.84              |
| 4                   | 58.523               | 68.549         | 30.524       | 4.47              |

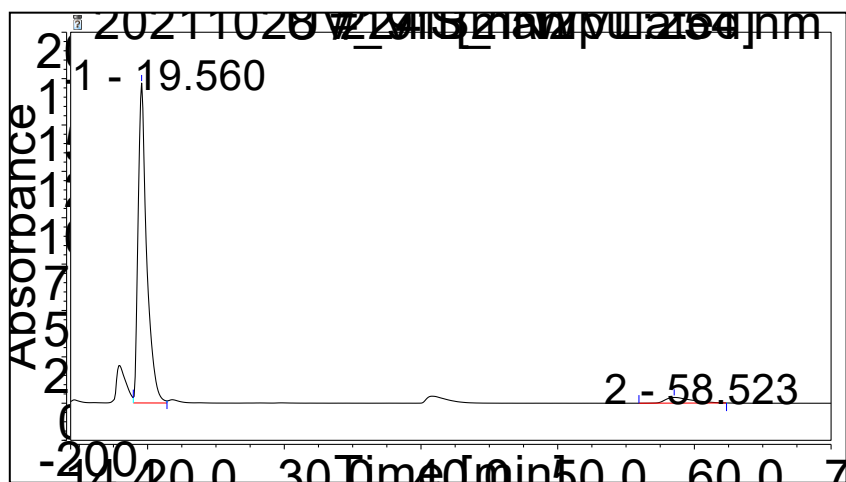

| Integration Results |                    |              |            |                 |
|---------------------|--------------------|--------------|------------|-----------------|
| Peak Name           | Retention Time min | Area mAU*min | Height mAU | Relative Area % |
| 1                   | 19.560             | 1251.650     | 1724.527   | 94.81           |
| 2                   | 58.523             | 68.549       | 30.524     | 5.19            |

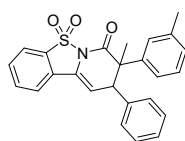

rac 3j

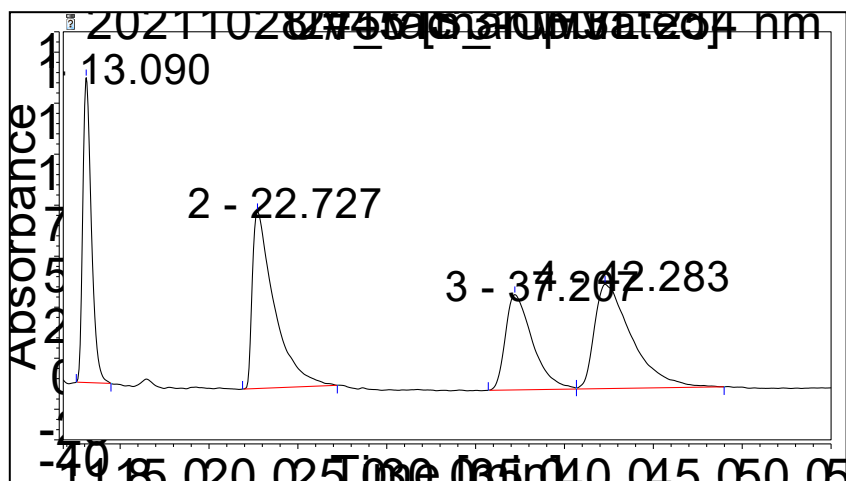

| Integration Results |                    |              |            |                 |
|---------------------|--------------------|--------------|------------|-----------------|
| Peak Name           | Retention Time min | Area mAU*min | Height mAU | Relative Area % |
| 1                   | 13.090             | 84.088       | 149.412    | 20.25           |
| 2                   | 22.727             | 124.544      | 86.727     | 29.99           |
| 3                   | 37.207             | 82.381       | 46.740     | 19.84           |
| 4                   | 42.283             | 124.236      | 51.148     | 29.92           |

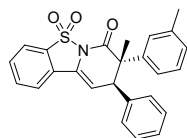

3j

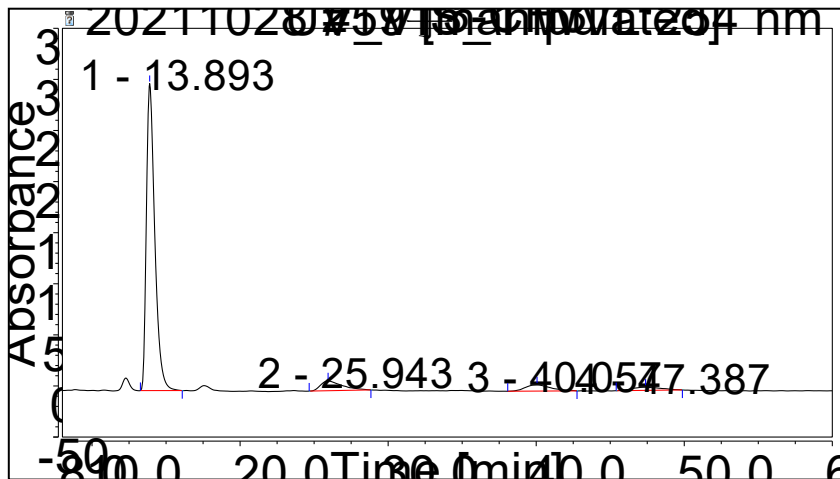

| Integration Results |                       |                 |               |                    |
|---------------------|-----------------------|-----------------|---------------|--------------------|
| Peak Name           | Retention Time<br>min | Area<br>mAU*min | Height<br>mAU | Relative Area<br>% |
| 1                   | 13.893                | 197.706         | 300.436       | 84.94              |
| 2                   | 25.943                | 16.121          | 9.606         | 6.93               |
| 3                   | 40.057                | 11.943          | 5.940         | 5.13               |
| 4                   | 47.387                | 7.002           | 3.048         | 3.01               |

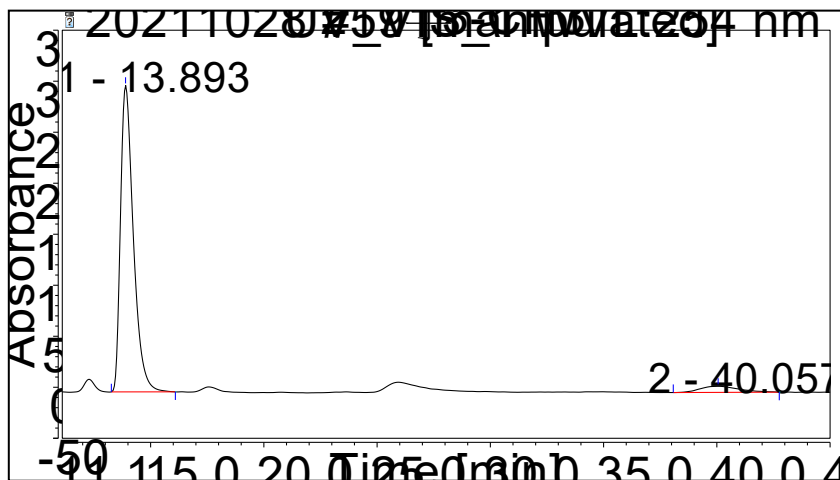

| Integration Results |                       |                 |               |                    |
|---------------------|-----------------------|-----------------|---------------|--------------------|
| Peak Name           | Retention Time<br>min | Area<br>mAU*min | Height<br>mAU | Relative Area<br>% |
| 1                   | 13.893                | 197.706         | 300.436       | 94.30              |
| 2                   | 40.057                | 11.943          | 5.940         | 5.70               |

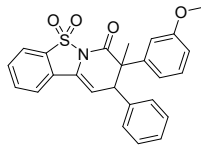

rac 3k

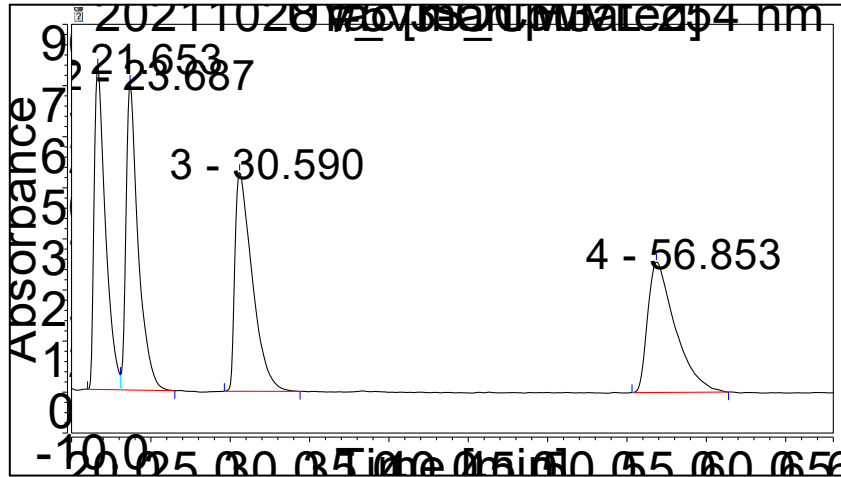

| Integration Results |                       |                 |               |                    |
|---------------------|-----------------------|-----------------|---------------|--------------------|
| Peak Name           | Retention Time<br>min | Area<br>mAU*min | Height<br>mAU | Relative Area<br>% |
| 1                   | 21.653                | 65.526          | 78.942        | 24.77              |
| 2                   | 23.687                | 66.847          | 75.129        | 25.27              |
| 3                   | 30.590                | 67.994          | 53.550        | 25.71              |
| 4                   | 56.853                | 64.127          | 31.927        | 24.25              |

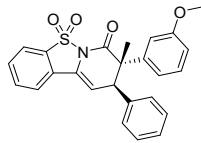

3k

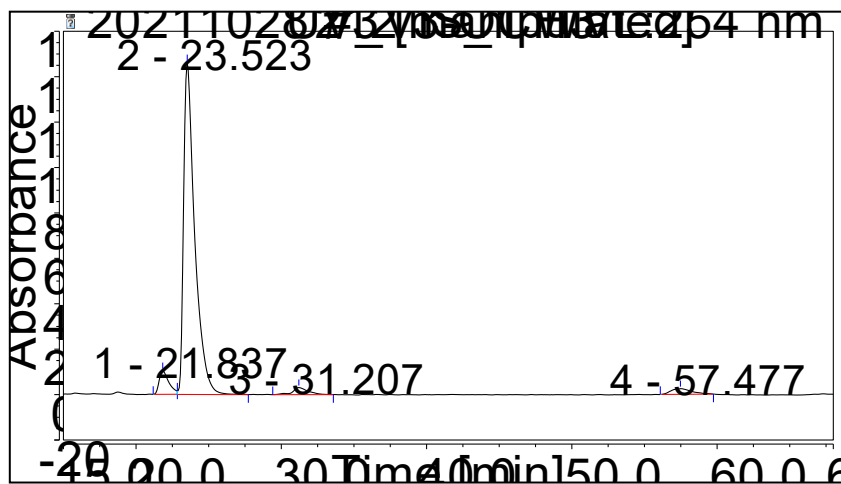

| Integration Results |                       |                 |               |                    |
|---------------------|-----------------------|-----------------|---------------|--------------------|
| Peak Name           | Retention Time<br>min | Area<br>mAU*min | Height<br>mAU | Relative Area<br>% |
| 1                   | 21.837                | 8.036           | 10.398        | 5.51               |
| 2                   | 23.523                | 129.885         | 146.099       | 89.02              |
| 3                   | 31.207                | 3.882           | 3.138         | 2.66               |
| 4                   | 57.477                | 4.096           | 2.500         | 2.81               |

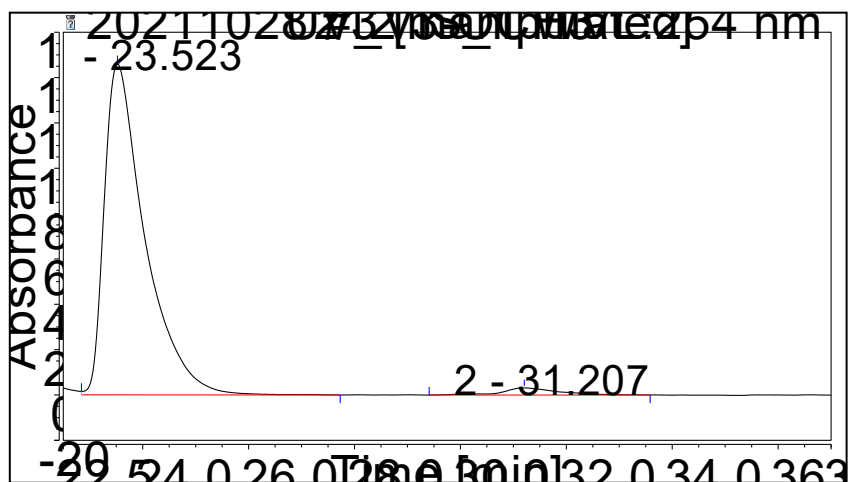

| Integration Results |                       |                 |               |                    |
|---------------------|-----------------------|-----------------|---------------|--------------------|
| Peak Name           | Retention Time<br>min | Area<br>mAU*min | Height<br>mAU | Relative Area<br>% |
| 1                   | 23.523                | 129.885         | 146.099       | 97.10              |
| 2                   | 31.207                | 3.882           | 3.138         | 2.90               |

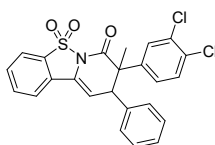

rac 3I

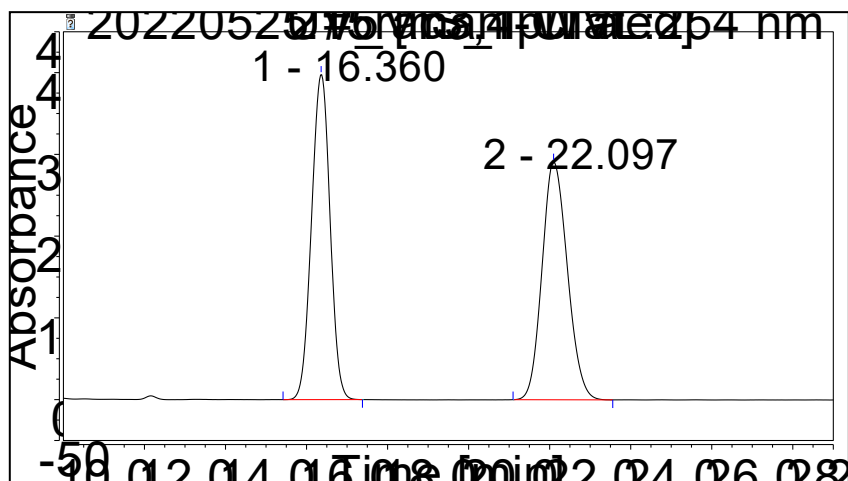

| Integration Results |                       |                 |               |                    |
|---------------------|-----------------------|-----------------|---------------|--------------------|
| Peak Name           | Retention Time<br>min | Area<br>mAU*min | Height<br>mAU | Relative Area<br>% |
| 1                   | 16.360                | 210.361         | 398.104       | 49.95              |
| 2                   | 22.097                | 210.757         | 291.134       | 50.05              |

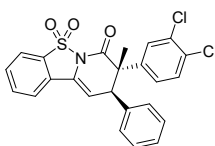

3I

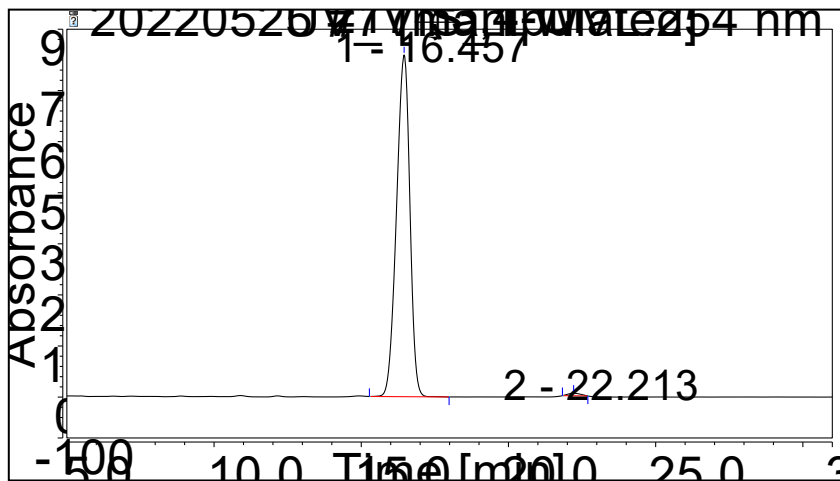

| Integration Results |                       |                 |               |                    |
|---------------------|-----------------------|-----------------|---------------|--------------------|
| Peak Name           | Retention Time<br>min | Area<br>mAU*min | Height<br>mAU | Relative Area<br>% |
| 1                   | 16.457                | 439.805         | 836.251       | 99.29              |
| 2                   | 22.213                | 3.130           | 6.193         | 0.71               |

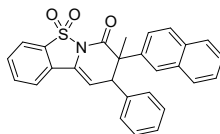

rac 3m

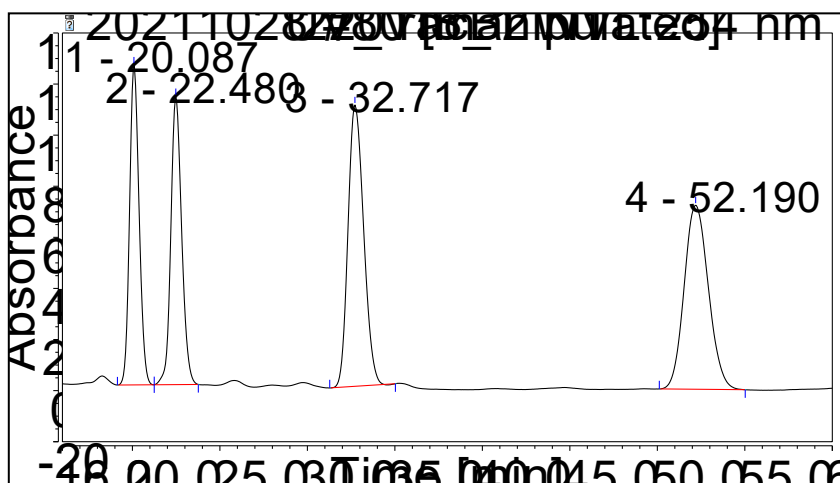

| Integration Results |                       |                 |               |                    |
|---------------------|-----------------------|-----------------|---------------|--------------------|
| Peak Name           | Retention Time<br>min | Area<br>mAU*min | Height<br>mAU | Relative Area<br>% |
| 1                   | 20.087                | 78.899          | 125.200       | 20.28              |
| 2                   | 22.480                | 80.726          | 112.723       | 20.75              |
| 3                   | 32.717                | 113.830         | 110.128       | 29.25              |
| 4                   | 52.190                | 115.640         | 72.063        | 29.72              |

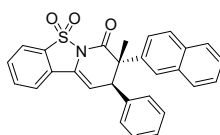

3m

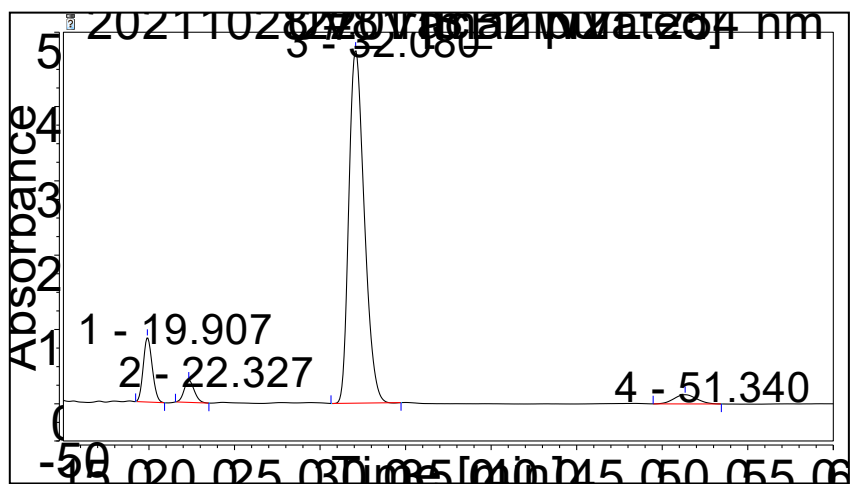

| Integration Results |                       |                 |               |                    |
|---------------------|-----------------------|-----------------|---------------|--------------------|
| Peak Name           | Retention Time<br>min | Area<br>mAU*min | Height<br>mAU | Relative Area<br>% |
| 1                   | 19.907                | 52.833          | 86.882        | 8.98               |
| 2                   | 22.327                | 20.623          | 29.878        | 3.50               |
| 3                   | 32.080                | 495.974         | 474.868       | 84.27              |
| 4                   | 51.340                | 19.124          | 12.398        | 3.25               |

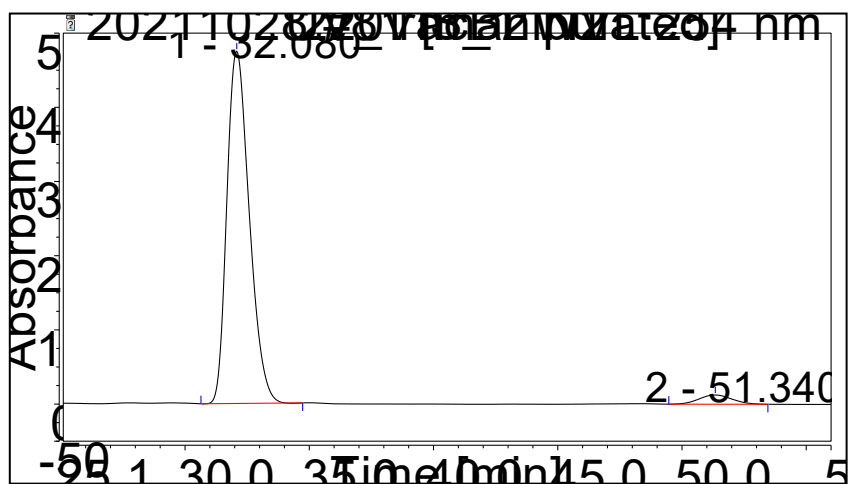

| Integration Results |                       |                 |               |                    |
|---------------------|-----------------------|-----------------|---------------|--------------------|
| Peak Name           | Retention Time<br>min | Area<br>mAU*min | Height<br>mAU | Relative Area<br>% |
| 1                   | 32.080                | 495.974         | 474.868       | 96.29              |
| 2                   | 51.340                | 19.124          | 12.398        | 3.71               |

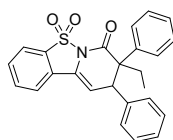

rac 3n



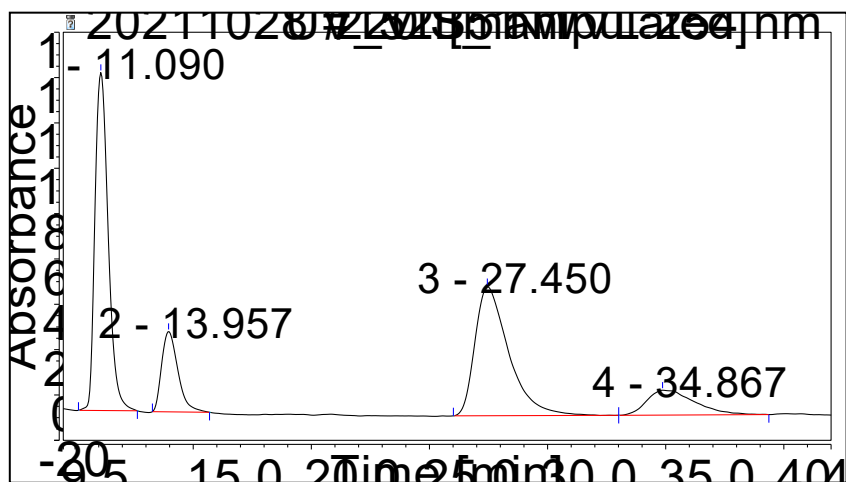

| Integration Results |                       |                 |               |                    |
|---------------------|-----------------------|-----------------|---------------|--------------------|
| Peak Name           | Retention Time<br>min | Area<br>mAU*min | Height<br>mAU | Relative Area<br>% |
| 1                   | 11.090                | 96.942          | 149.113       | 39.56              |
| 2                   | 13.957                | 28.260          | 35.449        | 11.53              |
| 3                   | 27.450                | 94.045          | 56.937        | 38.38              |
| 4                   | 34.867                | 25.793          | 10.976        | 10.53              |

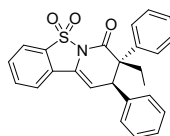

3n

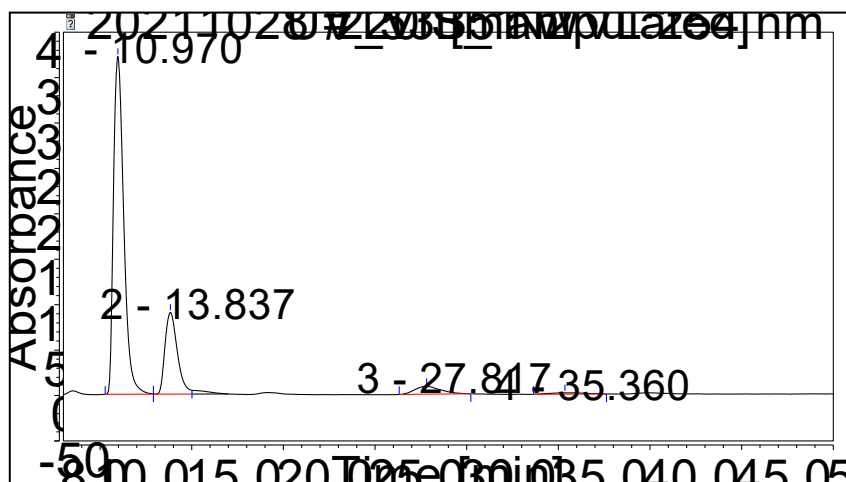

| Integration Results |                       |                 |               |                    |
|---------------------|-----------------------|-----------------|---------------|--------------------|
| Peak Name           | Retention Time<br>min | Area<br>mAU*min | Height<br>mAU | Relative Area<br>% |
| 1                   | 10.970                | 241.014         | 371.889       | 73.44              |
| 2                   | 13.837                | 70.026          | 90.101        | 21.34              |
| 3                   | 27.817                | 13.959          | 8.455         | 4.25               |
| 4                   | 35.360                | 3.172           | 1.438         | 0.97               |

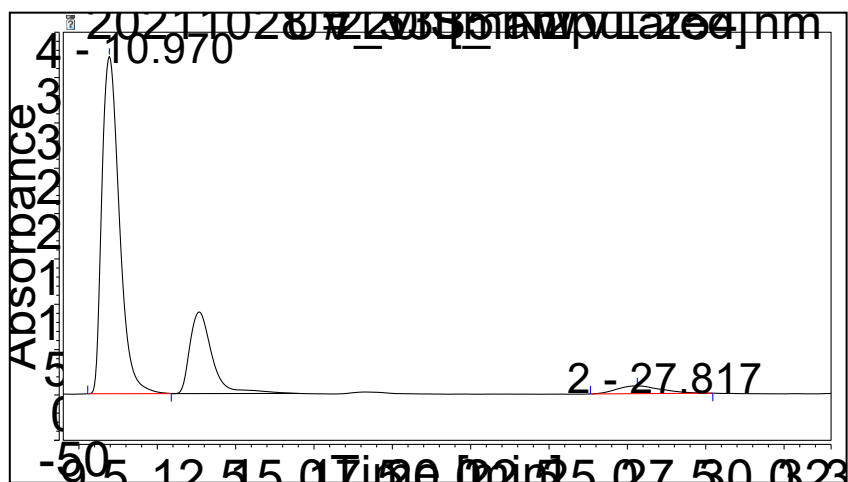

| Peak Name | Retention Time<br>min | Area<br>mAU*min | Height<br>mAU | Relative Area<br>% |
|-----------|-----------------------|-----------------|---------------|--------------------|
| 1         | 10.970                | 241.020         | 371.889       | 94.53              |
| 2         | 27.817                | 13.959          | 8.455         | 5.47               |

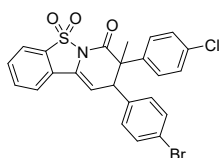

rac 3o

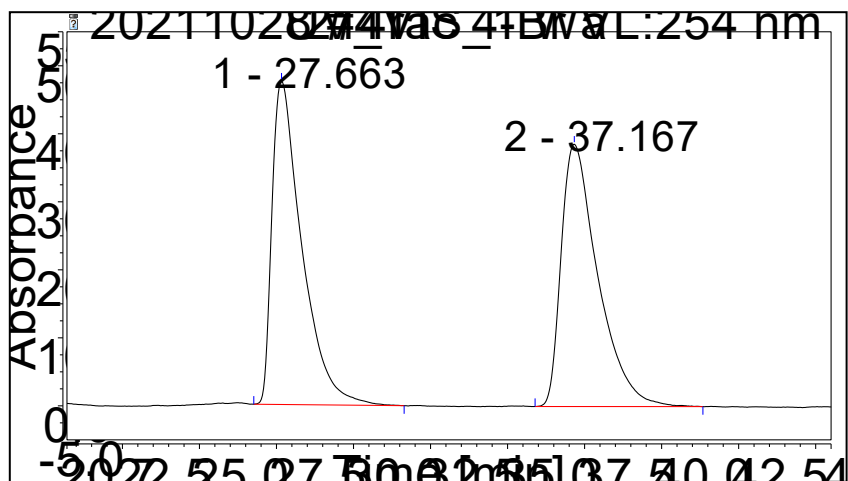

| Peak Name | Retention Time<br>min | Area<br>mAU*min | Height<br>mAU | Relative Area<br>% |
|-----------|-----------------------|-----------------|---------------|--------------------|
| 1         | 27.663                | 53.423          | 47.553        | 50.08              |
| 2         | 37.167                | 53.250          | 38.574        | 49.92              |

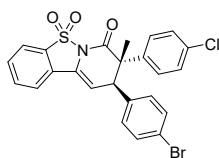

3o

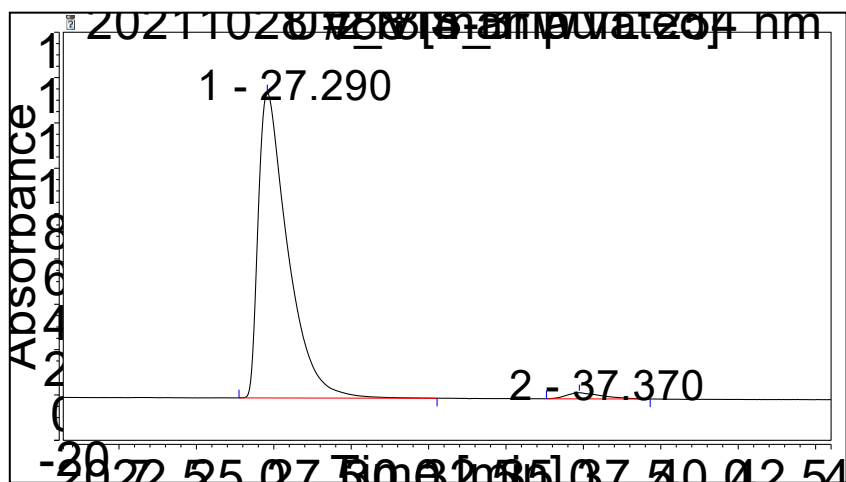

| Integration Results |                       |                 |               |                    |
|---------------------|-----------------------|-----------------|---------------|--------------------|
| Peak Name           | Retention Time<br>min | Area<br>mAU*min | Height<br>mAU | Relative Area<br>% |
| 1                   | 27.290                | 148.615         | 134.614       | 97.66              |
| 2                   | 37.370                | 3.555           | 2.712         | 2.34               |

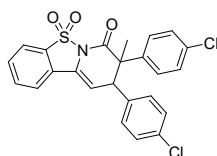

*rac* 3p

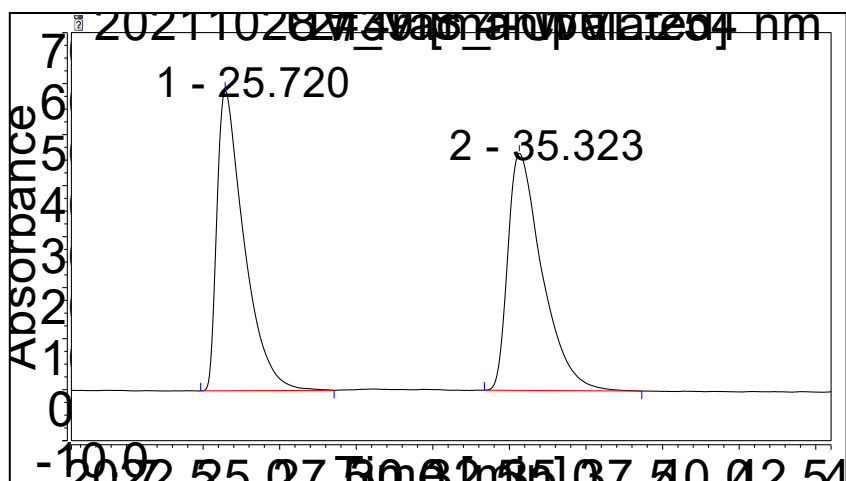

| Integration Results |                       |                 |               |                    |
|---------------------|-----------------------|-----------------|---------------|--------------------|
| Peak Name           | Retention Time<br>min | Area<br>mAU*min | Height<br>mAU | Relative Area<br>% |
| 1                   | 25.720                | 60.538          | 58.889        | 50.13              |
| 2                   | 35.323                | 60.223          | 46.479        | 49.87              |

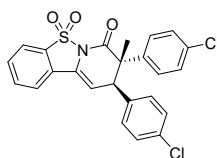

3p

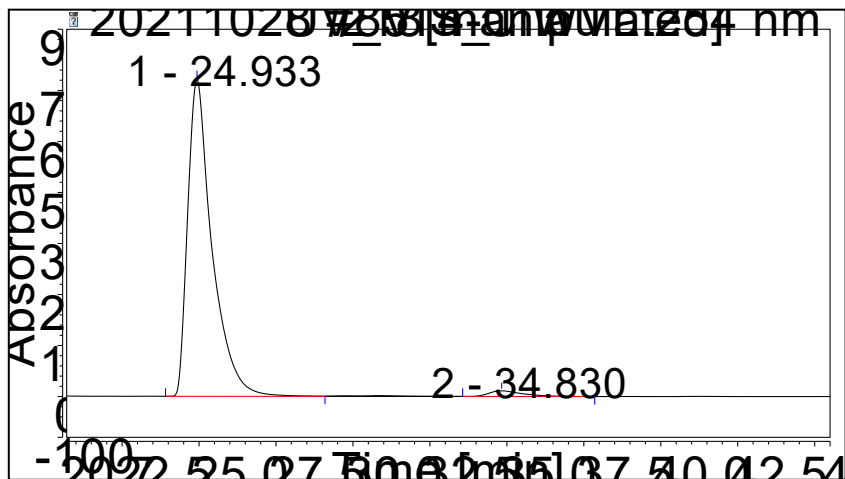

| Integration Results |                       |                 |               |                    |
|---------------------|-----------------------|-----------------|---------------|--------------------|
| Peak Name           | Retention Time<br>min | Area<br>mAU*min | Height<br>mAU | Relative Area<br>% |
| 1                   | 24.933                | 712.110         | 778.337       | 97.59              |
| 2                   | 34.830                | 17.600          | 13.840        | 2.41               |

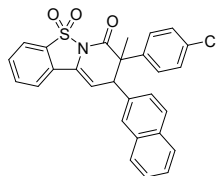

rac 3q

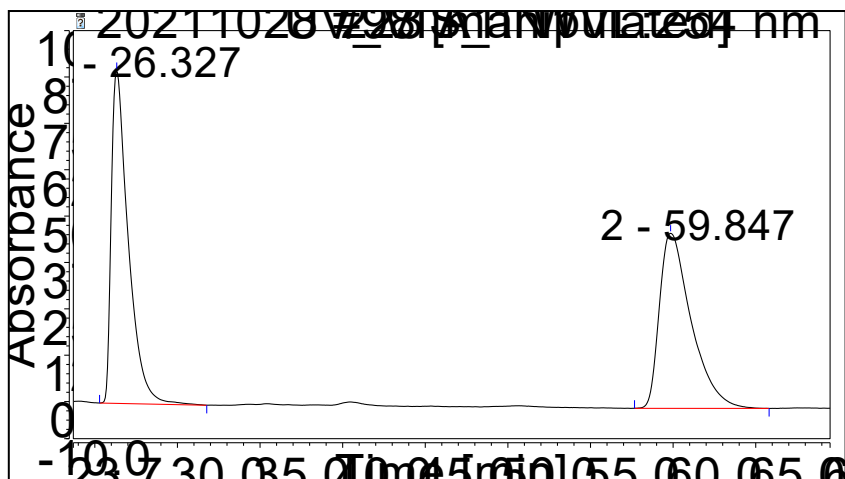

| Integration Results |                       |                 |               |                    |
|---------------------|-----------------------|-----------------|---------------|--------------------|
| Peak Name           | Retention Time<br>min | Area<br>mAU*min | Height<br>mAU | Relative Area<br>% |
| 1                   | 26.327                | 107.166         | 89.708        | 50.53              |
| 2                   | 59.847                | 104.931         | 47.199        | 49.47              |

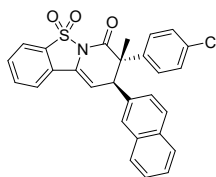

3q
